# Supplementary material for: Non-Covalent Interactions in the Crystal Structures of Perbrominated Sulfonium Derivatives of the closo-Decaborate Anion
Source: MDPI journal article supplement (doi:10.3390/ijms231912022), 2022-10-10
Supplement: s1 [file s1]

# Supplementary information

## Part 1

### Non-covalent Interactions in the Crystal Structures of Perbrominated Sulfonium Derivatives of the *closo*-Decaborate Anion

Aleksei V. Golubev <sup>1,\*</sup>, Alexey S. Kubasov <sup>1,\*</sup>, Alexander Yu. Bykov <sup>1</sup>, Andrey P. Zhdanov <sup>1</sup>, Grigorii A. Buzanov <sup>1</sup>, Alexander A. Korlyukov <sup>2</sup>, Konstantin Yu. Zhizhin <sup>1</sup> and Nikolay T. Kuznetsov <sup>1</sup>

<sup>1</sup> Kurnakov Institute of General and Inorganic Chemistry, Russian Academy of Sciences, 31 Leninsky Prosp., 119071 Moscow, Russia

<sup>2</sup> A.N. Nesmeyanov Institute of Organoelement Compounds, Russian Academy of Sciences, 28 Vavilova Str., 119991 Moscow, Russia

\* Correspondence: golalekseival@mail.ru (A.V.G.); fobosax@mail.ru (A.S.L.)

## Contents

|                                                                                                                                      |    |
|--------------------------------------------------------------------------------------------------------------------------------------|----|
| Additional NMR and IR spectra .....                                                                                                  | 3  |
| X-ray data .....                                                                                                                     | 5  |
| Powder XRD data.....                                                                                                                 | 7  |
| NMR and IR spectra.....                                                                                                              | 10 |
| ( <i>n</i> -Bu <sub>4</sub> N)[B <sub>10</sub> Br <sub>9</sub> S( <i>i</i> -Pr) <sub>2</sub> ] .....                                 | 10 |
| ( <i>n</i> -Bu <sub>4</sub> N)[2-B <sub>10</sub> Br <sub>9</sub> S( <i>n</i> -Pr) <sub>2</sub> ] .....                               | 12 |
| ( <i>n</i> -Bu <sub>4</sub> N)[2-B <sub>10</sub> Br <sub>9</sub> S( <i>n</i> -Bu) <sub>2</sub> ] .....                               | 14 |
| ( <i>n</i> -Bu <sub>4</sub> N)[2-B <sub>10</sub> Br <sub>9</sub> S( <i>n</i> -C <sub>8</sub> H <sub>17</sub> ) <sub>2</sub> ] .....  | 16 |
| ( <i>n</i> -Bu <sub>4</sub> N)[2-B <sub>10</sub> Br <sub>9</sub> S( <i>n</i> -C <sub>12</sub> H <sub>25</sub> ) <sub>2</sub> ] ..... | 18 |
| ( <i>n</i> -Bu <sub>4</sub> N)[2-B <sub>10</sub> Br <sub>9</sub> S( <i>n</i> -C <sub>18</sub> H <sub>37</sub> ) <sub>2</sub> ] ..... | 20 |

## Additional NMR and IR spectra

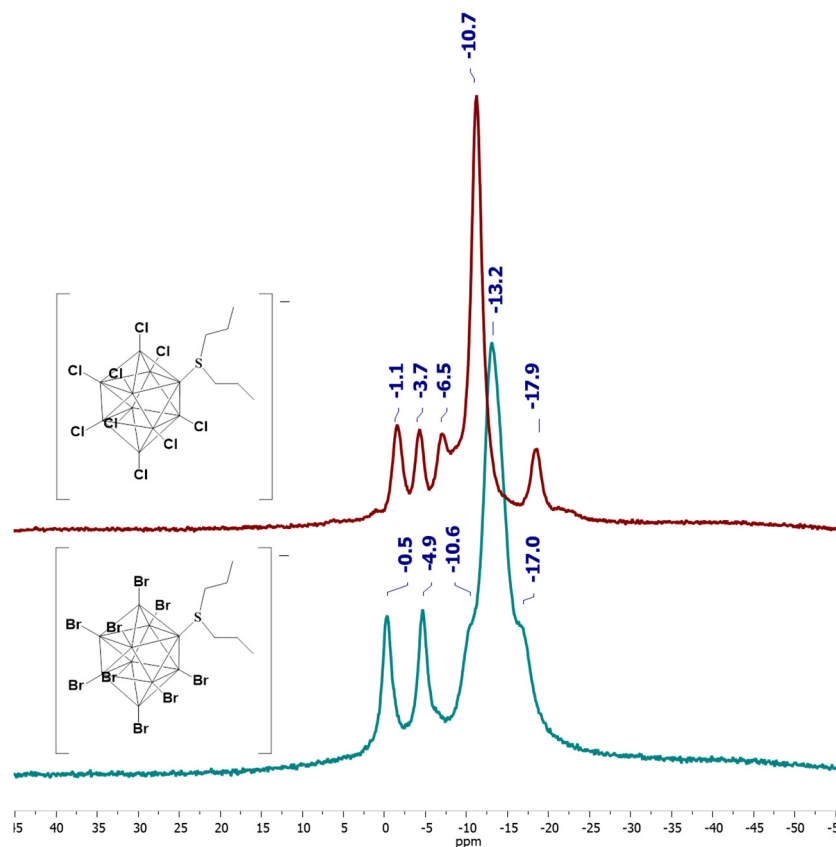

**Figure S1.**  $^{11}\text{B}$  NMR spectra of perchlorinated sulfonium derivatives of the *closo*-decaborate anion

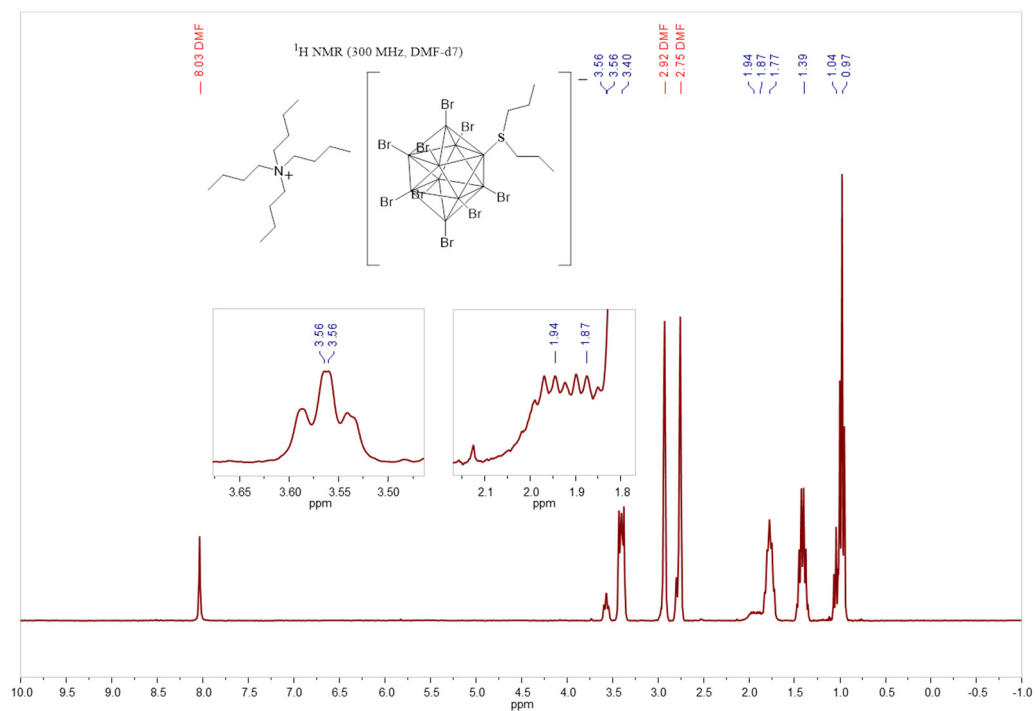

**Figure S2.**  $^1\text{H}$  NMR spectrum of the compound **1** in  $\text{DMF-d}_7$

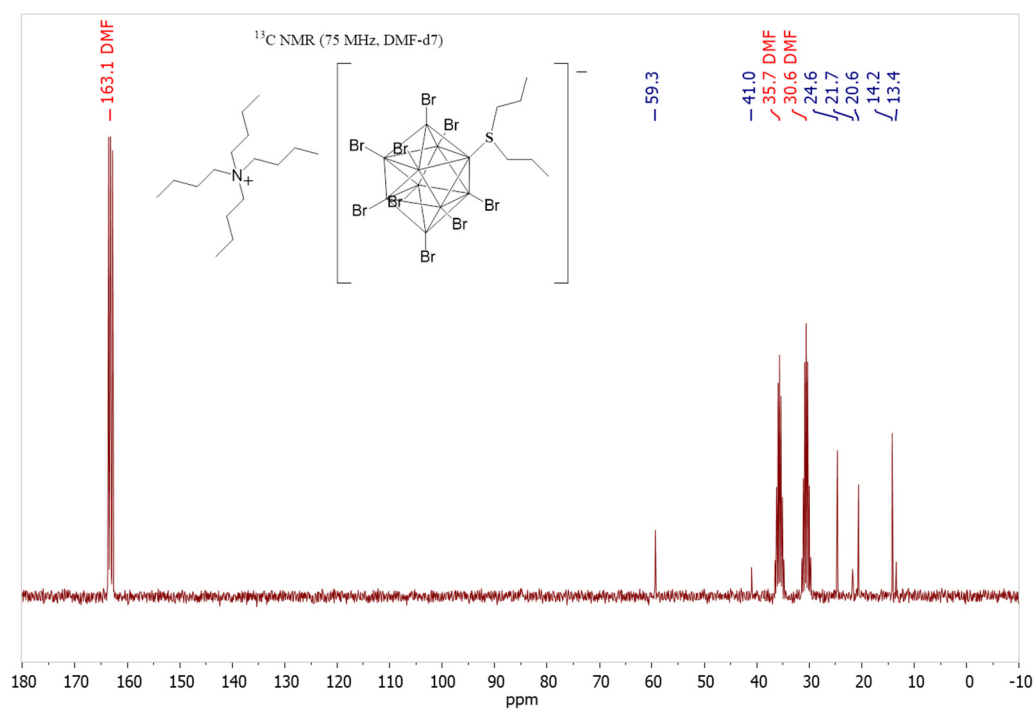

**Figure S3.**  $^{13}\text{C}$  NMR spectrum of compound 1 in DMF- $d_7$

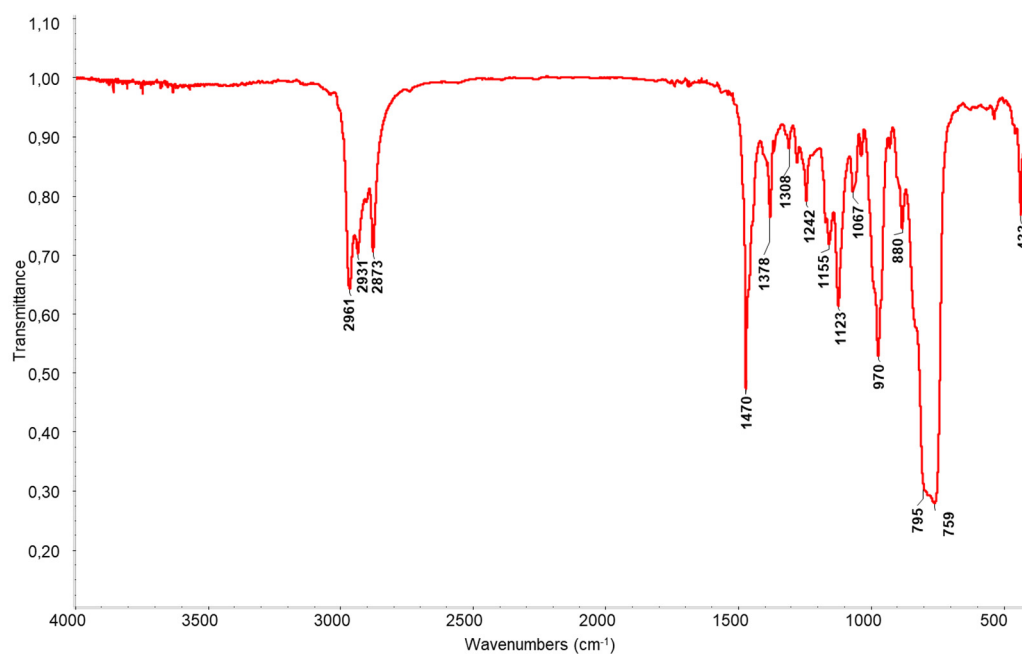

**Figure S4.** IR spectrum of the compound 1 in  $\text{CCl}_4$

## X-ray data

**Table S1.** Crystal data and structure refinement for compound **1**, **2**, **3**

| Compound                                    | ( <i>n</i> -Bu <sub>4</sub> N)[2-B <sub>10</sub> Br <sub>9</sub> S]( <i>n</i> -Pr) <sub>2</sub> ] ( <b>1</b> ) | ( <i>n</i> -Bu <sub>4</sub> N)[2-B <sub>10</sub> Br <sub>9</sub> S( <i>i</i> -Pr) <sub>2</sub> ] ( <b>2</b> ) | ( <i>n</i> -Bu <sub>4</sub> N)[2-B <sub>10</sub> Br <sub>9</sub> S( <i>n</i> -Bu) <sub>2</sub> ] ( <b>3</b> ) |
|---------------------------------------------|----------------------------------------------------------------------------------------------------------------|---------------------------------------------------------------------------------------------------------------|---------------------------------------------------------------------------------------------------------------|
| Empirical formula                           | C <sub>22</sub> H <sub>50</sub> B <sub>10</sub> Br <sub>9</sub> NS                                             | C <sub>22</sub> H <sub>47</sub> B <sub>10</sub> Br <sub>9</sub> NS                                            | C <sub>24</sub> H <sub>50</sub> B <sub>10</sub> Br <sub>9</sub> SN <sub>0.5</sub>                             |
| Formula weight                              | 1187.98                                                                                                        | 1184.95                                                                                                       | 1204.99                                                                                                       |
| Temperature/K                               | 296                                                                                                            | 296                                                                                                           | 100                                                                                                           |
| Crystal system                              | triclinic                                                                                                      | triclinic                                                                                                     | triclinic                                                                                                     |
| Space group                                 | P-1                                                                                                            | P-1                                                                                                           | P-1                                                                                                           |
| a/Å                                         | 12.6658(3)                                                                                                     | 12.3314(8)                                                                                                    | 12.6289(8)                                                                                                    |
| b/Å                                         | 12.8233(4)                                                                                                     | 12.8511(8)                                                                                                    | 12.7015(7)                                                                                                    |
| c/Å                                         | 14.4929(4)                                                                                                     | 16.1993(10)                                                                                                   | 15.0571(9)                                                                                                    |
| α/°                                         | 91.3600(10)                                                                                                    | 70.880(2)                                                                                                     | 90.755(2)                                                                                                     |
| β/°                                         | 109.3590(10)                                                                                                   | 73.950(2)                                                                                                     | 111.322(2)                                                                                                    |
| γ/°                                         | 107.6790(10)                                                                                                   | 62.054(2)                                                                                                     | 106.796(2)                                                                                                    |
| Volume/Å <sup>3</sup>                       | 2095.57(10)                                                                                                    | 2119.3(2)                                                                                                     | 2134.9(2)                                                                                                     |
| Z                                           | 2                                                                                                              | 2                                                                                                             | 2                                                                                                             |
| ρ <sub>calc</sub> /cm <sup>3</sup>          | 1.883                                                                                                          | 1.857                                                                                                         | 1.874                                                                                                         |
| μ/mm <sup>-1</sup>                          | 8.676                                                                                                          | 8.578                                                                                                         | 8.517                                                                                                         |
| F(000)                                      | 1140.0                                                                                                         | 1134.0                                                                                                        | 1157.0                                                                                                        |
| Radiation                                   | MoKα (λ = 0.71073)                                                                                             | MoKα (λ = 0.71073)                                                                                            | MoKα (λ = 0.71073)                                                                                            |
| 2θ range for data collection/°              | 4.82 to 55.64                                                                                                  | 3.69 to 50.63                                                                                                 | 4.468 to 55.992                                                                                               |
| Reflections collected                       | 18556                                                                                                          | 15020                                                                                                         | 24397                                                                                                         |
| Independent reflections                     | 9649 [R <sub>int</sub> = 0.0364, R <sub>sigma</sub> = 0.0705]                                                  | 7668 [R <sub>int</sub> = 0.0366, R <sub>sigma</sub> = 0.0714]                                                 | 10176 [R <sub>int</sub> = 0.0573, R <sub>sigma</sub> = 0.0991]                                                |
| Data/restraints/parameters                  | 9649/0/394                                                                                                     | 7668/8/424                                                                                                    | 10176/0/412                                                                                                   |
| Goodness-of-fit on F <sup>2</sup>           | 0.964                                                                                                          | 1.037                                                                                                         | 0.954                                                                                                         |
| Final R indexes [I>=2σ (I)]                 | R <sub>1</sub> = 0.0408, wR <sub>2</sub> = 0.0688                                                              | R <sub>1</sub> = 0.0509, wR <sub>2</sub> = 0.1158                                                             | R <sub>1</sub> = 0.0485, wR <sub>2</sub> = 0.0859                                                             |
| Final R indexes [all data]                  | R <sub>1</sub> = 0.0879, wR <sub>2</sub> = 0.0804                                                              | R <sub>1</sub> = 0.1020, wR <sub>2</sub> = 0.1331                                                             | R <sub>1</sub> = 0.0937, wR <sub>2</sub> = 0.0979                                                             |
| Largest diff. peak/hole / e Å <sup>-3</sup> | 0.61/-0.56                                                                                                     | 1.73/-1.44                                                                                                    | 1.15/-0.93                                                                                                    |

**Table S1.** Crystal data and structure refinement for compound **5**, **6**

| Compound                                          | ( <i>n</i> -Bu <sub>4</sub> N)[2-B <sub>10</sub> Br <sub>9</sub> S( <i>n</i> -C <sub>12</sub> H <sub>25</sub> ) <sub>2</sub> ] ( <b>5</b> ) | ( <i>n</i> -Bu <sub>4</sub> N)[2-B <sub>10</sub> Br <sub>9</sub> S( <i>n</i> -C <sub>18</sub> H <sub>37</sub> ) <sub>2</sub> ] ( <b>6</b> ) |
|---------------------------------------------------|---------------------------------------------------------------------------------------------------------------------------------------------|---------------------------------------------------------------------------------------------------------------------------------------------|
| <b>Empirical formula</b>                          | C <sub>40</sub> H <sub>86</sub> B <sub>10</sub> Br <sub>9</sub> NS                                                                          | C <sub>52</sub> H <sub>110</sub> B <sub>10</sub> Br <sub>9</sub> NSO <sub>0.5</sub>                                                         |
| <b>Formula weight</b>                             | 1442.46                                                                                                                                     | 1616.75                                                                                                                                     |
| <b>Temperature/K</b>                              | 100                                                                                                                                         | 100                                                                                                                                         |
| <b>Crystal system</b>                             | monoclinic                                                                                                                                  | triclinic                                                                                                                                   |
| <b>Space group</b>                                | P2 <sub>1</sub> /c                                                                                                                          | P-1                                                                                                                                         |
| <b>a/Å</b>                                        | 18.1779(6)                                                                                                                                  | 12.1587(3)                                                                                                                                  |
| <b>b/Å</b>                                        | 12.7161(4)                                                                                                                                  | 12.3026(3)                                                                                                                                  |
| <b>c/Å</b>                                        | 26.3463(10)                                                                                                                                 | 28.3917(7)                                                                                                                                  |
| <b>α/°</b>                                        | 90.00                                                                                                                                       | 80.7610(10)                                                                                                                                 |
| <b>β/°</b>                                        | 101.5690(10)                                                                                                                                | 80.1370(10)                                                                                                                                 |
| <b>γ/°</b>                                        | 90.00                                                                                                                                       | 62.6950(10)                                                                                                                                 |
| <b>Volume/Å<sup>3</sup></b>                       | 5966.3(4)                                                                                                                                   | 3701.62(16)                                                                                                                                 |
| <b>Z</b>                                          | 4                                                                                                                                           | 2                                                                                                                                           |
| <b>ρ<sub>calc</sub>/cm<sup>3</sup></b>            | 1.606                                                                                                                                       | 1.451                                                                                                                                       |
| <b>μ/mm<sup>-1</sup></b>                          | 6.110                                                                                                                                       | 4.933                                                                                                                                       |
| <b>F(000)</b>                                     | 2864.0                                                                                                                                      | 1628.0                                                                                                                                      |
| <b>Radiation</b>                                  | MoKα (λ = 0.71073)                                                                                                                          | MoKα (λ = 0.71073)                                                                                                                          |
| <b>2θ range for data collection/°</b>             | 3.58 to 52                                                                                                                                  | 3.742 to 52                                                                                                                                 |
| <b>Reflections collected</b>                      | 54265                                                                                                                                       | 31742                                                                                                                                       |
| <b>Independent reflections</b>                    | 11717 [R <sub>int</sub> = 0.0649, R <sub>sigma</sub> = 0.0665]                                                                              | 14366 [R <sub>int</sub> = 0.0446, R <sub>sigma</sub> = 0.0726]                                                                              |
| <b>Data/restraints/parameters</b>                 | 11717/0/556                                                                                                                                 | 14366/0/668                                                                                                                                 |
| <b>Goodness-of-fit on F<sup>2</sup></b>           | 1.014                                                                                                                                       | 1.030                                                                                                                                       |
| <b>Final R indexes [I&gt;=2σ (I)]</b>             | R <sub>1</sub> = 0.0447, wR <sub>2</sub> = 0.0980                                                                                           | R <sub>1</sub> = 0.0439, wR <sub>2</sub> = 0.1099                                                                                           |
| <b>Final R indexes [all data]</b>                 | R <sub>1</sub> = 0.0771, wR <sub>2</sub> = 0.1108                                                                                           | R <sub>1</sub> = 0.0688, wR <sub>2</sub> = 0.1195                                                                                           |
| <b>Largest diff. peak/hole / e Å<sup>-3</sup></b> | 1.13/-0.84                                                                                                                                  | 1.13/-0.78                                                                                                                                  |

### Powder XRD data

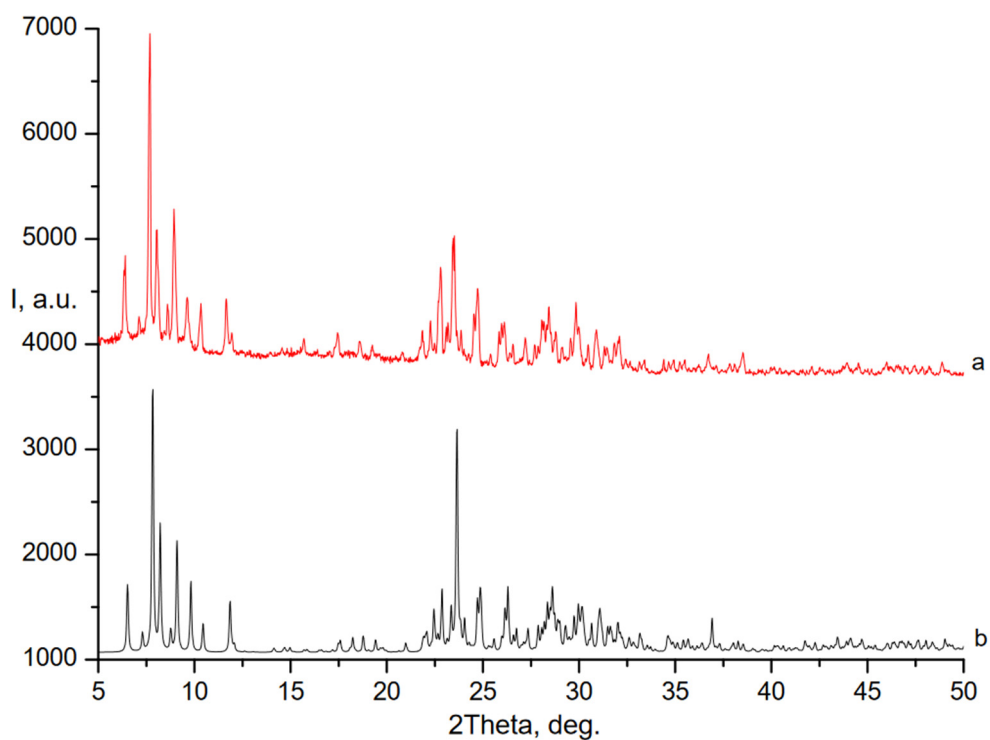

**Figure S5.** powder XRD data of the compound  $(n\text{-Bu}_4\text{N})[2\text{-B}_{10}\text{Br}_9\text{S}(n\text{-Pr})_2]$ .  
a - experimental, b – theoretical

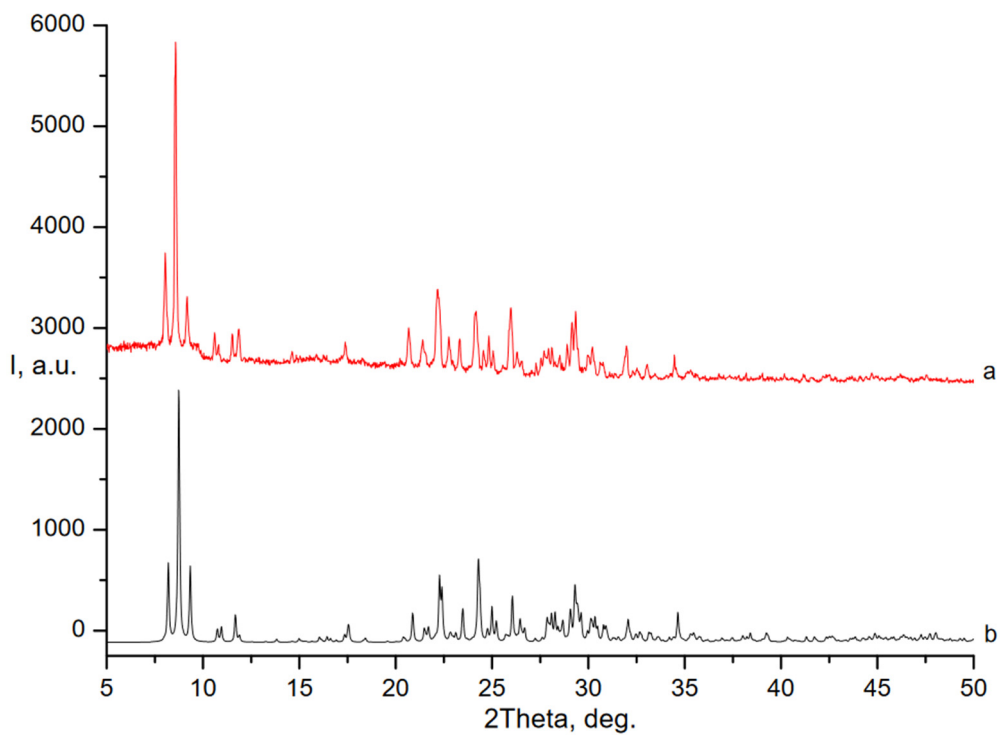

**Figure S6.** powder XRD data of the compound  $(n\text{-Bu}_4\text{N})[2\text{-B}_{10}\text{Br}_9\text{S}(i\text{-Pr})_2]$ .  
a - experimental, b – theoretical

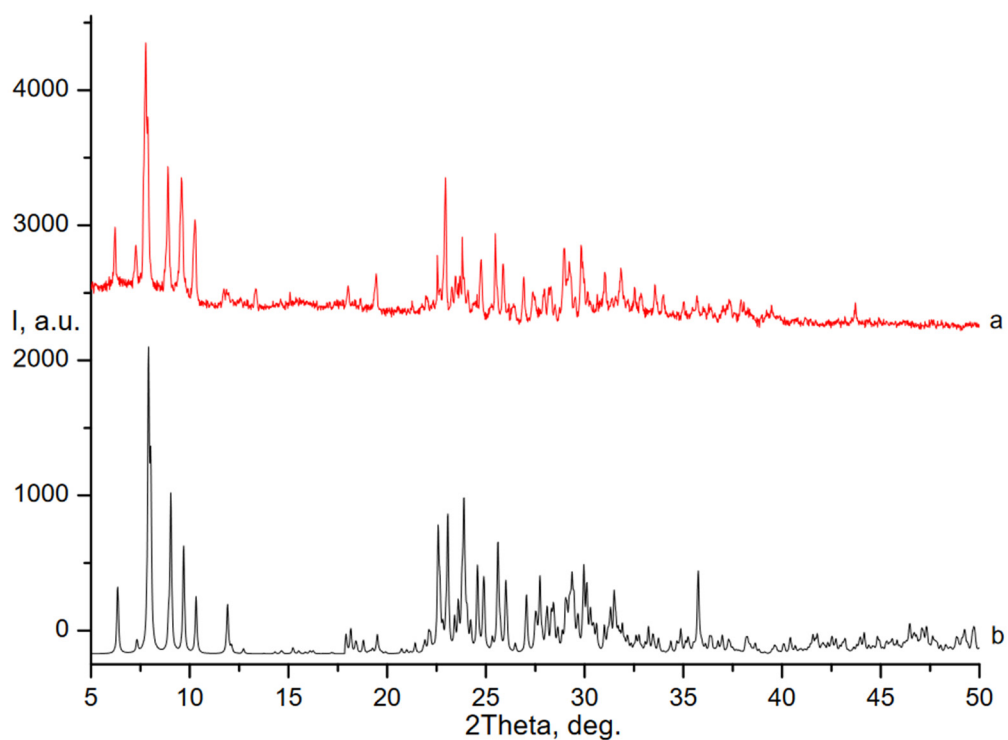

**Figure S7.** powder XRD data of the compound  $(n\text{-Bu}_4\text{N})[2\text{-B}_{10}\text{Br}_9\text{S}(n\text{-Bu})_2]$ .  
a - experimental, b – theoretical

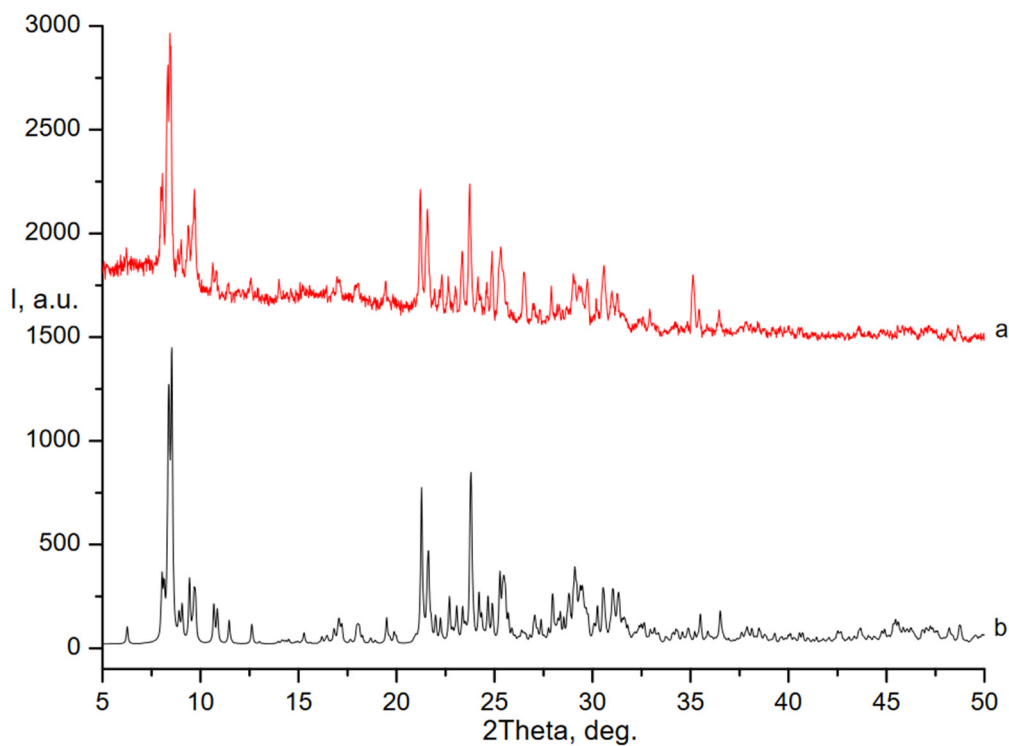

**Figure S8.** powder XRD data of the compound  $(n\text{-Bu}_4\text{N})[2\text{-B}_{10}\text{Br}_9\text{S}(n\text{-C}_8\text{H}_{17})_2]$ .  
a - experimental, b – theoretical



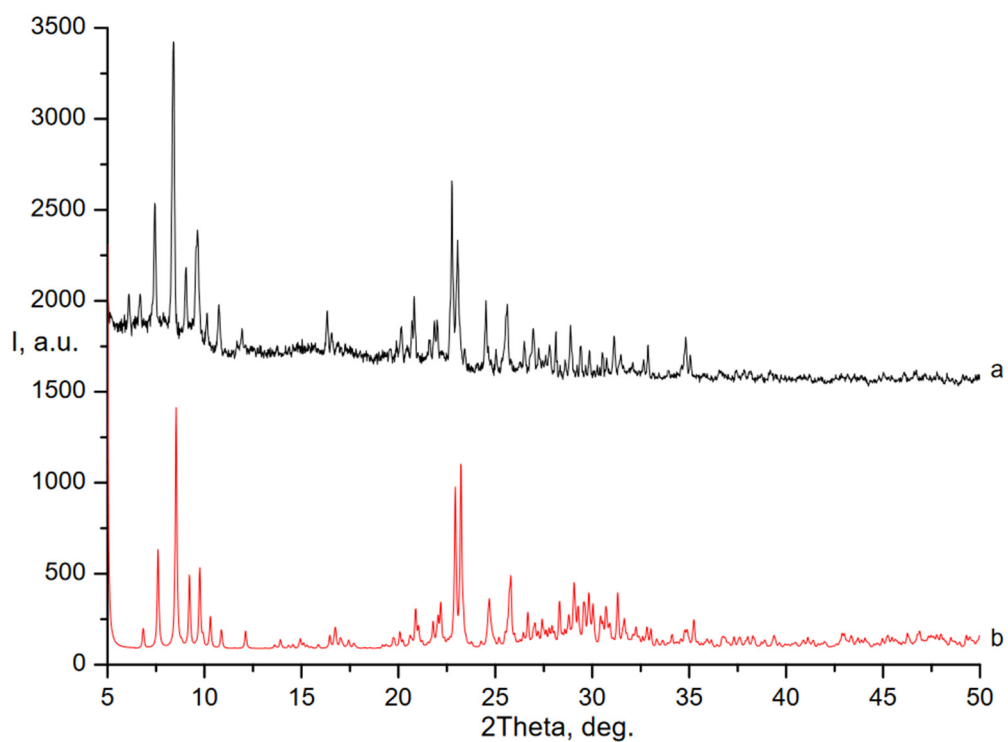

**Figure S9.** powder XRD data of the compound  $(n\text{-Bu}_4\text{N})[2\text{-B}_{10}\text{Br}_9\text{S}(n\text{-C}_{12}\text{H}_{25})_2]$ .  
a - experimental, b – theoretical

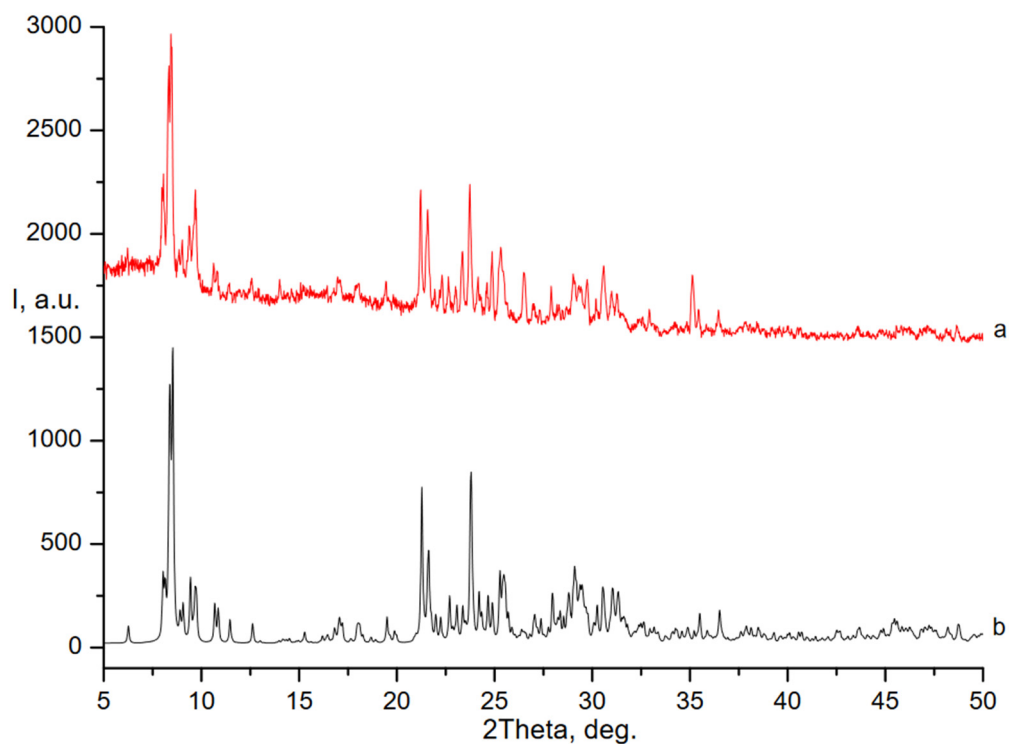

**Figure S10.** powder XRD data of the compound  $(n\text{-Bu}_4\text{N})[2\text{-B}_{10}\text{Br}_9\text{S}(n\text{-C}_{18}\text{H}_{37})_2]$ .  
a - experimental, b – theoretical

## NMR and IR spectra

### $(n\text{-Bu}_4\text{N})[\text{B}_{10}\text{Br}_9\text{S}(i\text{-Pr})_2]$

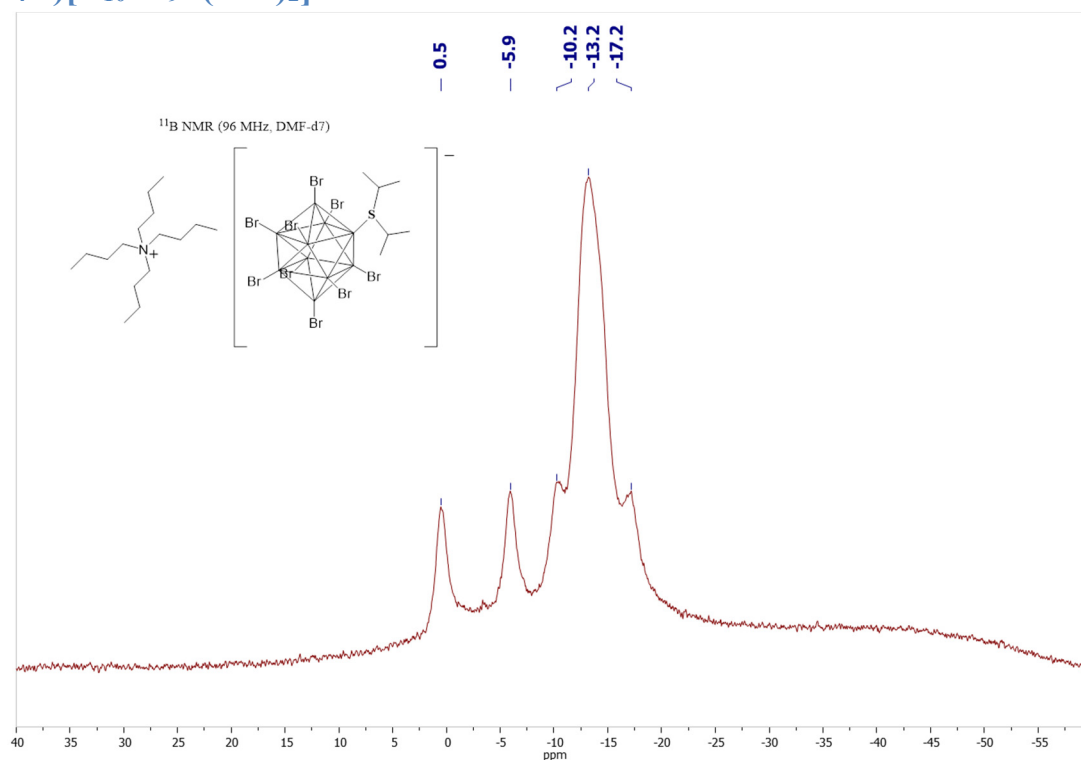

**Figure S11.**  $^{11}\text{B}$  NMR spectrum (DMF- $d_7$ , 96.32 MHz) of  $(\text{Bu}_4\text{N})[2\text{-B}_{10}\text{Br}_9\text{S}(i\text{-Pr})_2]$

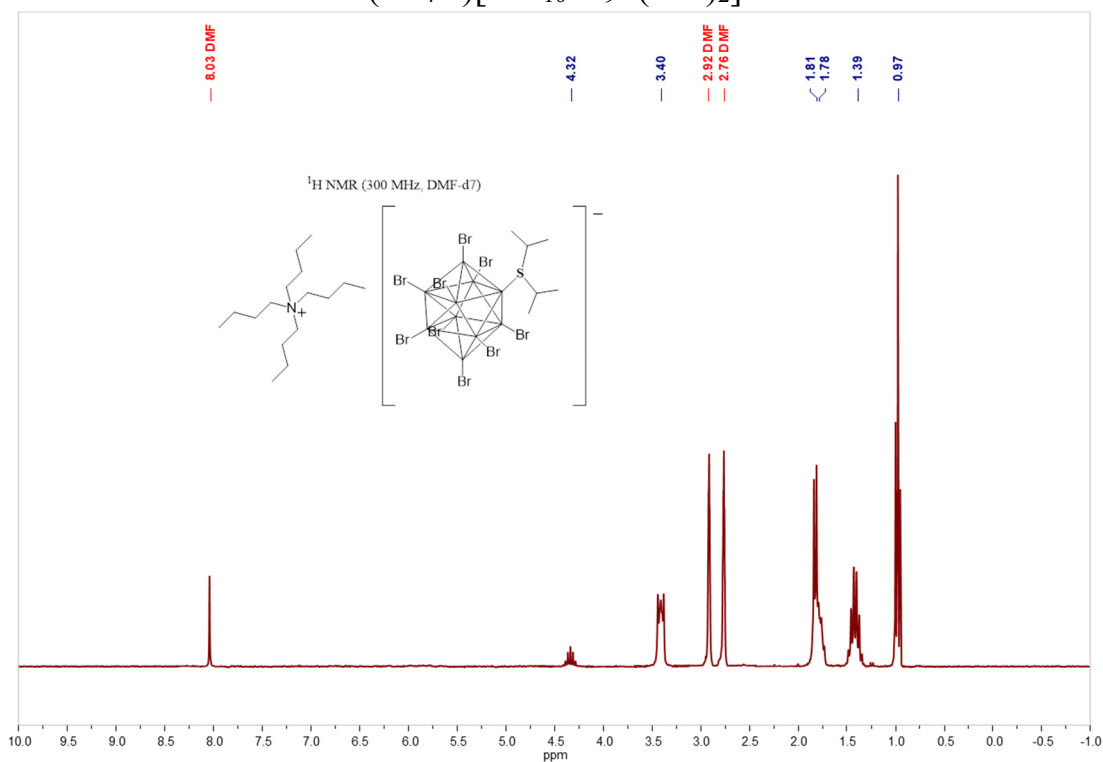

**Figure S12.**  $^1\text{H}$  NMR spectrum (DMF- $d_7$ , 300.3 MHz) of  $(n\text{-Bu}_4\text{N})[2\text{-B}_{10}\text{Br}_9\text{S}(i\text{-Pr})_2]$

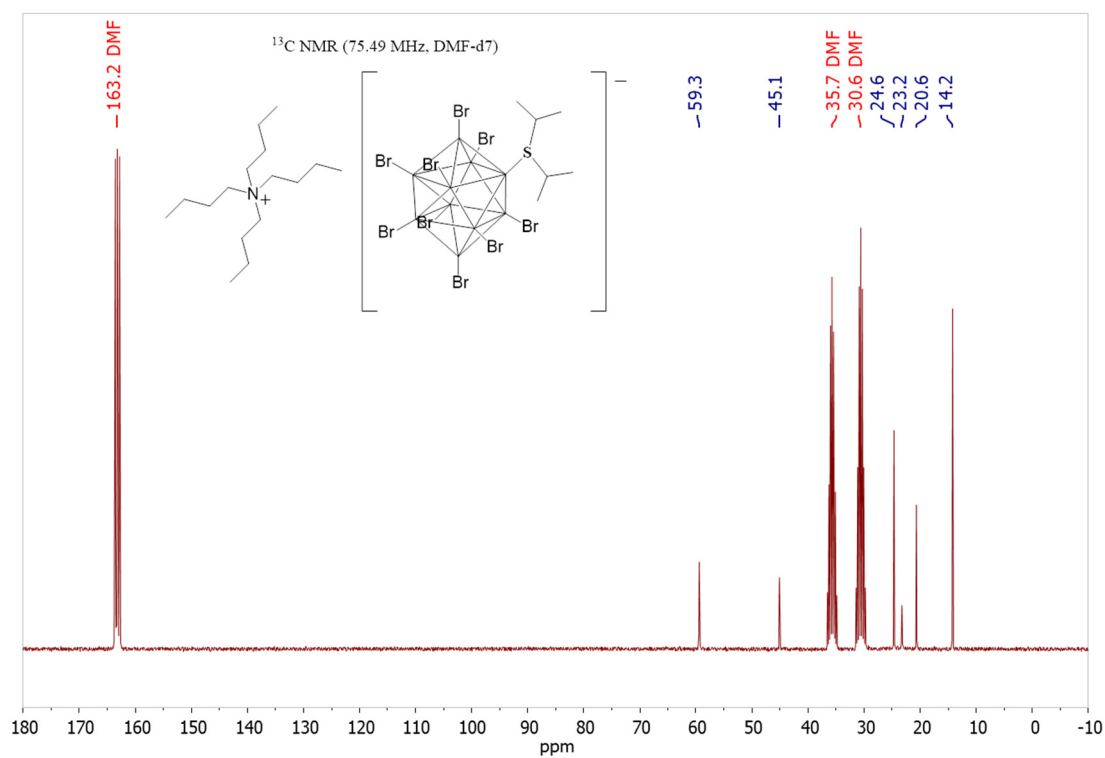

**Figure S13.** <sup>13</sup>C NMR spectrum (DMF-d<sub>7</sub>, 75.49 MHz) of  $(n\text{-Bu}_4\text{N})[2\text{-B}_{10}\text{Br}_9\text{S}(i\text{-Pr})_2]$

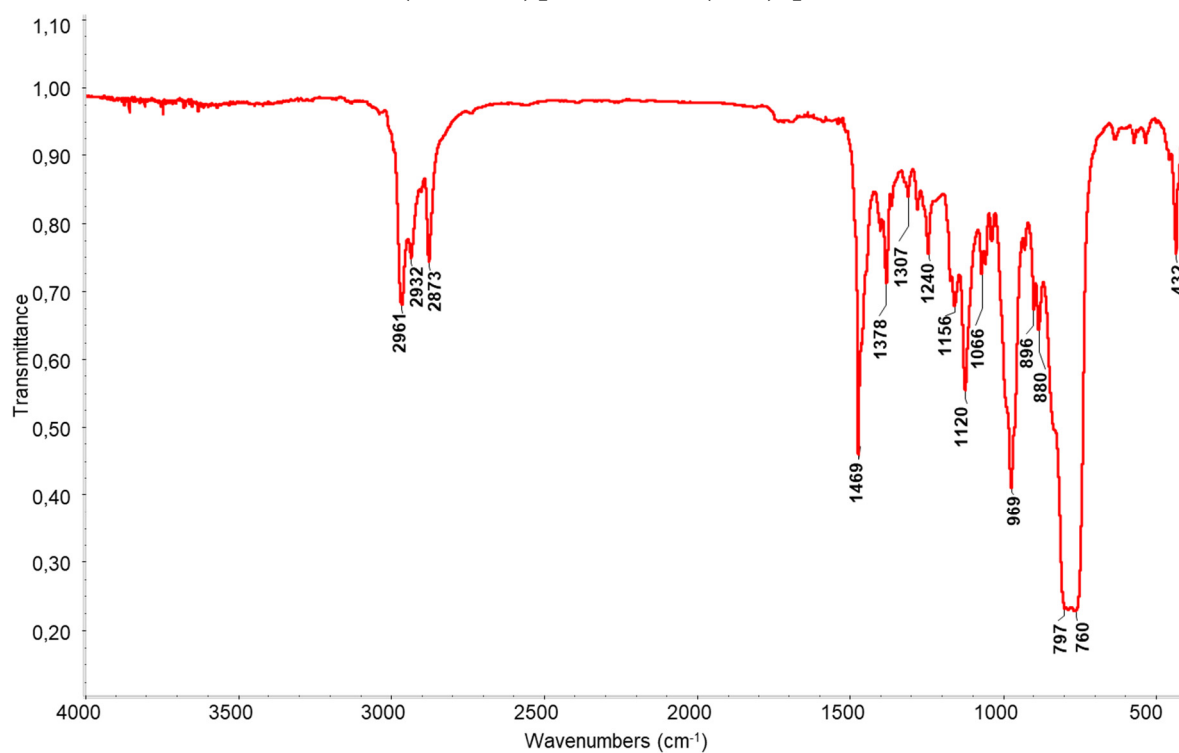

**Figure S14.** IR spectra (in CCl<sub>4</sub>) of  $(n\text{-Bu}_4\text{N})[2\text{-B}_{10}\text{Br}_9\text{S}(i\text{-Pr})_2]$

**(*n*-Bu<sub>4</sub>N)[2-B<sub>10</sub>Br<sub>9</sub>S(*n*-Pr)<sub>2</sub>]**

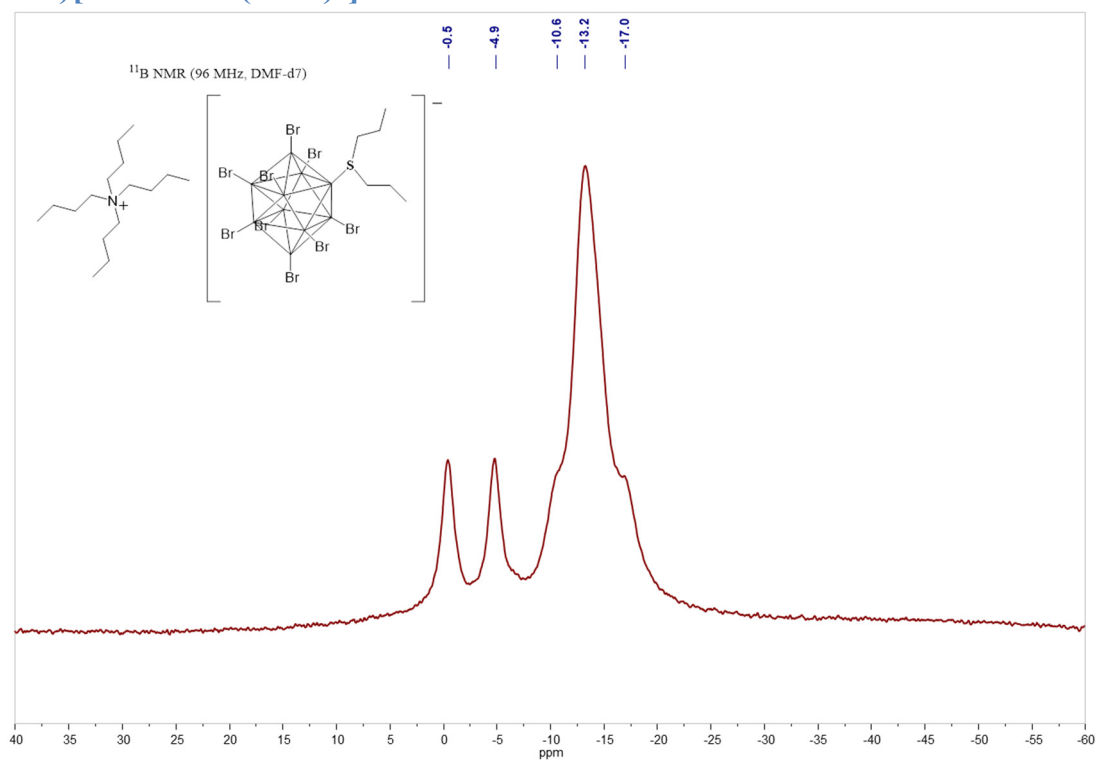

**Figure S15.**  $^{11}\text{B}$  NMR spectrum (DMF- $\text{d}_7$ , 96.32 MHz) of  $(n\text{-Bu}_4\text{N})[2\text{-B}_{10}\text{Br}_9\text{S}(n\text{-Pr})_2]$

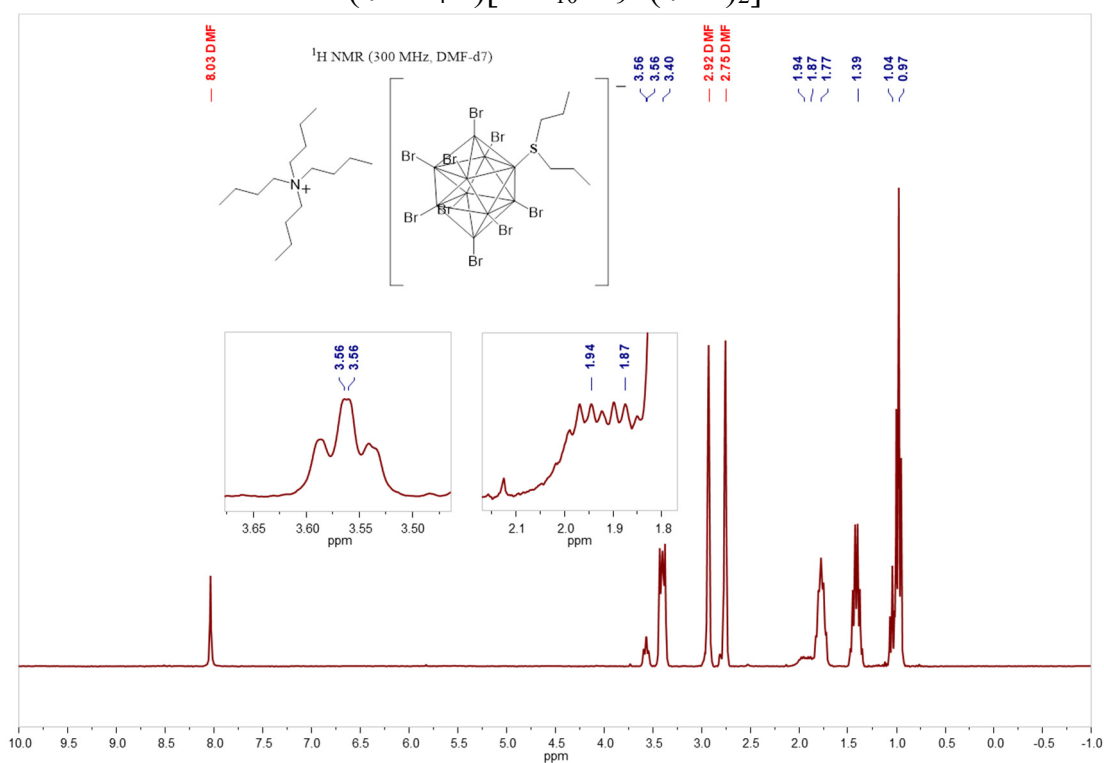

**Figure S16.**  $^1\text{H}$  NMR spectrum (DMF- $d_7$ , 300.3 MHz) of  $(n\text{-Bu}_4\text{N})[2\text{-B}_{10}\text{Br}_9\text{S}(n\text{-Pr})_2]$

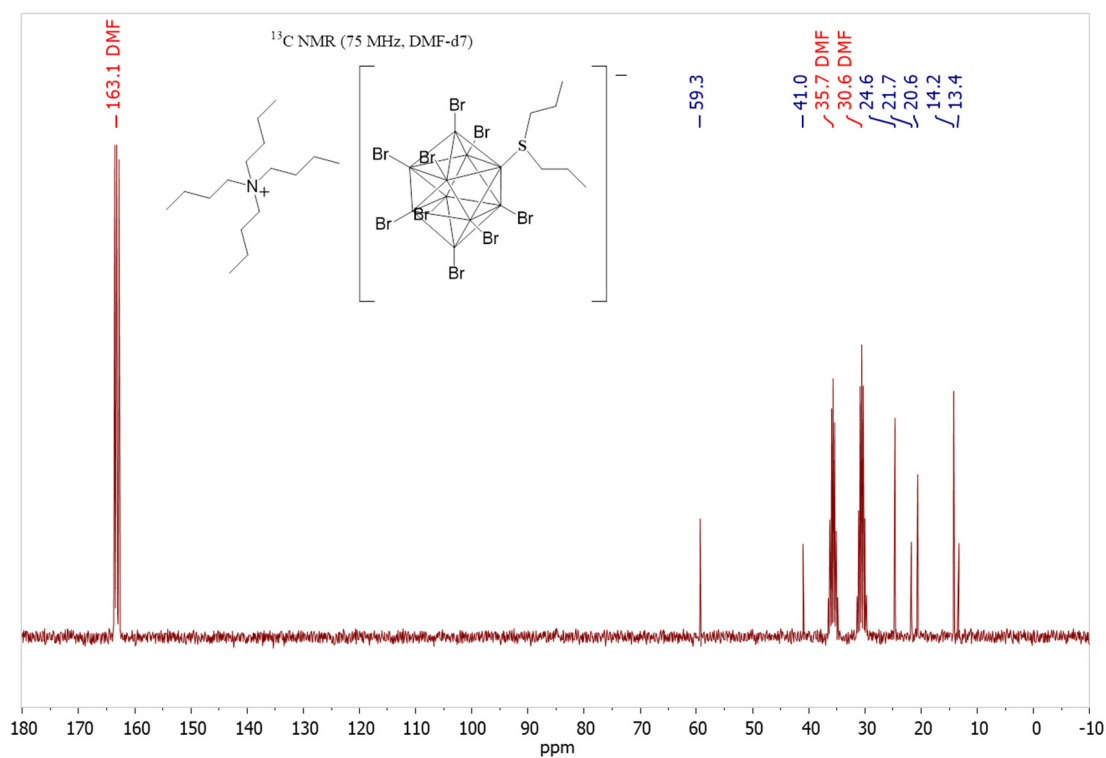

**Figure S17.** <sup>13</sup>C NMR spectrum (DMF-d<sub>7</sub>, 75.49 MHz) of  $(n\text{-Bu}_4\text{N})[2\text{-B}_{10}\text{Br}_9\text{S}(n\text{-Pr})_2]$

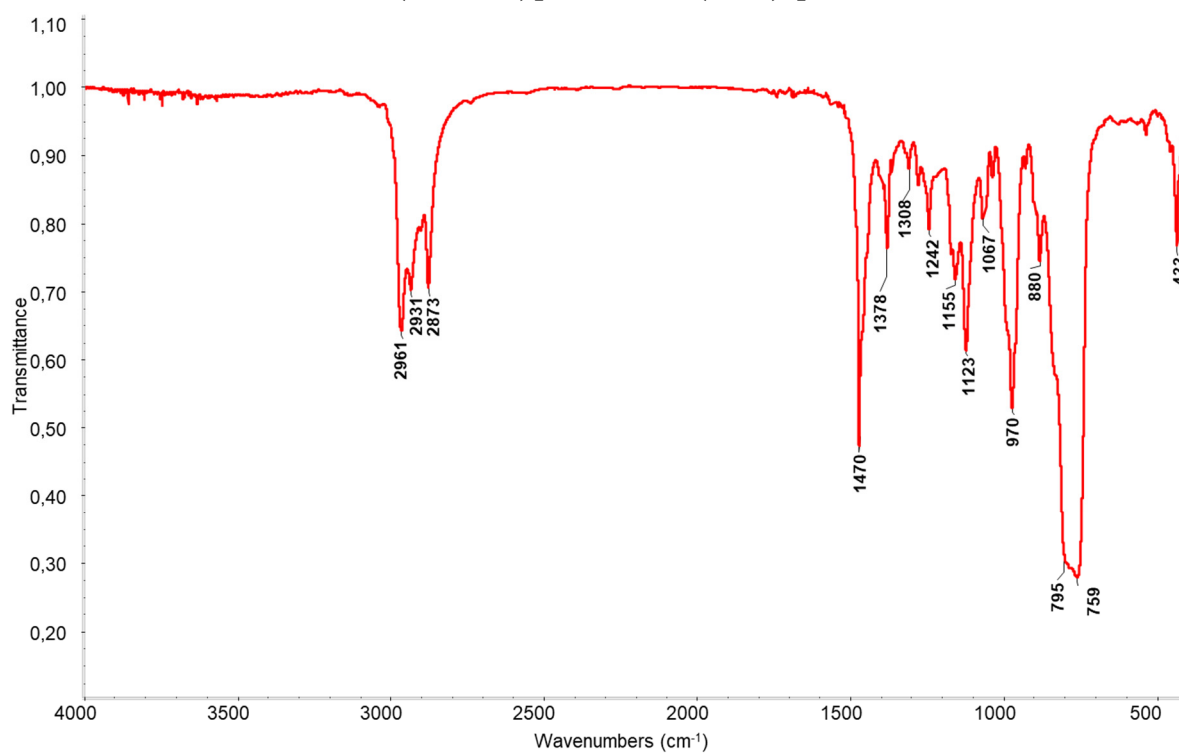

**Figure S18.** IR spectra (in CCl<sub>4</sub>) of  $(n\text{-Bu}_4\text{N})[2\text{-B}_{10}\text{Br}_9\text{S}(n\text{-Pr})_2]$

**$(n\text{-Bu}_4\text{N})[2\text{-B}_{10}\text{Br}_9\text{S}(n\text{-Bu})_2]$**

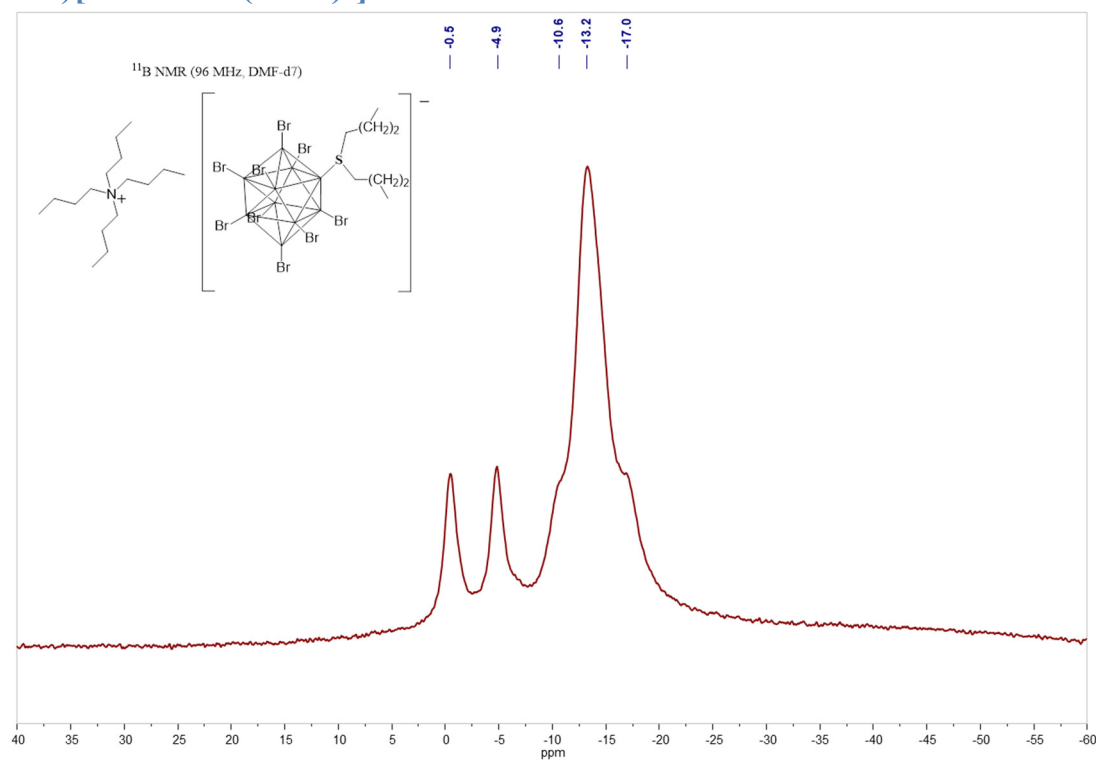

**Figure S19.**  $^{11}\text{B}$  NMR spectrum (DMF- $d_7$ , 96.32 MHz) of  $(n\text{-Bu}_4\text{N})[2\text{-B}_{10}\text{Br}_9\text{S}(n\text{-Bu})_2]$

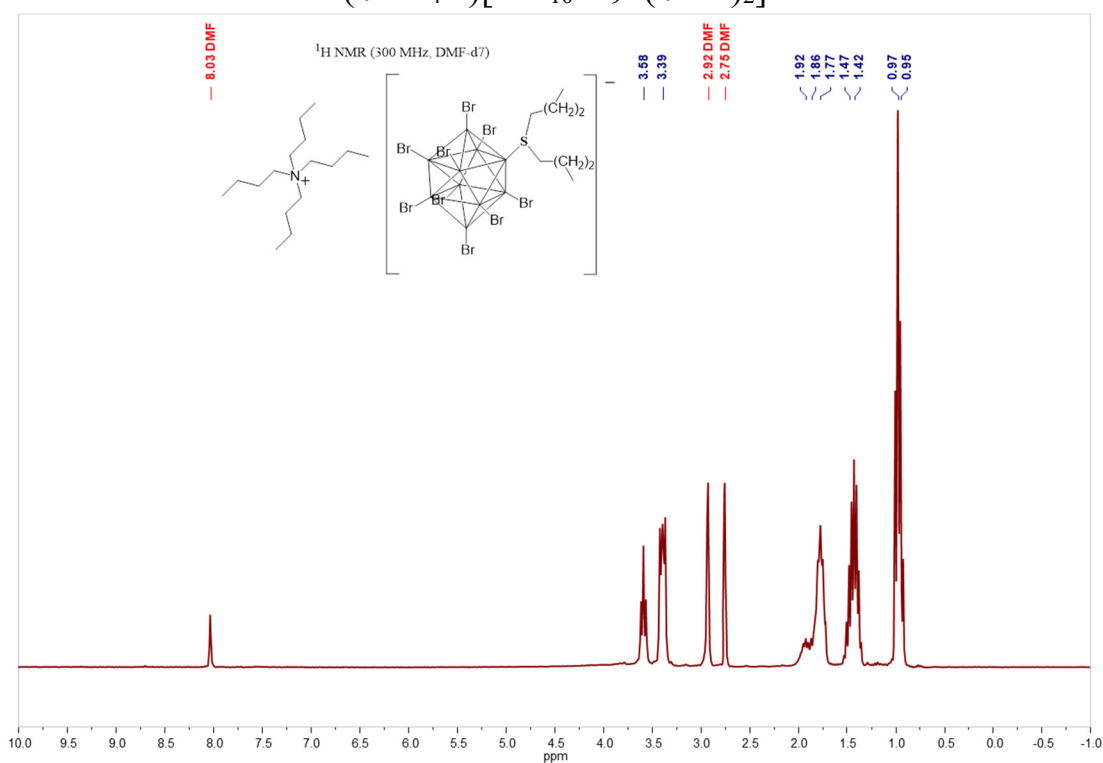

**Figure S20.**  $^1\text{H}$  NMR spectrum (DMF- $d_7$ , 300.3 MHz) of  $(n\text{-Bu}_4\text{N})[2\text{-B}_{10}\text{Br}_9\text{S}(n\text{-Bu})_2]$

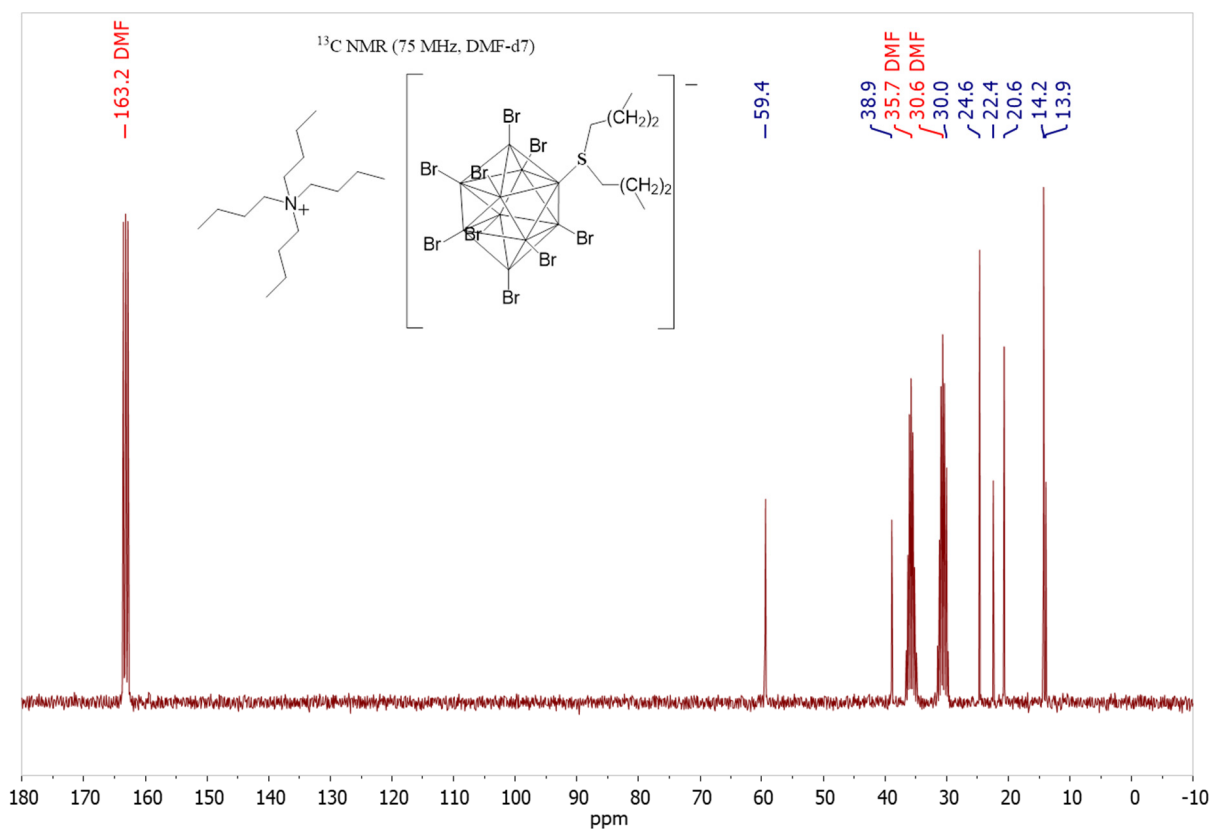

**Figure S21.** <sup>13</sup>C NMR spectrum (DMF-d<sub>7</sub>, 75.49 MHz) of  $(n\text{-Bu}_4\text{N})[2\text{-B}_{10}\text{Br}_9\text{S}(n\text{-Bu})_2]$

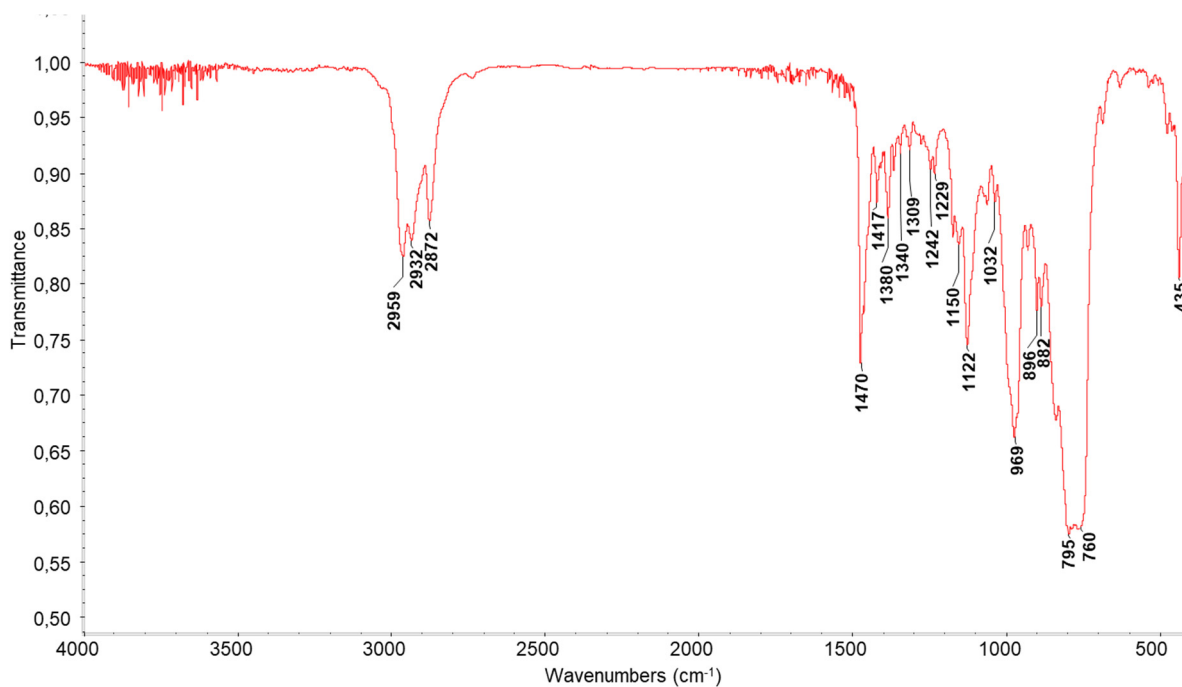

**Figure S22.** IR spectra (in CCl<sub>4</sub>) of  $(n\text{-Bu}_4\text{N})[2\text{-B}_{10}\text{Br}_9\text{S}(n\text{-Bu})_2]$

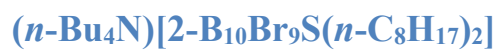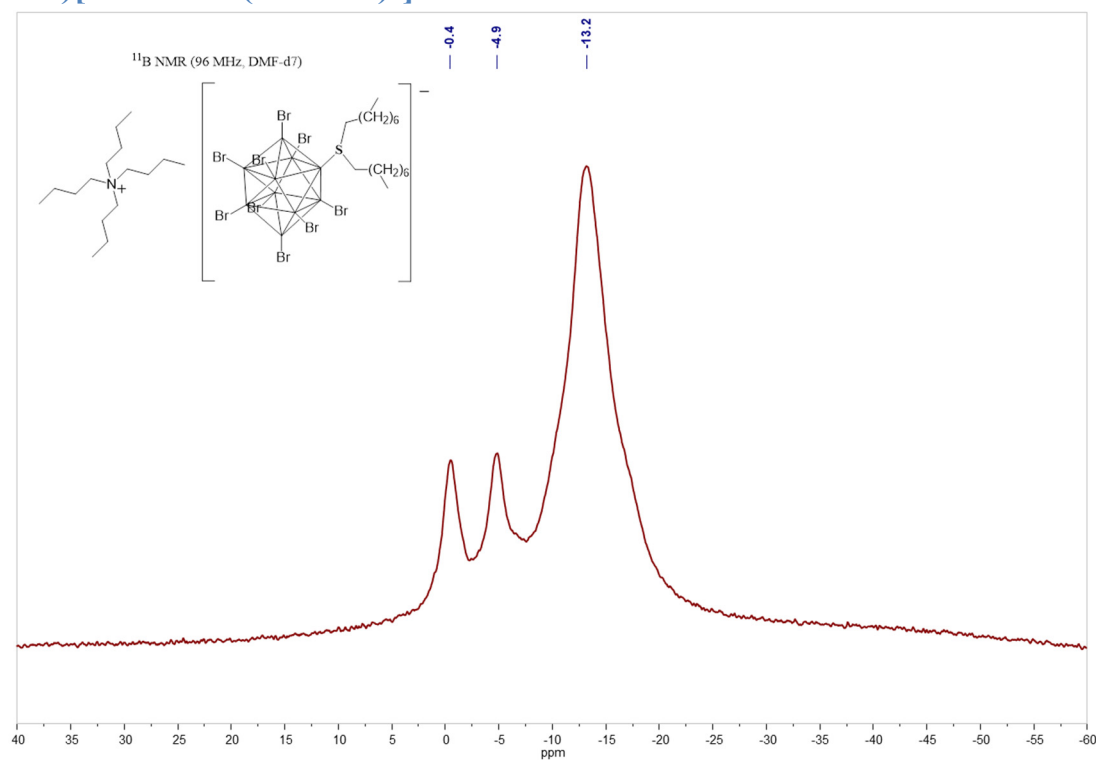

**Figure S23.**  $^{11}\text{B}$  NMR spectrum (DMF- $d_7$ , 96.32 MHz) of  $(n\text{-Bu}_4\text{N})[2\text{-B}_{10}\text{Br}_9\text{S}(n\text{-C}_8\text{H}_{17})_2]$

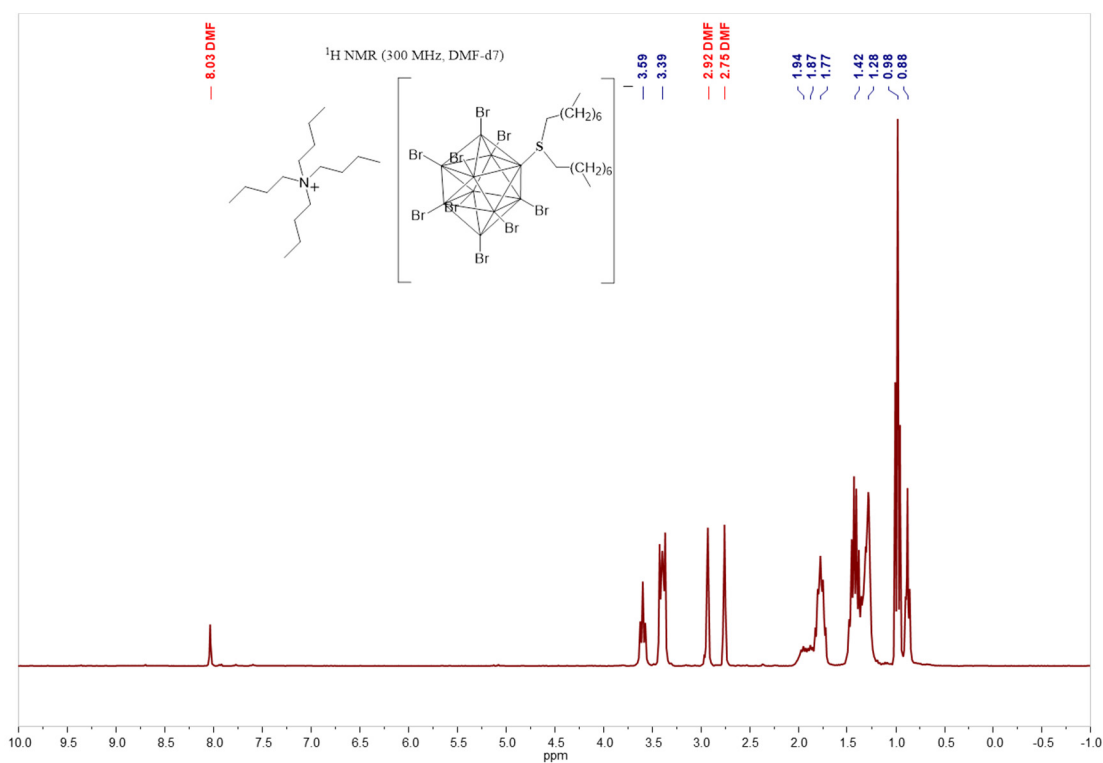

**Figure S24.**  $^1\text{H}$  NMR spectrum (DMF- $d_7$ , 300.3 MHz) of  $(n\text{-Bu}_4\text{N})[2\text{-B}_{10}\text{Br}_9\text{S}(n\text{-C}_8\text{H}_{17})_2]$



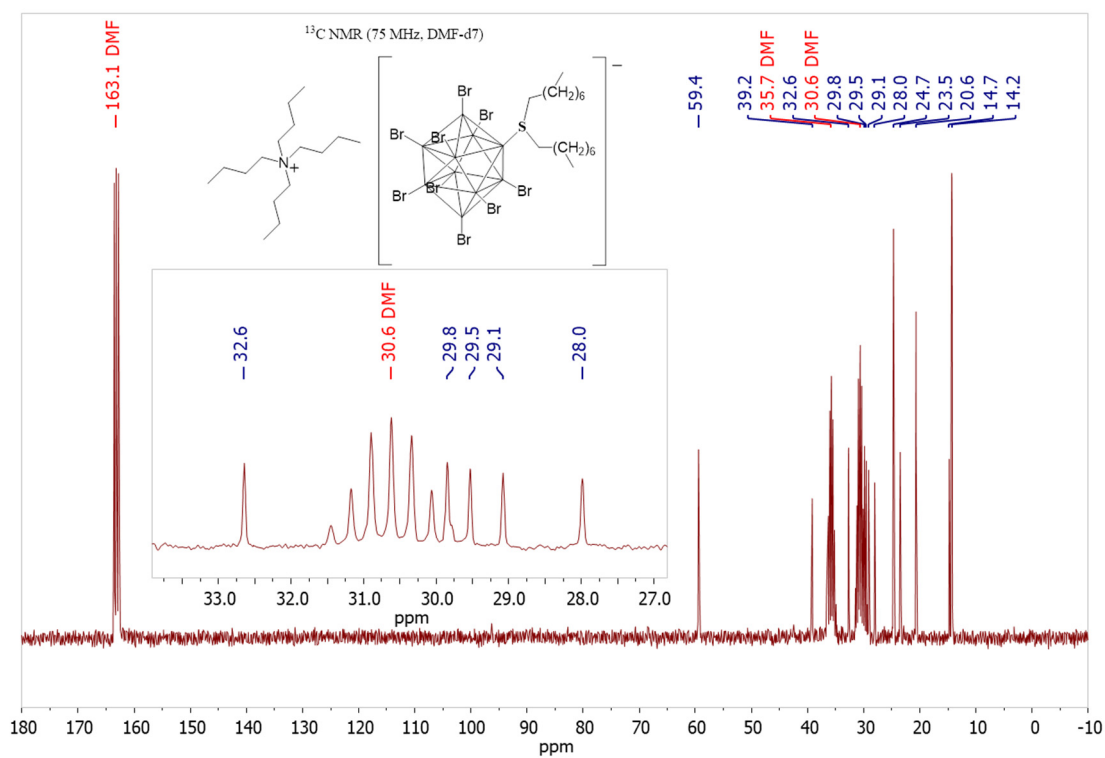

**Figure S25.** <sup>13</sup>C NMR spectrum (DMF-d<sub>7</sub>, 75.49 MHz) of  $(n\text{-Bu}_4\text{N})[2\text{-B}_{10}\text{Br}_9\text{S}(\text{n-C}_8\text{H}_{17})_2]$

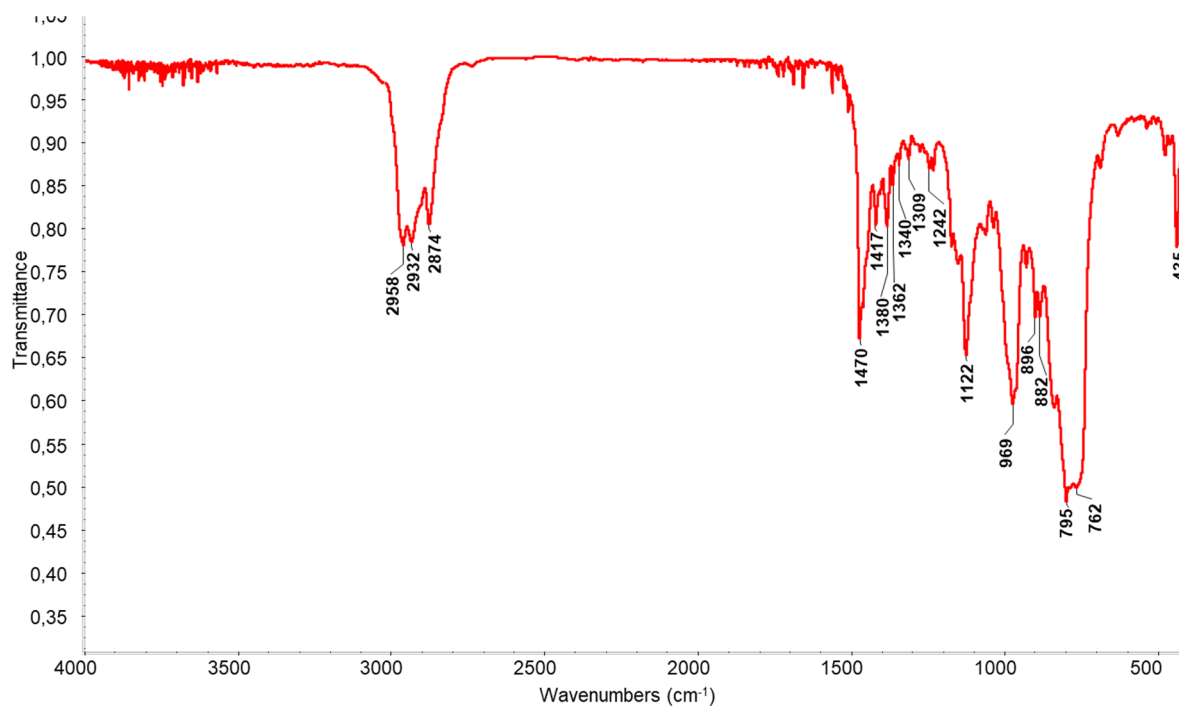

**Figure S26.** IR spectra (in CCl<sub>4</sub>) of  $(n\text{-Bu}_4\text{N})[2\text{-B}_{10}\text{Br}_9\text{S}(\text{n-C}_8\text{H}_{17})_2]$

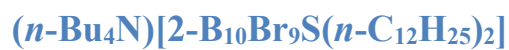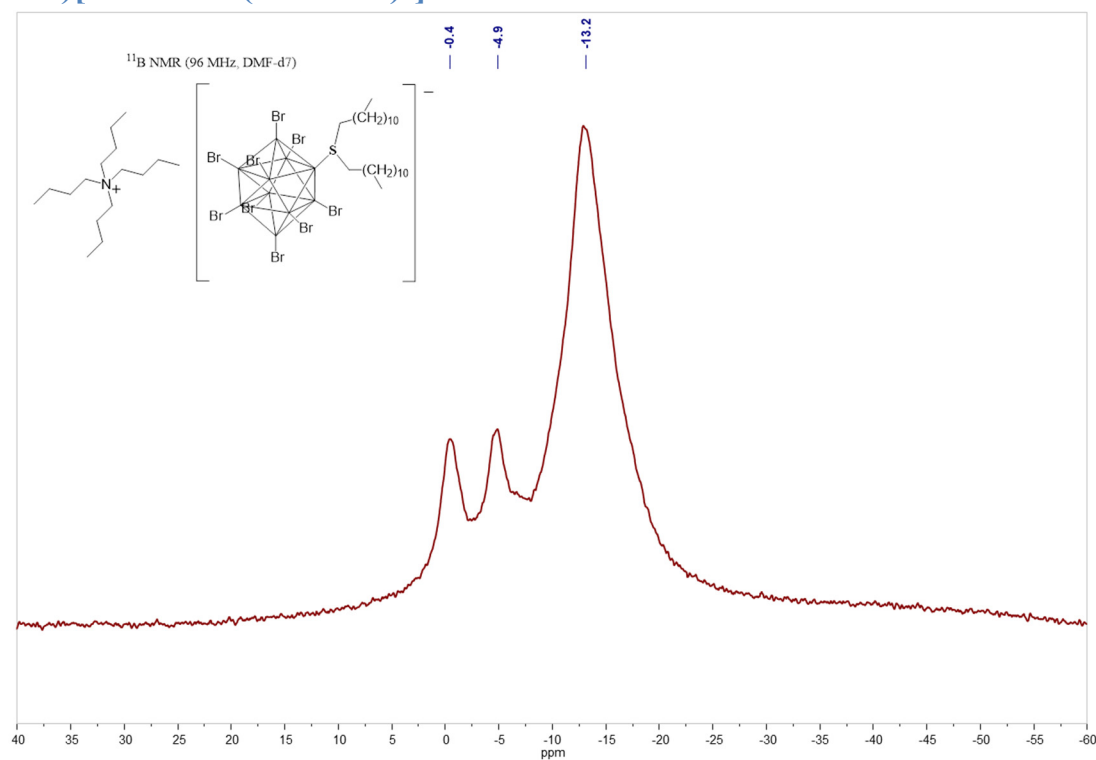

**Figure S27.**  $^{11}\text{B}$  NMR spectrum (DMF- $d_7$ , 96.32 MHz) of  $(n\text{-Bu}_4\text{N})[2\text{-B}_{10}\text{Br}_9\text{S}(n\text{-C}_{12}\text{H}_{25})_2]$

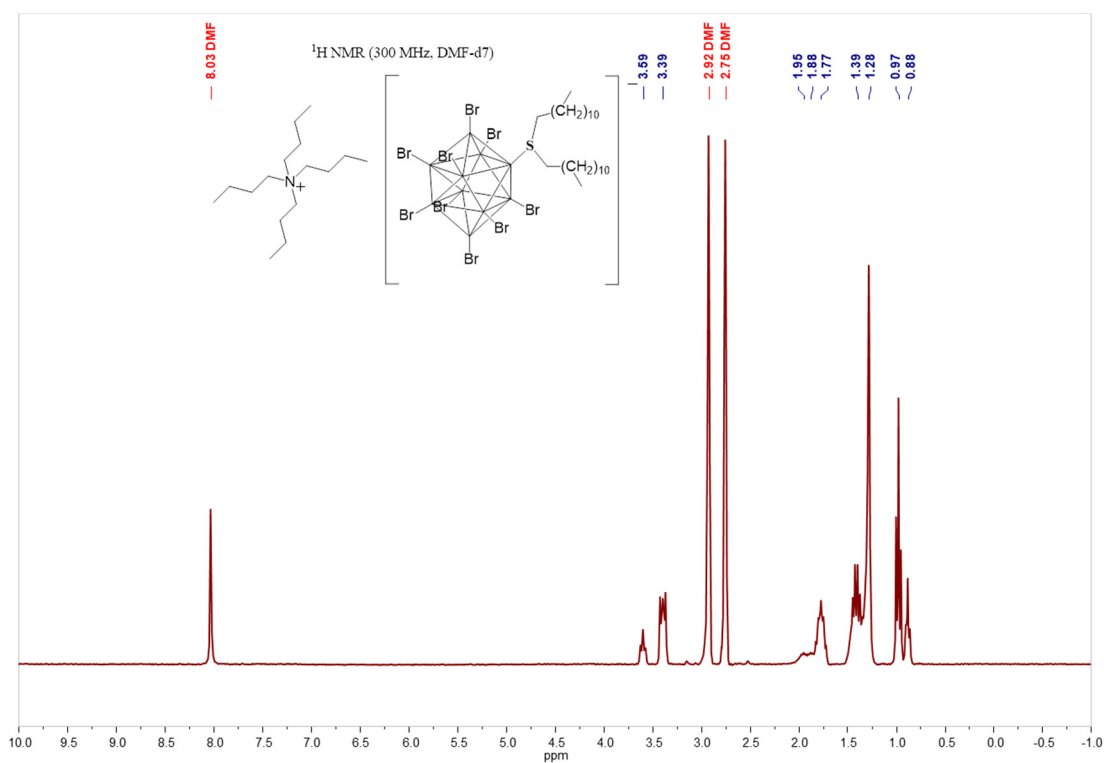

**Figure S28.**  $^1\text{H}$  NMR spectrum (DMF- $d_7$ , 300.3 MHz) of  $(n\text{-Bu}_4\text{N})[2\text{-B}_{10}\text{Br}_9\text{S}(n\text{-C}_{12}\text{H}_{25})_2]$

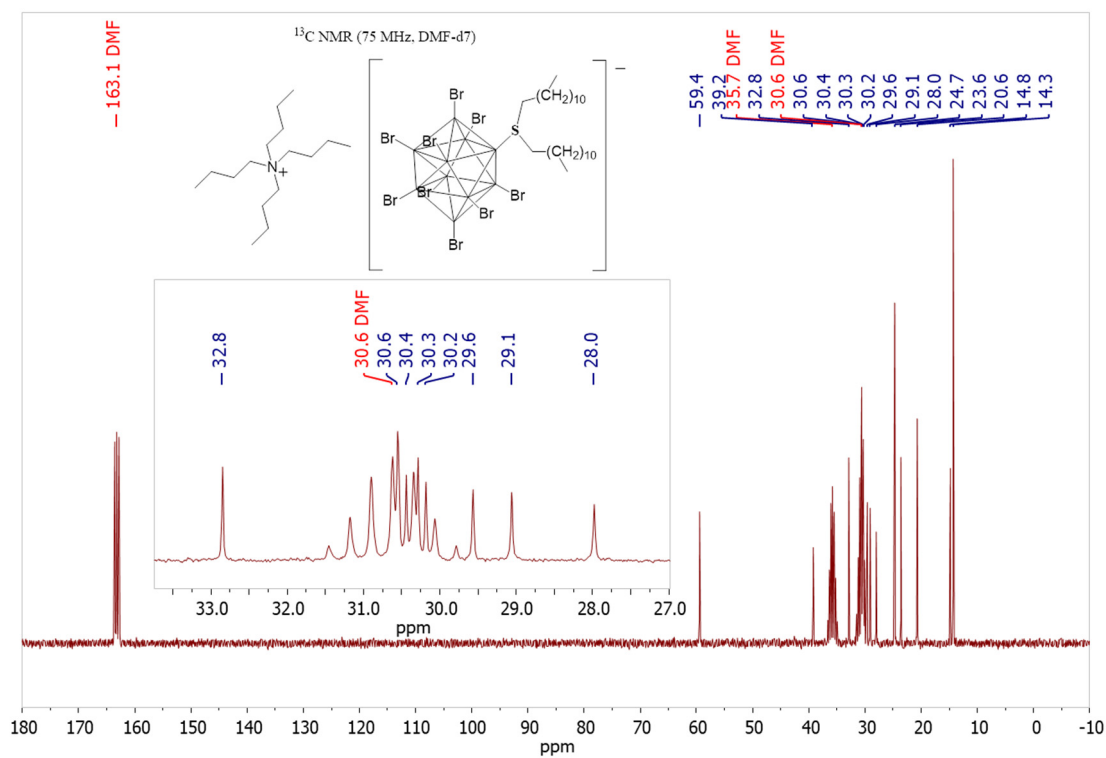

**Figure S29.** <sup>13</sup>C NMR spectrum (DMF-d<sub>7</sub>, 75.49 MHz) of (n-Bu<sub>4</sub>N)[2-B<sub>10</sub>Br<sub>9</sub>S(n-C<sub>12</sub>H<sub>25</sub>)<sub>2</sub>]

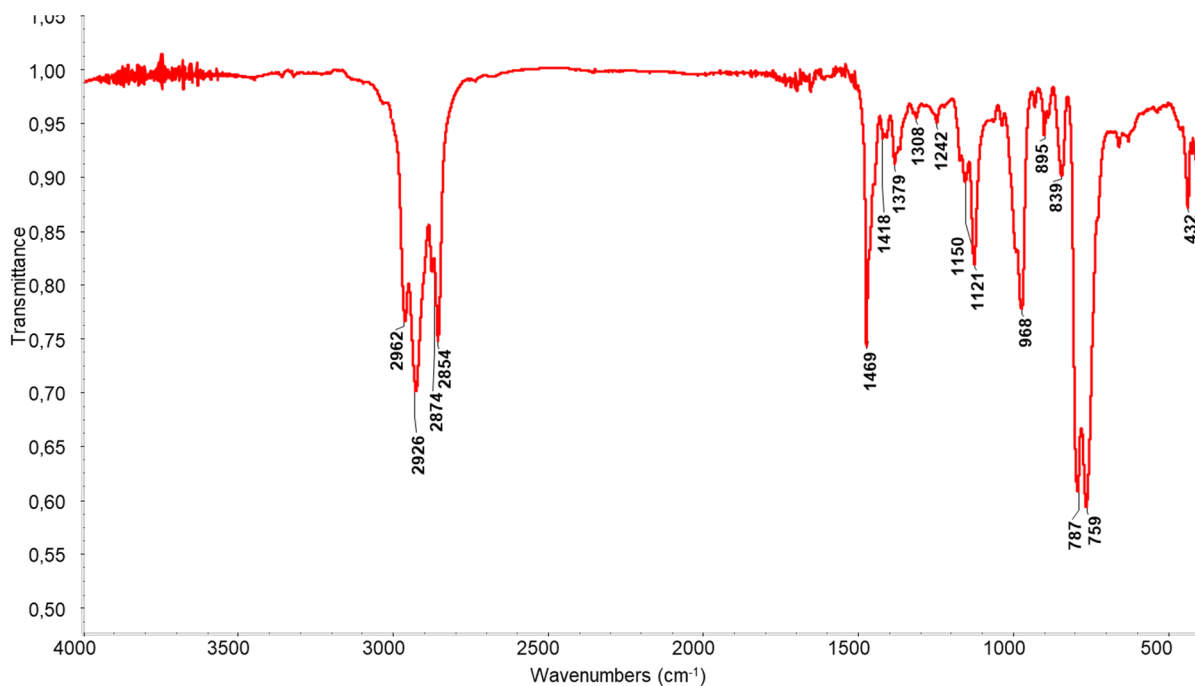

**Figure S30.** IR spectra (in CCl<sub>4</sub>) of (n-Bu<sub>4</sub>N)[2-B<sub>10</sub>Br<sub>9</sub>S(n-C<sub>12</sub>H<sub>25</sub>)<sub>2</sub>]

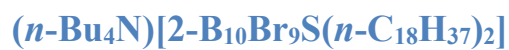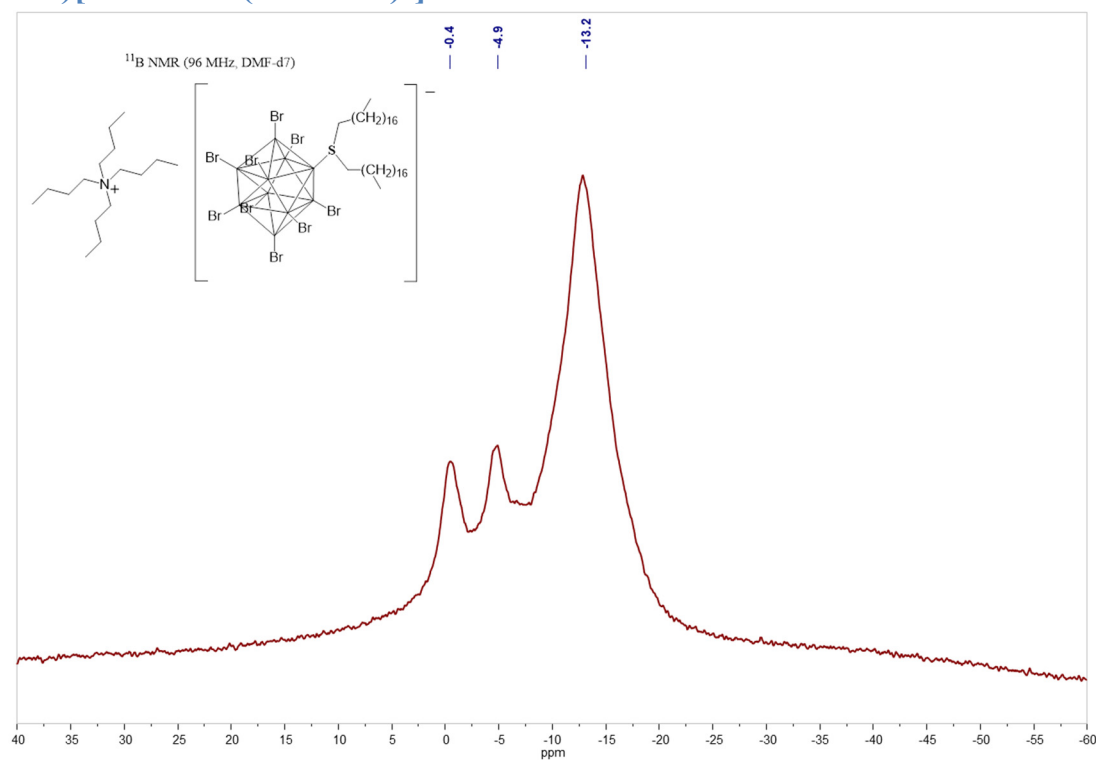

**Figure S31.**  $^{11}\text{B}$  NMR spectrum (DMF- $d_7$ , 96.32 MHz) of  $(n\text{-Bu}_4\text{N})[2\text{-B}_{10}\text{Br}_9\text{S}(n\text{-C}_{18}\text{H}_{37})_2]$

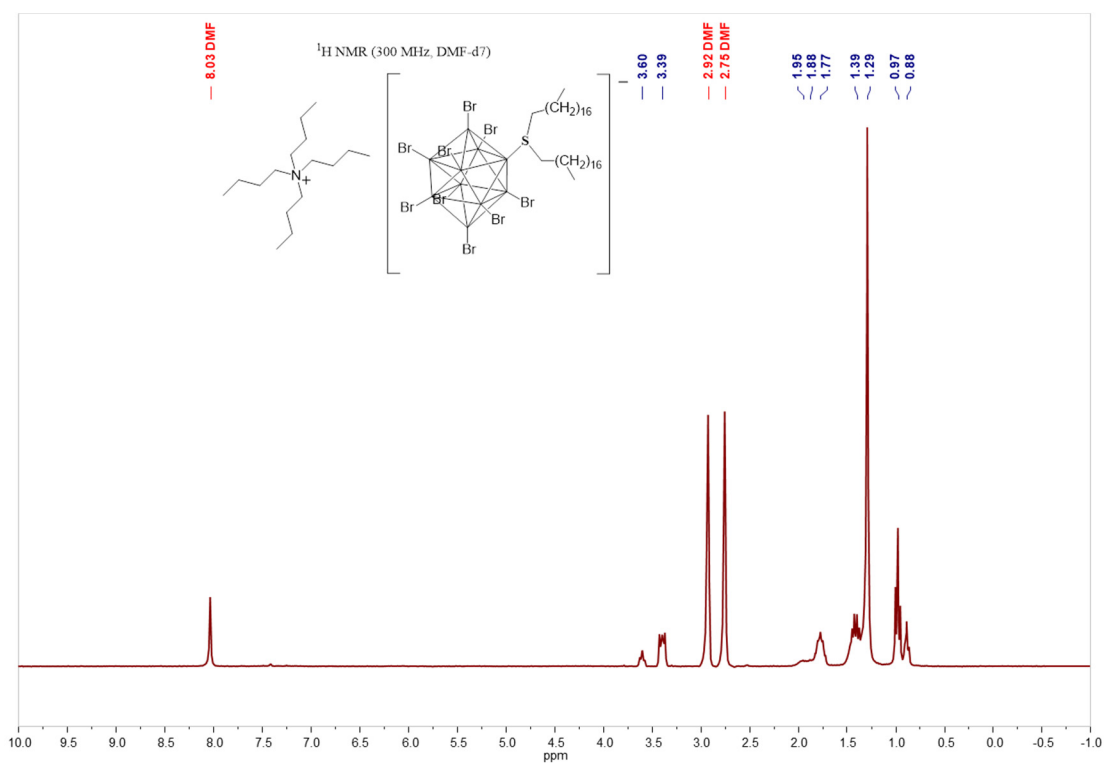

**Figure S32.**  $^1\text{H}$  NMR spectrum (DMF- $d_7$ , 300.3 MHz) of  $(n\text{-Bu}_4\text{N})[2\text{-B}_{10}\text{Br}_9\text{S}(n\text{-C}_{18}\text{H}_{37})_2]$

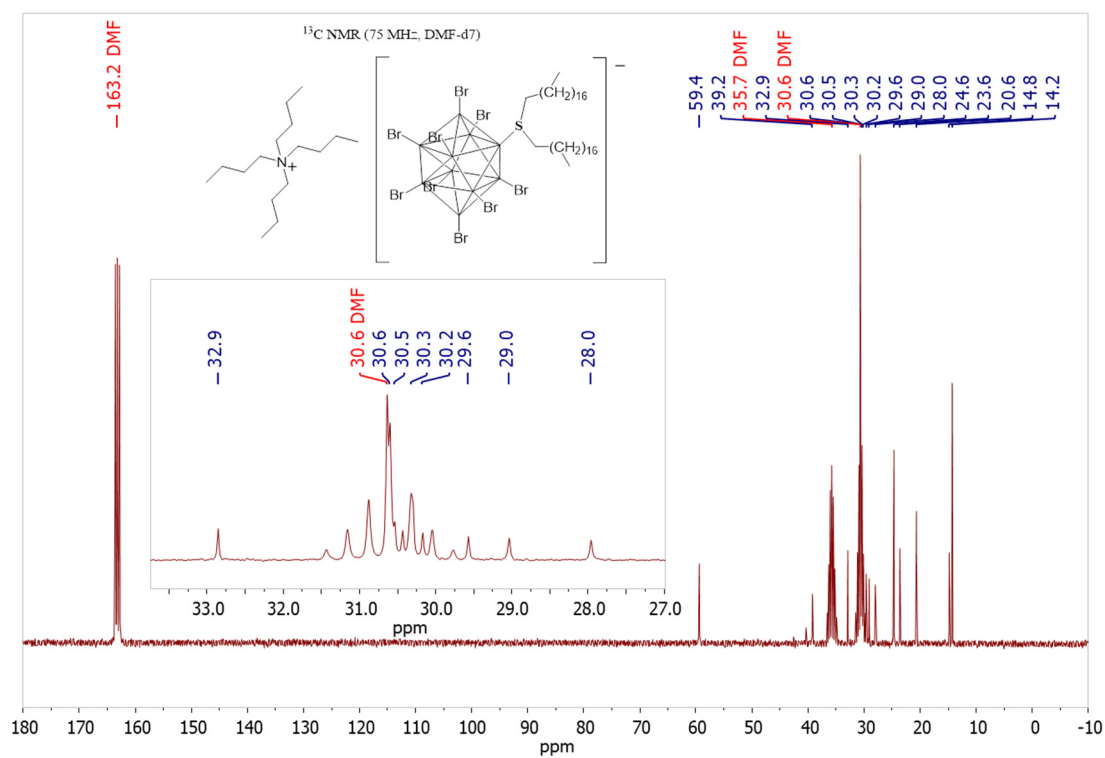

**Figure S33.** <sup>13</sup>C NMR spectrum (DMF-d<sub>7</sub>, 75.49 MHz) of  $(n\text{-Bu}_4\text{N})[2\text{-B}_{10}\text{Br}_9\text{S}(n\text{-C}_{18}\text{H}_{37})_2]$

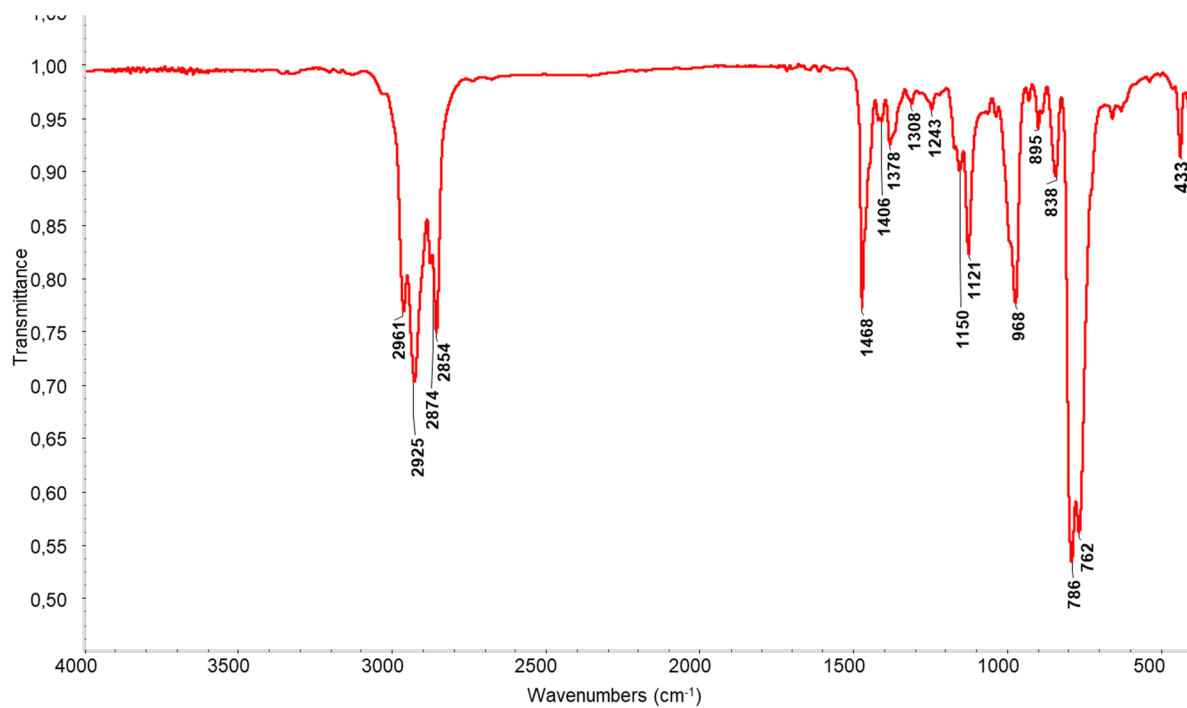

**Figure S34.** IR spectra (in CCl<sub>4</sub>) of  $(n\text{-Bu}_4\text{N})[2\text{-B}_{10}\text{Br}_9\text{S}(n\text{-C}_{18}\text{H}_{37})_2]$
