# Supplementary material for: Non-Covalent Interactions in the Crystal Structures of Perbrominated Sulfonium Derivatives of the closo-Decaborate Anion
Source: MDPI journal article supplement (doi:10.3390/ijms231912022), 2022-10-10
Supplement: s1 [file s1]

# Supplementary information

## Part 2

### Non-covalent Interactions in the Crystal Structures of Perbrominated Sulfonium Derivatives of the *closo*-Decaborate Anion

Aleksei V. Golubev <sup>1,\*</sup>, Alexey S. Kubasov <sup>1,\*</sup>, Alexander Yu. Bykov <sup>1</sup>, Andrey P. Zhdanov <sup>1</sup>, Alexander A. Korlyukov <sup>2</sup>, Konstantin Yu. Zhizhin <sup>1</sup> and Nikolay T. Kuznetsov <sup>1</sup>

<sup>1</sup> Kurnakov Institute of General and Inorganic Chemistry, Russian Academy of Sciences, 31 Leninsky Prosp., 119071 Moscow, Russia

<sup>2</sup> A.N. Nesmeyanov Institute of Organoelement Compounds, Russian Academy of Sciences, 28 Vavilova Str., 119991 Moscow, Russia

\* Correspondence: golalekseival@mail.ru (A.V.G.), fobosax@mail.ru (A.S.K.)

## Contents

|                                                                                                                                                                                          |    |
|------------------------------------------------------------------------------------------------------------------------------------------------------------------------------------------|----|
| Quantum calculations .....                                                                                                                                                               | 3  |
| Optimized cell vectors and atomic coordinates of<br>( <i>n</i> -Bu <sub>4</sub> N)[2-B <sub>10</sub> Br <sub>9</sub> S( <i>i</i> -Pr) <sub>2</sub> ] .....                               | 3  |
| Optimized cell vectors and atomic coordinates of<br>( <i>n</i> -Bu <sub>4</sub> N)[2-B <sub>10</sub> Br <sub>9</sub> S( <i>n</i> -Bu) <sub>2</sub> ] .....                               | 8  |
| Optimized cell vectors and atomic coordinates of<br>( <i>n</i> -Bu <sub>4</sub> N)[2-B <sub>10</sub> Br <sub>9</sub> S( <i>n</i> -C <sub>12</sub> H <sub>25</sub> ) <sub>2</sub> ] ..... | 13 |
| Optimized cell vectors and atomic coordinates of<br>( <i>n</i> -Bu <sub>4</sub> N)[2-B <sub>10</sub> Br <sub>9</sub> S( <i>n</i> -C <sub>18</sub> H <sub>37</sub> ) <sub>2</sub> ] ..... | 27 |

Quantum calculations

Optimized cell vectors and atomic coordinates of (n-Bu<sub>4</sub>N)[2-B<sub>10</sub>Br<sub>9</sub>S(*i*-Pr)<sub>2</sub>]

|                     |                     |                     |
|---------------------|---------------------|---------------------|
| 10.4815259379371657 | 4.7936246048644771  | 3.2533457535912507  |
| -0.0143583649188891 | 11.8004927976811107 | 4.0546731039938644  |
| -0.0772236483799104 | -0.0695486933755317 | 15.8044911492166236 |

|    |   |   |    |    |     |
|----|---|---|----|----|-----|
| Br | S | N | C  | B  | H   |
| 18 | 2 | 2 | 44 | 20 | 100 |

Direct

|                    |                    |                    |
|--------------------|--------------------|--------------------|
| 0.4374086347134721 | 0.4139685382554817 | 0.0861482207154315 |
| 0.5625913652865278 | 0.5860314617445175 | 0.9138517792845686 |
| 0.1979294118718231 | 0.5409852088148849 | 0.2724544279302022 |
| 0.8020705881281699 | 0.4590147911851152 | 0.7275455720697979 |
| 0.1291900860330855 | 0.4011363756728886 | 0.0871400950633686 |
| 0.8708099139669141 | 0.5988636243271120 | 0.9128599049366316 |
| 0.4054913534756738 | 0.0776677496949635 | 0.0923696585409196 |
| 0.5945086465243264 | 0.9223322503050371 | 0.9076303414590795 |
| 0.4907018221616365 | 0.2803259156259330 | 0.3734381278470787 |
| 0.5092981778383635 | 0.7196740843740671 | 0.6265618721529210 |
| 0.4634664345618252 | 0.9374127958939390 | 0.3854246082218785 |
| 0.5365335654381745 | 0.0625872041060609 | 0.6145753917781214 |
| 0.6664635777257243 | 0.0743646770462123 | 0.1931711614364432 |
| 0.3335364222742758 | 0.9256353229537884 | 0.8068288385635574 |
| 0.1497994321464953 | 0.0545037957172208 | 0.2863750701083793 |
| 0.8502005678535048 | 0.9454962042827793 | 0.7136249298916207 |
| 0.9552732518896034 | 0.4045083090582878 | 0.3209730724737215 |
| 0.0447267481103969 | 0.5954916909417126 | 0.6790269275262789 |
| 0.2417644762055892 | 0.1661202007354428 | 0.4877148156229903 |
| 0.7582355237944118 | 0.8338797992645579 | 0.5122851843770091 |
| 0.4340846782712533 | 0.3596428488333162 | 0.7996906564814132 |
| 0.5659153217287469 | 0.6403571511666835 | 0.2003093435185869 |
| 0.1967894427013228 | 0.3897436454397230 | 0.5143766080768563 |
| 0.8032105572986774 | 0.6102563545602763 | 0.4856233919231365 |
| 0.1208853346148638 | 0.2482323917680049 | 0.6418677445481479 |
| 0.8791146653851359 | 0.7517676082319954 | 0.3581322554518455 |
| 0.1356928285186720 | 0.2989569025030379 | 0.5400550283160310 |
| 0.8643071714813279 | 0.7010430974969625 | 0.4599449716839686 |

|                    |                    |                    |
|--------------------|--------------------|--------------------|
| 0.1507462764635742 | 0.0687217324994219 | 0.5141982035880726 |
| 0.8492537235364255 | 0.9312782675005782 | 0.4858017964119273 |
| 0.0078120410442150 | 0.1426647447051400 | 0.5167762628942439 |
| 0.9921879589557850 | 0.8573352552948602 | 0.4832237371057486 |
| 0.1893132325113588 | 0.9680298431099318 | 0.5995085395835624 |
| 0.8106867674886410 | 0.0319701568900607 | 0.4004914604164374 |
| 0.3450613592221361 | 0.4967529702287932 | 0.7755815120863222 |
| 0.6549386407778647 | 0.5032470297712069 | 0.2244184879136784 |
| 0.5379614684378218 | 0.3452107944166246 | 0.8464285943668526 |
| 0.4620385315621785 | 0.6547892055833755 | 0.1535714056331476 |
| 0.3637362763023045 | 0.2837145618872805 | 0.8641937373807719 |
| 0.6362637236976952 | 0.7162854381127184 | 0.1358062626192273 |
| 0.2641293189192019 | 0.5560490219092045 | 0.8538564473977429 |
| 0.7358706810807986 | 0.4439509780907953 | 0.1461435526022576 |
| 0.6515564897658560 | 0.2194909615452488 | 0.8554384500295014 |
| 0.3484435102341447 | 0.7805090384547499 | 0.1445615499704988 |
| 0.4908237351086718 | 0.3120156890516774 | 0.7142251396059575 |
| 0.5091762648913287 | 0.6879843109483220 | 0.2857748603940425 |
| 0.2505640994056272 | 0.2913480992440629 | 0.8326825620179502 |
| 0.7494359005943726 | 0.7086519007559368 | 0.1673174379820501 |
| 0.5701203093443959 | 0.3744283426126951 | 0.6444809119952124 |
| 0.4298796906556039 | 0.6255716573873057 | 0.3555190880047877 |
| 0.7291332288714725 | 0.2011012740448669 | 0.9258027754470207 |
| 0.2708667711285275 | 0.7988987259551334 | 0.0741972245529795 |
| 0.1896142161465516 | 0.2127358451470091 | 0.9070413339687854 |
| 0.8103857838534487 | 0.7872641548529907 | 0.0929586660312153 |
| 0.1943578644655606 | 0.6967463675890716 | 0.8184289594294021 |
| 0.8056421355344394 | 0.3032536324109290 | 0.1815710405705983 |
| 0.6224816476891538 | 0.3173192701153864 | 0.5622266623317058 |
| 0.3775183523108464 | 0.6826807298846140 | 0.4377733376682941 |
| 0.0707517838568958 | 0.2208400057287171 | 0.8826437450429337 |
| 0.9292482161431046 | 0.7791599942712824 | 0.1173562549570664 |
| 0.8464822607849268 | 0.0775066010732481 | 0.9324108698678752 |
| 0.1535177392150733 | 0.9224933989267591 | 0.0675891301321243 |
| 0.1116753597701297 | 0.7619425028439266 | 0.8941033820716384 |
| 0.8883246402298706 | 0.2380574971560737 | 0.1058966179283615 |
| 0.6960325278848045 | 0.3820072310706846 | 0.4878231794309442 |
| 0.3039674721151959 | 0.6179927689293162 | 0.5121768205690564 |
| 0.3871423703656766 | 0.1042135141539394 | 0.3081159396325987 |
| 0.6128576296343234 | 0.8957864858460609 | 0.6918840603674014 |
| 0.1377348942460618 | 0.3114606565806451 | 0.2949811583899031 |
| 0.8622651057539379 | 0.6885393434193551 | 0.7050188416100973 |
| 0.3641587619221101 | 0.1623515613865309 | 0.1887786370737987 |
| 0.6358412380778901 | 0.8376484386134688 | 0.8112213629262019 |

|                    |                    |                    |
|--------------------|--------------------|--------------------|
| 0.4849519732375865 | 0.1587736857993814 | 0.2276277542631802 |
| 0.5150480267624140 | 0.8412263142006191 | 0.7723722457368203 |
| 0.2502899433869002 | 0.3667659209126951 | 0.2718611145916026 |
| 0.7497100566131001 | 0.6332340790873049 | 0.7281388854083978 |
| 0.3787357033684611 | 0.3028763519459505 | 0.1855852096408513 |
| 0.6212642966315384 | 0.6971236480540506 | 0.8144147903591492 |
| 0.2285065094792080 | 0.1667409774424461 | 0.2757766730935394 |
| 0.7714934905207926 | 0.8332590225575545 | 0.7242233269064607 |
| 0.4012820248270797 | 0.2466105516692506 | 0.3042359372022237 |
| 0.5987179751729199 | 0.7533894483307491 | 0.6957640627977684 |
| 0.2552472192371404 | 0.2238685971439833 | 0.3593778168052422 |
| 0.7447527807628664 | 0.7761314028560167 | 0.6406221831947582 |
| 0.2230237309117319 | 0.3079653429092184 | 0.1905768236234855 |
| 0.7769762690882679 | 0.6920346570907815 | 0.8094231763765151 |
| 0.2892231879368114 | 0.3457095523301827 | 0.5390465495463843 |
| 0.7107768120631887 | 0.6542904476698175 | 0.4609534504536157 |
| 0.1335876834587948 | 0.4669787940261447 | 0.5472959034616720 |
| 0.8664123165412053 | 0.5330212059738545 | 0.4527040965383283 |
| 0.2107402349012967 | 0.4278575993879236 | 0.4416708657319343 |
| 0.7892597650987035 | 0.5721424006120773 | 0.5583291342680663 |
| 0.0630151298571461 | 0.1947514450433296 | 0.6650686716158729 |
| 0.9369848701428536 | 0.8052485549566704 | 0.3349313283841274 |
| 0.0734089711011162 | 0.3272609756192569 | 0.6742147951594339 |
| 0.9265910288988836 | 0.6727390243807428 | 0.3257852048405657 |
| 0.2143120864598441 | 0.1885096343500861 | 0.6650859838525350 |
| 0.7856879135401559 | 0.8114903656499136 | 0.3349140161474654 |
| 0.0447900154022125 | 0.3422687690120771 | 0.5133351794551938 |
| 0.9552099845977874 | 0.6577312309879232 | 0.4866648205448065 |
| 0.1901382835788279 | 0.0258123980903599 | 0.4558990713777132 |
| 0.8098617164211730 | 0.9741876019096397 | 0.5441009286222865 |
| 0.9657111425064342 | 0.1938927281735164 | 0.5704647015703281 |
| 0.0342888574935659 | 0.8061072718264840 | 0.4295352984296729 |
| 0.9648538843772804 | 0.0763688655593833 | 0.5327100315886978 |
| 0.0351461156227201 | 0.9236311344406161 | 0.4672899684113028 |
| 0.9811603636413718 | 0.2076406403245820 | 0.4524373839234992 |
| 0.0188396363586285 | 0.7923593596754180 | 0.5475626160765004 |
| 0.2928223506358771 | 0.9192400194910554 | 0.5973772060469337 |
| 0.7071776493641233 | 0.0807599805089446 | 0.4026227939530664 |
| 0.1520734143130503 | 0.8997567390035064 | 0.6058971990351780 |
| 0.8479265856869497 | 0.1002432609964933 | 0.3941028009648216 |
| 0.1496175212979541 | 0.0043272604153469 | 0.6606054786132931 |
| 0.8503824787020455 | 0.9956727395846531 | 0.3393945213867067 |
| 0.2842276031178338 | 0.5050996938777285 | 0.7306470996512177 |
| 0.7157723968821659 | 0.4949003061222721 | 0.2693529003487825 |

|                    |                    |                    |
|--------------------|--------------------|--------------------|
| 0.4059839460940489 | 0.5446511701679618 | 0.7364497931445820 |
| 0.5940160539059507 | 0.4553488298320384 | 0.2635502068554183 |
| 0.5680749836886184 | 0.4201351431467848 | 0.8087974467861980 |
| 0.4319250163113816 | 0.5798648568532146 | 0.1912025532138022 |
| 0.4909844240773351 | 0.3632774756995449 | 0.9132316911144014 |
| 0.5090155759226636 | 0.6367225243004622 | 0.0867683088856056 |
| 0.4351976936541824 | 0.1871178914930048 | 0.8773864902318357 |
| 0.5648023063458184 | 0.8128821085069949 | 0.1226135097681639 |
| 0.3337104331884947 | 0.3149951138035167 | 0.9272263600709900 |
| 0.6662895668115055 | 0.6850048861964839 | 0.0727736399290103 |
| 0.1939200448725217 | 0.5173387878841257 | 0.8891780297944928 |
| 0.8060799551274779 | 0.4826612121158745 | 0.1108219702055070 |
| 0.3230286835289208 | 0.5387920942620053 | 0.9036783115521391 |
| 0.6769713164710792 | 0.4612079057379953 | 0.0963216884478611 |
| 0.6216224157044625 | 0.1428614851281474 | 0.8758397864981138 |
| 0.3783775842955376 | 0.8571385148718526 | 0.1241602135018859 |
| 0.7132198773059842 | 0.2106871389953524 | 0.7902162128006388 |
| 0.2867801226940153 | 0.7893128610046477 | 0.2097837871993609 |
| 0.4101622952971263 | 0.3250085782727815 | 0.6856543845759980 |
| 0.5898377047028662 | 0.6749914217272186 | 0.3143456154240025 |
| 0.5472804486819911 | 0.2114567188951439 | 0.7350599380815785 |
| 0.4527195513180092 | 0.7885432811048559 | 0.2649400619184213 |
| 0.1786846923576070 | 0.3879426255927312 | 0.8173491369722173 |
| 0.8213153076423930 | 0.6120573744072679 | 0.1826508630277830 |
| 0.2798656389719704 | 0.2562458923368326 | 0.7711202834060633 |
| 0.7201343610280221 | 0.7437541076631737 | 0.2288797165939367 |
| 0.5129120617238547 | 0.4748002968643595 | 0.6226386540118966 |
| 0.4870879382761386 | 0.5251997031356336 | 0.3773613459881036 |
| 0.6495460260844576 | 0.3652653619650514 | 0.6726929255077636 |
| 0.3504539739155493 | 0.6347346380349488 | 0.3273070744922372 |
| 0.6684998728358351 | 0.2039785659273510 | 0.9916956304824173 |
| 0.3315001271641649 | 0.7960214340726486 | 0.0083043695175825 |
| 0.7570522541696117 | 0.2788502715420626 | 0.9089810607423322 |
| 0.2429477458303883 | 0.7211497284579367 | 0.0910189392576676 |
| 0.2603078934558980 | 0.1152620192252832 | 0.9203921257668004 |
| 0.7396921065441019 | 0.8847379807747169 | 0.0796078742331996 |
| 0.1656884913027703 | 0.2436382522383705 | 0.9699337165061592 |
| 0.8343115086972295 | 0.7563617477616292 | 0.0300662834938410 |
| 0.1347586035523972 | 0.7149955245026215 | 0.7686260358132349 |
| 0.8652413964476029 | 0.2850044754973787 | 0.2313739641867653 |
| 0.2648478697267241 | 0.7352494268114842 | 0.7828865707419957 |
| 0.7351521302732827 | 0.2647505731885157 | 0.2171134292580038 |
| 0.6837794302007375 | 0.2175183345809095 | 0.5828670883413387 |
| 0.3162205697992626 | 0.7824816654190906 | 0.4171329116586620 |

|                     |                     |                    |
|---------------------|---------------------|--------------------|
| 0.5432636146065253  | 0.3220619774084905  | 0.5360418514351946 |
| 0.4567363853934746  | 0.6779380225915096  | 0.4639581485648053 |
| 0.0937552154245135  | 0.1824068881605712  | 0.8235522466043654 |
| 0.9062447845754864  | 0.8175931118394287  | 0.1764477533956349 |
| -0.0004825702925502 | 0.3176505530523472  | 0.8672719217343809 |
| 0.0004825702925502  | 0.6823494469476536  | 0.1327280782656196 |
| 0.0262955404694421  | 0.1680531331990189  | 0.9384017318718850 |
| 0.9737044595305581  | 0.8319468668009817  | 0.0615982681281221 |
| 0.9143420091736355  | 0.0764322264004062  | 0.8698494792757037 |
| 0.0856579908263642  | 0.9235677735995945  | 0.1301505207242955 |
| 0.8203119899594953  | -0.0001101732962666 | 0.9442595030078235 |
| 0.1796880100405054  | 0.0001101732962672  | 0.0557404969921768 |
| 0.8963006584100399  | 0.0594458737127134  | 0.9879413956170833 |
| 0.1036993415899600  | 0.9405541262872933  | 0.0120586043829166 |
| 0.0634215550079322  | 0.8628287612919573  | 0.8680012527067154 |
| 0.9365784449920679  | 0.1371712387080424  | 0.1319987472932845 |
| 0.1694047638667102  | 0.7457145674525248  | 0.9443259632826950 |
| 0.8305952361332894  | 0.2542854325474745  | 0.0556740367173045 |
| 0.0378213411650584  | 0.7278603245999840  | 0.9286878288172478 |
| 0.9621786588349412  | 0.2721396754000160  | 0.0713121711827523 |
| 0.7323545172460405  | 0.3403454091991161  | 0.4291079841068655 |
| 0.2676454827539599  | 0.6596545908008848  | 0.5708920158931352 |
| 0.7779054980504978  | 0.3753846482060450  | 0.5112682243918523 |
| 0.2220945019495020  | 0.6246153517939551  | 0.4887317756081547 |
| 0.6358458762577204  | 0.4815263179694397  | 0.4652279956669540 |
| 0.3641541237422799  | 0.5184736820305604  | 0.5347720043330455 |

#### FREE ENERGIE OF THE ION-ELECTRON SYSTEM (eV)

Free energy TOTEN = -990.28838433 eV

Energy without entropy = -990.28838433 energy (sigma->0) = -990.28838433

## Optimized cell vectors and atomic coordinates of (n-Bu<sub>4</sub>N)[2-B<sub>10</sub>Br<sub>9</sub>S(n-Bu)<sub>2</sub>]

|                     |                     |                     |
|---------------------|---------------------|---------------------|
| 10.9640810062108169 | -3.6891430788518171 | -4.4962542482120798 |
| -0.0366500996064195 | 12.5143663042954092 | -0.1605650092821645 |
| 0.0411724052161786  | 0.0052137628376594  | 14.8381528645037566 |

| Br | S | N | C  | B  | H   |
|----|---|---|----|----|-----|
| 18 | 2 | 2 | 48 | 20 | 108 |

Direct

|                    |                    |                    |
|--------------------|--------------------|--------------------|
| 0.8691718040067223 | 0.0248538449809152 | 0.3764736196508429 |
| 0.1308281959932771 | 0.9751461550190850 | 0.6235263803491571 |
| 0.5226260632778585 | 0.9327969259865276 | 0.1072639638501526 |
| 0.4773739367221417 | 0.0672030740134719 | 0.8927360361498475 |
| 0.3057147111180826 | 0.7003316563417217 | 0.1728044594476719 |
| 0.6942852888819170 | 0.2996683436582782 | 0.8271955405523284 |
| 0.5091326715931765 | 0.5781724720725474 | 0.1015645371534272 |
| 0.4908673284068306 | 0.4218275279274531 | 0.8984354628465723 |
| 0.8549840746348174 | 0.6743713576612661 | 0.3686390493500326 |
| 0.1450159253651824 | 0.3256286423387346 | 0.6313609506499676 |
| 0.5543470123719970 | 0.0178664486613993 | 0.3647373221207445 |
| 0.4456529876280029 | 0.9821335513386010 | 0.6352626778792552 |
| 0.4394186643234992 | 0.7366265799492856 | 0.4628424373370139 |
| 0.5605813356765006 | 0.2633734200507146 | 0.5371575626629859 |
| 0.5437548480565665 | 0.5125120330296852 | 0.3582766755946835 |
| 0.4562451519434332 | 0.4874879669703150 | 0.6417233244053169 |
| 0.8048223156162135 | 0.8300645924103842 | 0.1409121905529539 |
| 0.1951776843837867 | 0.1699354075896157 | 0.8590878094470459 |
| 0.7970648408136191 | 0.8306189380592750 | 0.5328645881200447 |
| 0.2029351591863809 | 0.1693810619407249 | 0.4671354118799557 |
| 0.7466653271474942 | 0.3174608058410290 | 0.1886898966063158 |
| 0.2533346728525059 | 0.6825391941589710 | 0.8113101033936844 |
| 0.7415148880268272 | 0.7081785103521716 | 0.5892582456816485 |
| 0.2584851119731727 | 0.2918214896478283 | 0.4107417543183514 |
| 0.7664319803922960 | 0.9422012423168903 | 0.5892207074200440 |
| 0.2335680196077040 | 0.0577987576831096 | 0.4107792925799559 |
| 0.8280689417483910 | 0.0695240178201855 | 0.7444030779787376 |
| 0.1719310582516093 | 0.9304759821798141 | 0.2555969220212626 |
| 0.8038831761187644 | 0.5671690556757653 | 0.6986657845541706 |



|                    |                    |                    |
|--------------------|--------------------|--------------------|
| 0.1961168238812357 | 0.4328309443242349 | 0.3013342154458289 |
| 0.8444035816361266 | 0.6615258283989555 | 0.6417118535367099 |
| 0.1555964183638736 | 0.3384741716010441 | 0.3582881464632903 |
| 0.8509926806220613 | 0.9740070786410199 | 0.6961553617450614 |
| 0.1490073193779388 | 0.0259929213589801 | 0.3038446382549391 |
| 0.7852821524032849 | 0.6105509886755676 | 0.7863363072940541 |
| 0.2147178475967154 | 0.3894490113244319 | 0.2136636927059461 |
| 0.8456300330131001 | 0.1752073152200827 | 0.6943503594183205 |
| 0.1543699669868996 | 0.8247926847799175 | 0.3056496405816801 |
| 0.8505837234139709 | 0.2026213720889206 | 0.1233521259856594 |
| 0.1494162765860290 | 0.7973786279110795 | 0.8766478740143406 |
| 0.6252029613755019 | 0.3389717949615022 | 0.1608167603681214 |
| 0.3747970386244979 | 0.6610282050384977 | 0.8391832396318786 |
| 0.7351788900478652 | 0.2293379168871592 | 0.1116874622691742 |
| 0.2648211099521346 | 0.7706620831128411 | 0.8883125377308260 |
| 0.8739756945076991 | 0.4013779102320374 | 0.5520215895909455 |
| 0.1260243054923007 | 0.5986220897679631 | 0.4479784104090548 |
| 0.9352943223935380 | 0.0829518396439099 | 0.0464203433458169 |
| 0.0647056776064621 | 0.9170481603560903 | 0.9535796566541834 |
| 0.8232685034806760 | 0.1140911835308223 | 0.0392357596713297 |
| 0.1767314965193242 | 0.8859088164691775 | 0.9607642403286700 |
| 0.8446531259651623 | 0.4271167745142205 | 0.1956168826483183 |
| 0.1553468740348371 | 0.5728832254857796 | 0.8043831173516816 |
| 0.7812001960349235 | 0.2744232435551020 | 0.2870015903265123 |
| 0.2187998039650765 | 0.7255767564448984 | 0.7129984096734878 |
| 0.4015753450581993 | 0.2651613651379721 | 0.1262758851376691 |
| 0.5984246549418002 | 0.7348386348620279 | 0.8737241148623307 |
| 0.8427048996340279 | 0.3116073614544065 | 0.4681767840324441 |
| 0.1572951003659720 | 0.6883926385455937 | 0.5318232159675564 |
| 0.3000219417040684 | 0.1679698398670715 | 0.1357924220373103 |
| 0.6999780582959320 | 0.8320301601329283 | 0.8642075779626899 |
| 0.7861319295027318 | 0.3503314265929588 | 0.3698722855262430 |
| 0.2138680704972685 | 0.6496685734070415 | 0.6301277144737567 |
| 0.5220909481664665 | 0.2400491184773376 | 0.1648571071366313 |
| 0.4779090518335333 | 0.7599508815226624 | 0.8351428928633686 |
| 0.9472203918033102 | 0.5841526687312718 | 0.1265804385522381 |
| 0.0527796081966895 | 0.4158473312687280 | 0.8734195614477626 |
| 0.8382181419016953 | 0.4761370657247007 | 0.1015351830948010 |
| 0.1617818580983042 | 0.5238629342752998 | 0.8984648169051987 |
| 0.9538036474962025 | 0.6410293722813484 | 0.0379553662487784 |
| 0.0461963525037977 | 0.3589706277186512 | 0.9620446337512213 |
| 0.5286595492412328 | 0.7602832571281827 | 0.3769872806499147 |
| 0.4713404507587669 | 0.2397167428718167 | 0.6230127193500853 |
| 0.5768483507027143 | 0.6687831267680523 | 0.3282919969309182 |

|                    |                     |                    |
|--------------------|---------------------|--------------------|
| 0.4231516492972858 | 0.3312168732319475  | 0.6717080030690815 |
| 0.5837716478008824 | 0.8794485159645139  | 0.3317656178999210 |
| 0.4162283521991175 | 0.1205514840354857  | 0.6682343821000719 |
| 0.4802387829760325 | 0.7467136388045678  | 0.2537559580573429 |
| 0.5197612170239678 | 0.2532863611954319  | 0.7462440419426569 |
| 0.6798881240598489 | 0.8013368037247999  | 0.4046351588086934 |
| 0.3201118759401514 | 0.1986631962752005  | 0.5953648411913068 |
| 0.7073529804180355 | 0.8073745876747485  | 0.2198101997405800 |
| 0.2926470195819645 | 0.1926254123252517  | 0.7801898002594199 |
| 0.5867030780130342 | 0.8486191659111619  | 0.2127792575976958 |
| 0.4132969219869667 | 0.1513808340888382  | 0.7872207424023044 |
| 0.5807789730365118 | 0.7004372200953549  | 0.2100128720442207 |
| 0.4192210269634882 | 0.2995627799046449  | 0.7899871279557792 |
| 0.7279503323617392 | 0.8872381152683783  | 0.3209430901785690 |
| 0.2720496676382613 | 0.1127618847316289  | 0.6790569098214307 |
| 0.7219540977089894 | 0.7387162368627431  | 0.3180958381241050 |
| 0.2780459022910104 | 0.2612837631372572  | 0.6819041618758951 |
| 0.7046648828854184 | 0.7374083984279874  | 0.6381608116398124 |
| 0.2953351171145819 | 0.2625916015720126  | 0.3618391883601876 |
| 0.6660371635193473 | 0.6454647254266411  | 0.5313250333291932 |
| 0.3339628364806523 | 0.3545352745733584  | 0.4686749666708074 |
| 0.7835263253232965 | 0.0115542053840542  | 0.5463806867733099 |
| 0.2164736746767030 | 0.9884457946159459  | 0.4536193132266904 |
| 0.6691957313872062 | 0.9138658388807819  | 0.5774661911341685 |
| 0.3308042686127942 | 0.0861341611192185  | 0.4225338088658315 |
| 0.7354766830968800 | 0.0408820142858122  | 0.7449218661868654 |
| 0.2645233169031198 | 0.9591179857141883  | 0.2550781338131350 |
| 0.8915859726237840 | 0.0887674494248547  | 0.8211715863177413 |
| 0.1084140273762165 | 0.9112325505751452  | 0.1788284136822582 |
| 0.7193090699376314 | 0.5028901940716448  | 0.6500282220449942 |
| 0.2806909300623686 | 0.4971098059283556  | 0.3499717779550058 |
| 0.8723498324700908 | 0.5234778504190989  | 0.7223932119613472 |
| 0.1276501675299092 | 0.4765221495809015  | 0.2776067880386529 |
| 0.9236141838506767 | 0.7300065684363688  | 0.6919085663354398 |
| 0.0763858161493236 | 0.2699934315636315  | 0.3080914336645601 |
| 0.8732698254839379 | 0.6306608130685554  | 0.5873805857762018 |
| 0.1267301745160623 | 0.3693391869314442  | 0.4126194142237989 |
| 0.9463467035917419 | 0.0009731915908381  | 0.7019901547525570 |
| 0.0536532964082581 | -0.0009731915908381 | 0.2980098452474430 |
| 0.8380753087965301 | 0.9000785598619611  | 0.7352460018617208 |
| 0.1619246912034698 | 0.0999214401380390  | 0.2647539981382799 |
| 0.7128827953058280 | 0.6493567124180586  | 0.7642517862616780 |
| 0.2871172046941717 | 0.3506432875819422  | 0.2357482137383222 |
| 0.8689940402229026 | 0.6744498889234045  | 0.8360783601200743 |

|                    |                    |                    |
|--------------------|--------------------|--------------------|
| 0.1310059597770977 | 0.3255501110765953 | 0.1639216398799328 |
| 0.7584444332620387 | 0.5420097046865067 | 0.8270735258886303 |
| 0.2415555667379611 | 0.4579902953134941 | 0.1729264741113700 |
| 0.7749893693908799 | 0.1615962775903171 | 0.6208675075616901 |
| 0.2250106306091201 | 0.8384037224096832 | 0.3791324924383105 |
| 0.9352196692574738 | 0.2013857802376703 | 0.6882998576904492 |
| 0.0647803307425266 | 0.7986142197623296 | 0.3117001423095508 |
| 0.8385140818858383 | 0.2450197208526639 | 0.7346299812415269 |
| 0.1614859181141619 | 0.7549802791473361 | 0.2653700187584729 |
| 0.9235797179127054 | 0.2785555804332563 | 0.1238383680238451 |
| 0.0764202820872946 | 0.7214444195667444 | 0.8761616319761549 |
| 0.8845110817651827 | 0.1686088368492549 | 0.1922785669472520 |
| 0.1154889182348168 | 0.8313911631507449 | 0.8077214330527477 |
| 0.6032581997904621 | 0.3619565036169963 | 0.0867829848935130 |
| 0.3967418002095379 | 0.6380434963830030 | 0.9132170151064871 |
| 0.6410291562029171 | 0.4132013234232357 | 0.2098552017937337 |
| 0.3589708437970829 | 0.5867986765767639 | 0.7901447982062666 |
| 0.6988419333003510 | 0.2589844241720103 | 0.0412308729457218 |
| 0.3011580666996492 | 0.7410155758279896 | 0.9587691270542852 |
| 0.6656599461265845 | 0.1526031300940242 | 0.1137446821030172 |
| 0.3343400538734157 | 0.8473968699059755 | 0.8862553178969830 |
| 0.9426305215743354 | 0.4791985047232932 | 0.5494420445264165 |
| 0.0573694784256647 | 0.5208014952767067 | 0.4505579554735827 |
| 0.9097690495236523 | 0.3727276607327305 | 0.6229996585143442 |
| 0.0902309504763485 | 0.6272723392672688 | 0.3770003414856563 |
| 0.7930327878658879 | 0.4230131211610638 | 0.5478792869827992 |
| 0.2069672121341119 | 0.5769868788389363 | 0.4521207130172009 |
| 0.9138043034028218 | 0.0201596543125258 | 0.9851667405259391 |
| 0.0861956965971780 | 0.9798403456874741 | 0.0148332594740607 |
| 0.9698097709843913 | 0.0468148395967580 | 0.1138559183931110 |
| 0.0301902290156079 | 0.9531851604032343 | 0.8861440816068892 |
| 0.0093274446497216 | 0.1567275961143801 | 0.0454971080609407 |
| 0.9906725553502781 | 0.8432724038856202 | 0.9545028919390591 |
| 0.7864821962649140 | 0.1455302788053579 | 0.9693920502689293 |
| 0.2135178037350859 | 0.8544697211946417 | 0.0306079497310705 |
| 0.7508281961243565 | 0.0381332603907995 | 0.0397026436178965 |
| 0.2491718038756441 | 0.9618667396092005 | 0.9602973563821043 |
| 0.9318170338047703 | 0.4111940249407099 | 0.2302002955480331 |
| 0.0681829661952293 | 0.5888059750592902 | 0.7697997044519665 |
| 0.8397173075135521 | 0.4883566321885313 | 0.2461543741179327 |
| 0.1602826924864480 | 0.5116433678114692 | 0.7538456258820669 |
| 0.8710454959076968 | 0.2652761813986808 | 0.3026139871585823 |
| 0.1289545040923027 | 0.7347238186013256 | 0.6973860128414175 |
| 0.7164264457357447 | 0.1896050955948450 | 0.2773280698468071 |

|                    |                    |                    |
|--------------------|--------------------|--------------------|
| 0.2835735542642555 | 0.8103949044051555 | 0.7226719301531935 |
| 0.3790493221177671 | 0.2786933347210553 | 0.0494377459992308 |
| 0.6209506778822398 | 0.7213066652789452 | 0.9505622540007700 |
| 0.4112481157062940 | 0.3442822044402721 | 0.1661691684049628 |
| 0.5887518842937060 | 0.6557177955597273 | 0.8338308315950372 |
| 0.9254620602234808 | 0.2929783732422059 | 0.4719879841558959 |
| 0.0745379397765192 | 0.7070216267577939 | 0.5280120158441044 |
| 0.7799200970959855 | 0.2317078842903832 | 0.4743953483504181 |
| 0.2200799029040147 | 0.7682921157096164 | 0.5256046516495819 |
| 0.2922117539960472 | 0.0883128286172015 | 0.0981689345743144 |
| 0.7077882460039530 | 0.9116871713827980 | 0.9018310654256858 |
| 0.2113688994883220 | 0.1818337092642902 | 0.1049352848374521 |
| 0.7886311005116786 | 0.8181662907357102 | 0.8950647151625482 |
| 0.3186429670894389 | 0.1566250121384182 | 0.2127091819938807 |
| 0.6813570329105615 | 0.8433749878615817 | 0.7872908180061197 |
| 0.8411552549671421 | 0.4376562352210998 | 0.3718621400802199 |
| 0.1588447450328576 | 0.5623437647788991 | 0.6281378599197807 |
| 0.6948792977961271 | 0.3530714845052523 | 0.3599837593432509 |
| 0.3051207022038731 | 0.6469285154947467 | 0.6400162406567488 |
| 0.5114769001798433 | 0.1633792177275096 | 0.1211801685524497 |
| 0.4885230998201570 | 0.8366207822724904 | 0.8788198314475498 |
| 0.5407324960185514 | 0.2204200670387563 | 0.2399660480708457 |
| 0.4592675039814491 | 0.7795799329612437 | 0.7600339519291542 |
| 0.0322165881358452 | 0.5644463029563531 | 0.1637093160868504 |
| 0.9677834118641547 | 0.4355536970436474 | 0.8362906839131492 |
| 0.9420807238783594 | 0.6433607562058624 | 0.1791108450420879 |
| 0.0579192761216405 | 0.3566392437941376 | 0.8208891549579125 |
| 0.8410630271961568 | 0.4167870344586735 | 0.0478181624518762 |
| 0.1589369728038428 | 0.5832129655413263 | 0.9521818375481236 |
| 0.7530995793957702 | 0.4961358903186545 | 0.0673804990622127 |
| 0.2469004206042298 | 0.5038641096813453 | 0.9326195009377871 |
| 0.9590050360591279 | 0.5841626258223704 | 0.9837008937418014 |
| 0.0409949639408725 | 0.4158373741776292 | 0.0162991062581983 |
| 0.0344667010234014 | 0.7166910525850007 | 0.0589698500399973 |
| 0.9655332989765992 | 0.2833089474149993 | 0.9410301499600026 |
| 0.8727353714467864 | 0.6666280092945235 | 0.0022315627413468 |
| 0.1272646285532141 | 0.3333719907054767 | 0.9977684372586463 |

# FREE ENERGIE OF THE ION-ELECTRON SYSTEM (eV)

Free energy TOTEN = -1057.08786787 eV

Energy without entropy = -1057.08786787 energy (sigma->0) = -1057.08786787

Optimized cell vectors and atomic coordinates of (*n*-Bu<sub>4</sub>N)[2-B<sub>10</sub>Br<sub>9</sub>S(*n*-C<sub>12</sub>H<sub>25</sub>)<sub>2</sub>]

|                     |                     |                     |
|---------------------|---------------------|---------------------|
| 17.2666633355104366 | 0.0000000000000000  | -3.7284588189224630 |
| 0.0000000000000000  | 12.4548964381314331 | 0.0000000000000000  |
| -0.2116359037036214 | 0.0000000000000000  | 25.9058749462344018 |

|    |   |   |     |    |     |
|----|---|---|-----|----|-----|
| Br | S | N | C   | B  | H   |
| 36 | 4 | 4 | 160 | 40 | 344 |

Direct

|                    |                    |                    |
|--------------------|--------------------|--------------------|
| 0.1408371657938038 | 0.2033514810998538 | 0.3154790936955978 |
| 0.8591628342061964 | 0.7033514810998536 | 0.1845209063044024 |
| 0.8591628342061964 | 0.7966485189001464 | 0.6845209063044025 |
| 0.1408371657938038 | 0.2966485189001461 | 0.8154790936955975 |
| 0.2658757653796970 | 0.1995230133375592 | 0.4573224237672904 |
| 0.7341242346203029 | 0.6995230133375595 | 0.0426775762327095 |
| 0.7341242346203029 | 0.8004769866624405 | 0.5426775762327096 |
| 0.2658757653796970 | 0.3004769866624408 | 0.9573224237672904 |
| 0.2966384820802436 | 0.9832573105363795 | 0.3281412125048763 |
| 0.7033615179197563 | 0.4832573105363725 | 0.1718587874951237 |
| 0.7033615179197563 | 0.0167426894636274 | 0.6718587874951234 |
| 0.2966384820802436 | 0.5167426894636205 | 0.8281412125048766 |
| 0.2823991171305624 | 0.2579675123446870 | 0.2208110552890851 |
| 0.7176008828694448 | 0.7579675123446871 | 0.2791889447109150 |
| 0.7176008828694448 | 0.7420324876553129 | 0.7791889447109149 |
| 0.2823991171305624 | 0.2420324876553131 | 0.7208110552890851 |
| 0.4147338213451705 | 0.4207765783572042 | 0.4590614795682916 |
| 0.5852661786548294 | 0.9207765783572039 | 0.0409385204317084 |
| 0.5852661786548294 | 0.5792234216427961 | 0.5409385204317083 |
| 0.4147338213451705 | 0.0792234216427961 | 0.9590614795682917 |
| 0.4503446518569367 | 0.0650027651631606 | 0.4486044351219388 |
| 0.5496553481430702 | 0.5650027651631605 | 0.0513955648780612 |
| 0.5496553481430702 | 0.9349972348368395 | 0.5513955648780684 |
| 0.4503446518569367 | 0.4349972348368393 | 0.9486044351219316 |
| 0.4667760971804608 | 0.1010660564230090 | 0.2831687582553656 |
| 0.5332239028195391 | 0.6010660564230088 | 0.2168312417446344 |
| 0.5332239028195391 | 0.8989339435769912 | 0.7168312417446340 |
| 0.4667760971804608 | 0.3989339435769909 | 0.7831687582553660 |
| 0.4257841274505208 | 0.4541398610378257 | 0.2916554607125855 |

|                    |                    |                    |
|--------------------|--------------------|--------------------|
| 0.5742158725494795 | 0.9541398610378256 | 0.2083445392874144 |
| 0.5742158725494795 | 0.5458601389621744 | 0.7083445392874146 |
| 0.4257841274505208 | 0.0458601389621743 | 0.7916554607125854 |
| 0.5747909727559580 | 0.2855884492085042 | 0.3975017444011643 |
| 0.4252090272440420 | 0.7855884492085042 | 0.1024982555988357 |
| 0.4252090272440420 | 0.7144115507914958 | 0.6024982555988282 |
| 0.5747909727559580 | 0.2144115507914957 | 0.8975017444011718 |
| 0.2621239726539080 | 0.4737245146996907 | 0.3515632435356917 |
| 0.7378760273460920 | 0.9737245146996910 | 0.1484367564643083 |
| 0.7378760273460920 | 0.5262754853003090 | 0.6484367564643082 |
| 0.2621239726539080 | 0.0262754853003021 | 0.8515632435356918 |
| 0.4723961607288269 | 0.2434723544207627 | 0.6222604679284863 |
| 0.5276038392711728 | 0.7434723544207629 | 0.8777395320715137 |
| 0.5276038392711728 | 0.7565276455792371 | 0.3777395320715137 |
| 0.4723961607288269 | 0.2565276455792372 | 0.1222604679284863 |
| 0.1868320041846629 | 0.4525912337747238 | 0.3894120193729992 |
| 0.8131679958153373 | 0.9525912337747235 | 0.1105879806270007 |
| 0.8131679958153373 | 0.5474087662252765 | 0.6105879806270007 |
| 0.1868320041846629 | 0.0474087662252762 | 0.8894120193729993 |
| 0.1817316315677467 | 0.5486949884335716 | 0.4244291356168009 |
| 0.8182683684322534 | 0.0486949884335714 | 0.0755708643831991 |
| 0.8182683684322534 | 0.4513050115664357 | 0.5755708643831990 |
| 0.1817316315677467 | 0.9513050115664284 | 0.9244291356168010 |
| 0.1199601744047655 | 0.5336682366130433 | 0.4568716638873737 |
| 0.8800398255952345 | 0.0336682366130437 | 0.0431283361126263 |
| 0.8800398255952345 | 0.4663317633869563 | 0.5431283361126262 |
| 0.1199601744047655 | 0.9663317633869567 | 0.9568716638873738 |
| 0.1116070247592189 | 0.6351876367054240 | 0.4880732765784809 |
| 0.8883929752407813 | 0.1351876367054312 | 0.0119267234215190 |
| 0.8883929752407813 | 0.3648123632945688 | 0.5119267234215188 |
| 0.1116070247592189 | 0.8648123632945760 | 0.9880732765784812 |
| 0.0526839673932281 | 0.6266985157230407 | 0.5229940250756637 |
| 0.9473160326067720 | 0.1266985157230409 | 0.9770059749243363 |
| 0.9473160326067720 | 0.3733014842769591 | 0.4770059749243364 |
| 0.0526839673932281 | 0.8733014842769593 | 0.0229940250756635 |
| 0.0524408407081267 | 0.7248419918595307 | 0.5584461099775746 |
| 0.9475591592918734 | 0.2248419918595308 | 0.9415538900224254 |
| 0.9475591592918734 | 0.2751580081404691 | 0.4415538900224252 |
| 0.0524408407081267 | 0.7751580081404693 | 0.0584461099775748 |
| 0.0482823160565138 | 0.8323493193699458 | 0.5294827443662059 |
| 0.9517176839434792 | 0.3323493193699461 | 0.9705172556337941 |
| 0.9517176839434792 | 0.1676506806300540 | 0.4705172556337942 |
| 0.0482823160565138 | 0.6676506806300542 | 0.0294827443662059 |
| 0.0364892141931273 | 0.9281269751716181 | 0.5636862811721051 |

|                    |                    |                    |
|--------------------|--------------------|--------------------|
| 0.9635107858068728 | 0.4281269751716182 | 0.9363137188278949 |
| 0.9635107858068728 | 0.0718730248283818 | 0.4363137188278950 |
| 0.0364892141931273 | 0.5718730248283819 | 0.0636862811721050 |
| 0.9532797551836818 | 0.9430988269757060 | 0.5702601311525113 |
| 0.0467202448163187 | 0.4430988269757061 | 0.9297398688474887 |
| 0.0467202448163187 | 0.0569011730242939 | 0.4297398688474888 |
| 0.9532797551836818 | 0.5569011730242940 | 0.0702601311525113 |
| 0.9457334167773752 | 0.0353356913649098 | 0.6075951876462060 |
| 0.0542665832226247 | 0.5353356913649100 | 0.8924048123537940 |
| 0.0542665832226247 | 0.9646643086350900 | 0.3924048123537939 |
| 0.9457334167773752 | 0.4646643086350902 | 0.1075951876462061 |
| 0.8630847495142532 | 0.0755902671435048 | 0.6025021276444776 |
| 0.1369152504857467 | 0.5755902671435047 | 0.8974978723555224 |
| 0.1369152504857467 | 0.9244097328564953 | 0.3974978723555225 |
| 0.8630847495142532 | 0.4244097328564952 | 0.1025021276444775 |
| 0.8582621053011387 | 0.1666561894339023 | 0.6409134160611711 |
| 0.1417378946988616 | 0.6666561894339020 | 0.8590865839388289 |
| 0.1417378946988616 | 0.8333438105660980 | 0.3590865839388289 |
| 0.8582621053011387 | 0.3333438105661050 | 0.1409134160611712 |
| 0.2068747291548226 | 0.4831908893920359 | 0.2837428319575319 |
| 0.7931252708451773 | 0.9831908893920357 | 0.2162571680424680 |
| 0.7931252708451773 | 0.5168091106079643 | 0.7162571680424681 |
| 0.2068747291548226 | 0.0168091106079642 | 0.7837428319575319 |
| 0.1608357569700302 | 0.5865965534272800 | 0.2741210673879467 |
| 0.8391642430299698 | 0.0865965534272729 | 0.2258789326120535 |
| 0.8391642430299698 | 0.4134034465727270 | 0.7258789326120534 |
| 0.1608357569700302 | 0.9134034465727200 | 0.7741210673879466 |
| 0.1139910786227650 | 0.5893202762143114 | 0.2170466008019205 |
| 0.8860089213772349 | 0.0893202762143112 | 0.2829533991980724 |
| 0.8860089213772349 | 0.4106797237856888 | 0.7829533991980797 |
| 0.1139910786227650 | 0.9106797237856886 | 0.7170466008019203 |
| 0.0614655008230179 | 0.6874644441225524 | 0.2050788050269171 |
| 0.9385344991769818 | 0.1874644441225528 | 0.2949211949730829 |
| 0.9385344991769818 | 0.3125355558774400 | 0.7949211949730827 |
| 0.0614655008230179 | 0.8125355558774476 | 0.7050788050269173 |
| 0.1040883390644919 | 0.7937461044759344 | 0.2054491097523427 |
| 0.8959116609355080 | 0.2937461044759345 | 0.2945508902476571 |
| 0.8959116609355080 | 0.2062538955240655 | 0.7945508902476572 |
| 0.1040883390644919 | 0.7062538955240656 | 0.7054491097523428 |
| 0.0493005427370617 | 0.8896651277522956 | 0.1965924894474441 |
| 0.9506994572629383 | 0.3896651277523028 | 0.3034075105525558 |
| 0.9506994572629383 | 0.1103348722477043 | 0.8034075105525558 |
| 0.0493005427370617 | 0.6103348722477044 | 0.6965924894474442 |
| 0.0898809710641069 | 0.9938884504490465 | 0.1880642867905387 |

|                    |                    |                    |
|--------------------|--------------------|--------------------|
| 0.9101190289358931 | 0.4938884504490464 | 0.3119357132094614 |
| 0.9101190289358931 | 0.0061115495509536 | 0.8119357132094612 |
| 0.0898809710641069 | 0.5061115495509535 | 0.6880642867905388 |
| 0.0347276768283673 | 0.0895233292065084 | 0.1788888260269293 |
| 0.9652723231716327 | 0.5895233292065085 | 0.3211111739730708 |
| 0.9652723231716327 | 0.9104766707934915 | 0.8211111739730705 |
| 0.0347276768283673 | 0.4104766707934915 | 0.6788888260269295 |
| 0.0711039714952538 | 0.1937688513179474 | 0.1650774566399837 |
| 0.9288960285047461 | 0.6937688513179472 | 0.3349225433600163 |
| 0.9288960285047461 | 0.8062311486820528 | 0.8349225433600165 |
| 0.0711039714952538 | 0.3062311486820527 | 0.6650774566399835 |
| 0.1026200196426881 | 0.1846839123122433 | 0.1149619608324841 |
| 0.8973799803573120 | 0.6846839123122433 | 0.3850380391675158 |
| 0.8973799803573120 | 0.8153160876877567 | 0.8850380391675158 |
| 0.1026200196426881 | 0.3153160876877567 | 0.6149619608324842 |
| 0.1311800655238286 | 0.2905710922167464 | 0.0969431063394126 |
| 0.8688199344761713 | 0.7905710922167462 | 0.4030568936605873 |
| 0.8688199344761713 | 0.7094289077832538 | 0.9030568936605804 |
| 0.1311800655238286 | 0.2094289077832537 | 0.5969431063394196 |
| 0.1625809736709849 | 0.2783907044963153 | 0.0471292130068604 |
| 0.8374190263290152 | 0.7783907044963151 | 0.4528707869931395 |
| 0.8374190263290152 | 0.7216092955036849 | 0.9528707869931398 |
| 0.1625809736709849 | 0.2216092955036847 | 0.5471292130068602 |
| 0.4245275592853061 | 0.3294127136725853 | 0.6415755412586419 |
| 0.5754724407146942 | 0.8294127136725852 | 0.8584244587413581 |
| 0.5754724407146942 | 0.6705872863274148 | 0.3584244587413576 |
| 0.4245275592853061 | 0.1705872863274148 | 0.1415755412586422 |
| 0.3701405256370151 | 0.3942986359472307 | 0.5995570827116476 |
| 0.6298594743629845 | 0.8942986359472307 | 0.9004429172883524 |
| 0.6298594743629845 | 0.6057013640527693 | 0.4004429172883526 |
| 0.3701405256370151 | 0.1057013640527694 | 0.0995570827116474 |
| 0.3206601751129426 | 0.4677787978023801 | 0.6263227403588343 |
| 0.6793398248870570 | 0.9677787978023803 | 0.8736772596411657 |
| 0.6793398248870570 | 0.5322212021976197 | 0.3736772596411728 |
| 0.3206601751129426 | 0.0322212021976198 | 0.1263227403588342 |
| 0.2613885478046503 | 0.5309809218037893 | 0.5862447663299029 |
| 0.7386114521953571 | 0.0309809218037894 | 0.9137552336700971 |
| 0.7386114521953571 | 0.4690190781962106 | 0.4137552336700971 |
| 0.2613885478046503 | 0.9690190781962107 | 0.0862447663299029 |
| 0.5259583913711288 | 0.2967182583999677 | 0.5914706414410411 |
| 0.4740416086288711 | 0.7967182583999676 | 0.9085293585589589 |
| 0.4740416086288711 | 0.7032817416000324 | 0.4085293585589588 |
| 0.5259583913711288 | 0.2032817416000325 | 0.0914706414410412 |
| 0.5767836324883101 | 0.2193180987457726 | 0.5691478479667593 |



|                    |                    |                    |
|--------------------|--------------------|--------------------|
| 0.4232163675116902 | 0.7193180987457727 | 0.9308521520332407 |
| 0.4232163675116902 | 0.7806819012542273 | 0.4308521520332406 |
| 0.5767836324883101 | 0.2806819012542273 | 0.0691478479667594 |
| 0.6435712018237448 | 0.2767625094084130 | 0.5520156957682356 |
| 0.3564287981762623 | 0.7767625094084131 | 0.9479843042317644 |
| 0.3564287981762623 | 0.7232374905915869 | 0.4479843042317643 |
| 0.6435712018237448 | 0.2232374905915870 | 0.0520156957682357 |
| 0.6910759229822735 | 0.1979394194092738 | 0.5271242328818011 |
| 0.3089240770177338 | 0.6979394194092740 | 0.9728757671181989 |
| 0.3089240770177338 | 0.8020605805907260 | 0.4728757671182056 |
| 0.6910759229822735 | 0.3020605805907261 | 0.0271242328817944 |
| 0.5183487811161943 | 0.1839747640851233 | 0.6705850168490232 |
| 0.4816512188838054 | 0.6839747640851235 | 0.8294149831509768 |
| 0.4816512188838054 | 0.8160252359148765 | 0.3294149831509768 |
| 0.5183487811161943 | 0.3160252359148767 | 0.1705850168490232 |
| 0.5876055970399163 | 0.2436878979638448 | 0.7026956090108379 |
| 0.4123944029600838 | 0.7436878979638448 | 0.7973043909891621 |
| 0.4123944029600838 | 0.7563121020361552 | 0.2973043909891620 |
| 0.5876055970399163 | 0.2563121020361552 | 0.2026956090108380 |
| 0.6149980424775864 | 0.1917445337131594 | 0.7570282977766575 |
| 0.3850019575224137 | 0.6917445337131594 | 0.7429717022233425 |
| 0.3850019575224137 | 0.8082554662868406 | 0.2429717022233424 |
| 0.6149980424775864 | 0.3082554662868406 | 0.2570282977766575 |
| 0.6857749576779135 | 0.2494563565265981 | 0.7889956993692073 |
| 0.3142250423220864 | 0.7494563565265981 | 0.7110043006307927 |
| 0.3142250423220864 | 0.7505436434734019 | 0.2110043006307998 |
| 0.6857749576779135 | 0.2505436434733946 | 0.2889956993692073 |
| 0.4214321513120175 | 0.1624279058739986 | 0.5869436599364404 |
| 0.5785678486879826 | 0.6624279058739985 | 0.9130563400635596 |
| 0.5785678486879826 | 0.8375720941260015 | 0.4130563400635595 |
| 0.4214321513120175 | 0.3375720941260015 | 0.0869436599364403 |
| 0.3589606789674745 | 0.1097401295832466 | 0.6104700904038297 |
| 0.6410393210325258 | 0.6097401295832470 | 0.8895299095961703 |
| 0.6410393210325258 | 0.8902598704167530 | 0.3895299095961705 |
| 0.3589606789674745 | 0.3902598704167534 | 0.1104700904038296 |
| 0.3281104084145021 | 0.0095577645560047 | 0.5783843371621682 |
| 0.6718895915854977 | 0.5095577645560044 | 0.9216156628378318 |
| 0.6718895915854977 | 0.9904422354439956 | 0.4216156628378316 |
| 0.3281104084145021 | 0.4904422354439953 | 0.0783843371621684 |
| 0.2622544135175072 | 0.9553733196782941 | 0.5979670343469091 |
| 0.7377455864824927 | 0.4553733196782939 | 0.9020329656530909 |
| 0.7377455864824927 | 0.0446266803217061 | 0.4020329656530904 |
| 0.2622544135175072 | 0.5446266803217059 | 0.0979670343469094 |
| 0.2520581808461683 | 0.2248912174655256 | 0.3350297037424834 |

|                    |                    |                    |
|--------------------|--------------------|--------------------|
| 0.7479418191538315 | 0.7248912174655255 | 0.1649702962575167 |
| 0.7479418191538315 | 0.7751087825344745 | 0.6649702962575167 |
| 0.2520581808461683 | 0.2751087825344746 | 0.8350297037424833 |
| 0.3057286387537059 | 0.3362478153253785 | 0.3508304191259711 |
| 0.6942713612462940 | 0.8362478153253787 | 0.1491695808740290 |
| 0.6942713612462940 | 0.6637521846746213 | 0.6491695808740291 |
| 0.3057286387537059 | 0.1637521846746214 | 0.8508304191259709 |
| 0.3113498523814712 | 0.2234620906718508 | 0.3960007385806197 |
| 0.6886501476185287 | 0.7234620906718511 | 0.1039992614193732 |
| 0.6886501476185287 | 0.7765379093281489 | 0.6039992614193803 |
| 0.3113498523814712 | 0.2765379093281491 | 0.8960007385806197 |
| 0.3245459597271100 | 0.1335715329294562 | 0.3427991383062118 |
| 0.6754540402728899 | 0.6335715329294561 | 0.1572008616937881 |
| 0.6754540402728899 | 0.8664284670705439 | 0.6572008616937879 |
| 0.3245459597271100 | 0.3664284670705438 | 0.8427991383062121 |
| 0.3180912684723714 | 0.2469432946718025 | 0.2975947464259003 |
| 0.6819087315276287 | 0.7469432946718023 | 0.2024052535740997 |
| 0.6819087315276287 | 0.7530567053281977 | 0.7024052535740999 |
| 0.3180912684723714 | 0.2530567053281975 | 0.7975947464259001 |
| 0.3923951396207336 | 0.3163155430955585 | 0.4009101867970866 |
| 0.6076048603792663 | 0.8163155430955584 | 0.0990898132029134 |
| 0.6076048603792663 | 0.6836844569044416 | 0.5990898132029133 |
| 0.3923951396207336 | 0.1836844569044414 | 0.9009101867970867 |
| 0.4064845466654934 | 0.1717876333070599 | 0.3956571279330788 |
| 0.5935154533345065 | 0.6717876333070668 | 0.1043428720669141 |
| 0.5935154533345065 | 0.8282123666929332 | 0.6043428720669143 |
| 0.4064845466654934 | 0.3282123666929401 | 0.8956571279330857 |
| 0.4119560509232778 | 0.1871593753643363 | 0.3264367189715916 |
| 0.5880439490767223 | 0.6871593753643365 | 0.1735632810284083 |
| 0.5880439490767223 | 0.8128406246356635 | 0.6735632810284083 |
| 0.4119560509232778 | 0.3128406246356637 | 0.8264367189715917 |
| 0.3972991175169587 | 0.3315613025978753 | 0.3311072571860696 |
| 0.6027008824830413 | 0.8315613025978752 | 0.1688927428139304 |
| 0.6027008824830413 | 0.6684386974021248 | 0.6688927428139235 |
| 0.3972991175169587 | 0.1684386974021246 | 0.8311072571860765 |
| 0.4642999994446995 | 0.2638133755174035 | 0.3755641633346579 |
| 0.5357000005553006 | 0.7638133755174034 | 0.1244358366653421 |
| 0.5357000005553006 | 0.7361866244825966 | 0.6244358366653419 |
| 0.4642999994446995 | 0.2361866244825966 | 0.8755641633346581 |
| 0.1326378538544179 | 0.4363747788188999 | 0.3604717029169723 |
| 0.8673621461455820 | 0.9363747788189002 | 0.1395282970830277 |
| 0.8673621461455820 | 0.5636252211810998 | 0.6395282970830276 |
| 0.1326378538544179 | 0.0636252211811000 | 0.8604717029169724 |
| 0.2033444157732504 | 0.3792476066309739 | 0.4126593133393169 |

|                    |                    |                    |
|--------------------|--------------------|--------------------|
| 0.7966555842267496 | 0.8792476066309741 | 0.0873406866606831 |
| 0.7966555842267496 | 0.6207523933690259 | 0.5873406866606833 |
| 0.2033444157732504 | 0.1207523933690259 | 0.9126593133393167 |
| 0.1690258794087472 | 0.6218087089342840 | 0.4002218742611217 |
| 0.8309741205912526 | 0.1218087089342842 | 0.0997781257388783 |
| 0.8309741205912526 | 0.3781912910657159 | 0.5997781257388854 |
| 0.1690258794087472 | 0.8781912910657160 | 0.9002218742611146 |
| 0.2385185373298783 | 0.5617094056822195 | 0.4512845170428373 |
| 0.7614814626701144 | 0.0617094056822196 | 0.0487154829571627 |
| 0.7614814626701144 | 0.4382905943177803 | 0.5487154829571627 |
| 0.2385185373298783 | 0.9382905943177805 | 0.9512845170428373 |
| 0.0637816989267597 | 0.5133626835909930 | 0.4306517331307043 |
| 0.9362183010732403 | 0.0133626835909930 | 0.0693482668692955 |
| 0.9362183010732403 | 0.4866373164090069 | 0.5693482668692953 |
| 0.0637816989267597 | 0.9866373164090070 | 0.9306517331307047 |
| 0.1353325565855692 | 0.4646913552600924 | 0.4837828948687448 |
| 0.8646674434144307 | 0.9646913552600925 | 0.0162171051312551 |
| 0.8646674434144307 | 0.5353086447399075 | 0.5162171051312550 |
| 0.1353325565855692 | 0.0353086447399075 | 0.9837828948687450 |
| 0.0955391748977151 | 0.7019908024405475 | 0.4599151302913429 |
| 0.9044608251022849 | 0.2019908024405472 | 0.0400848697086571 |
| 0.9044608251022849 | 0.2980091975594528 | 0.5400848697086570 |
| 0.0955391748977151 | 0.7980091975594525 | 0.9599151302913430 |
| 0.1686723739295760 | 0.6567048712390248 | 0.5127765015904399 |
| 0.8313276260704240 | 0.1567048712390249 | 0.9872234984095601 |
| 0.8313276260704240 | 0.3432951287609751 | 0.4872234984095528 |
| 0.1686723739295760 | 0.8432951287609752 | 0.0127765015904401 |
| 0.0646542807080266 | 0.5541313722818846 | 0.5478109912020879 |
| 0.9353457192919734 | 0.0541313722818845 | 0.9521890087979121 |
| 0.9353457192919734 | 0.4458686277181154 | 0.4521890087979127 |
| 0.0646542807080266 | 0.9458686277181154 | 0.0478109912020876 |
| 0.9943488021440268 | 0.6152055645452496 | 0.4977902070356190 |
| 0.0056511978559733 | 0.1152055645452424 | 0.0022097929643812 |
| 0.0056511978559733 | 0.3847944354547576 | 0.5022097929643814 |
| 0.9943488021440268 | 0.8847944354547504 | 0.9977902070356186 |
| 0.0036951062404295 | 0.7180658198685053 | 0.5785081511997793 |
| 0.9963048937595705 | 0.2180658198685055 | 0.9214918488002207 |
| 0.9963048937595705 | 0.2819341801314945 | 0.4214918488002208 |
| 0.0036951062404295 | 0.7819341801314947 | 0.0785081511997792 |
| 0.1056143256446329 | 0.7244153353473001 | 0.5900730028192954 |
| 0.8943856743553672 | 0.2244153353473000 | 0.9099269971807046 |
| 0.8943856743553672 | 0.2755846646526999 | 0.4099269971807044 |
| 0.1056143256446329 | 0.7755846646526999 | 0.0900730028192955 |
| 0.0011847043311528 | 0.8304244855394928 | 0.4936491448219327 |

|                    |                    |                    |
|--------------------|--------------------|--------------------|
| 0.9988152956688469 | 0.3304244855394930 | 0.0063508551780601 |
| 0.9988152956688469 | 0.1695755144605070 | 0.5063508551780601 |
| 0.0011847043311528 | 0.6695755144605072 | 0.9936491448219399 |
| 0.1021637300205873 | 0.8441243124263792 | 0.5154481291012685 |
| 0.8978362699794129 | 0.3441243124263864 | 0.9845518708987315 |
| 0.8978362699794129 | 0.1558756875736136 | 0.4845518708987313 |
| 0.1021637300205873 | 0.6558756875736208 | 0.0154481291012687 |
| 0.0761984601863641 | 0.9209310942826816 | 0.6028241905653632 |
| 0.9238015398136359 | 0.4209310942826814 | 0.8971758094346368 |
| 0.9238015398136359 | 0.0790689057173185 | 0.3971758094346365 |
| 0.0761984601863641 | 0.5790689057173184 | 0.1028241905653704 |
| 0.0541031320177216 | 0.0020064988882145 | 0.5461664285695945 |
| 0.9458968679822785 | 0.5020064988882144 | 0.9538335714304055 |
| 0.9458968679822785 | 0.9979935011117856 | 0.4538335714304056 |
| 0.0541031320177216 | 0.4979935011117854 | 0.0461664285695944 |
| 0.9305077211527276 | 0.8687884106647525 | 0.5842904454317317 |
| 0.0694922788472726 | 0.3687884106647522 | 0.9157095545682683 |
| 0.0694922788472726 | 0.1312115893352477 | 0.4157095545682685 |
| 0.9305077211527276 | 0.6312115893352475 | 0.0842904454317315 |
| 0.9157027350970099 | 0.9593228798606701 | 0.5310922825389701 |
| 0.0842972649029903 | 0.4593228798606703 | 0.9689077174610299 |
| 0.0842972649029903 | 0.0406771201393297 | 0.4689077174610231 |
| 0.9157027350970099 | 0.5406771201393299 | 0.0310922825389770 |
| 0.9699632446092293 | 0.0109736438428838 | 0.6488504497825228 |
| 0.0300367553907708 | 0.5109736438428837 | 0.8511495502174772 |
| 0.0300367553907708 | 0.9890263561571163 | 0.3511495502174772 |
| 0.9699632446092293 | 0.4890263561571162 | 0.1488504497825300 |
| 0.9817914361762222 | 0.1030564058460796 | 0.5997699709880366 |
| 0.0182085638237778 | 0.6030564058460868 | 0.9002300290119634 |
| 0.0182085638237778 | 0.8969435941539132 | 0.4002300290119634 |
| 0.9817914361762222 | 0.3969435941539204 | 0.0997699709880367 |
| 0.8252804832824834 | 0.0090478586750248 | 0.6090019297392784 |
| 0.1747195167175167 | 0.5090478586750176 | 0.8909980702607216 |
| 0.1747195167175167 | 0.9909521413249753 | 0.3909980702607218 |
| 0.8252804832824834 | 0.4909521413249752 | 0.1090019297392783 |
| 0.8407412795688319 | 0.1027500778369995 | 0.5615289576596095 |
| 0.1592587204311679 | 0.6027500778369994 | 0.9384710423403905 |
| 0.1592587204311679 | 0.8972499221630006 | 0.4384710423403907 |
| 0.8407412795688319 | 0.3972499221630006 | 0.0615289576596093 |
| 0.8962108019235180 | 0.2338849245508866 | 0.6355264945149478 |
| 0.1037891980764820 | 0.7338849245508871 | 0.8644735054850522 |
| 0.1037891980764820 | 0.7661150754491129 | 0.3644735054850521 |
| 0.8962108019235180 | 0.2661150754491134 | 0.1355264945149480 |
| 0.8769670649745464 | 0.1392566461411382 | 0.6820685969129842 |

|                    |                    |                    |
|--------------------|--------------------|--------------------|
| 0.1230329350254536 | 0.6392566461411381 | 0.8179314030870158 |
| 0.1230329350254536 | 0.8607433538588619 | 0.3179314030870160 |
| 0.8769670649745464 | 0.3607433538588617 | 0.1820685969129840 |
| 0.7989097516060916 | 0.1978747063667721 | 0.6358169584376473 |
| 0.2010902483939012 | 0.6978747063667721 | 0.8641830415623527 |
| 0.2010902483939012 | 0.8021252936332279 | 0.3641830415623528 |
| 0.7989097516060916 | 0.3021252936332279 | 0.1358169584376472 |
| 0.2512046859543481 | 0.4785568359783252 | 0.2599439128362653 |
| 0.7487953140456518 | 0.9785568359783253 | 0.2400560871637348 |
| 0.7487953140456518 | 0.5214431640216747 | 0.7400560871637347 |
| 0.2512046859543481 | 0.0214431640216747 | 0.7599439128362653 |
| 0.1701668817440146 | 0.4112675007930858 | 0.2757994990221104 |
| 0.8298331182559926 | 0.9112675007930787 | 0.2242005009778896 |
| 0.8298331182559926 | 0.5887324992069213 | 0.7242005009778897 |
| 0.1701668817440146 | 0.0887324992069142 | 0.7757994990221103 |
| 0.2002927755083967 | 0.6557841572555465 | 0.2824635612873850 |
| 0.7997072244916035 | 0.1557841572555467 | 0.2175364387126220 |
| 0.7997072244916035 | 0.3442158427444534 | 0.7175364387126221 |
| 0.2002927755083967 | 0.8442158427444535 | 0.7824635612873779 |
| 0.1208736482981477 | 0.5926611599558926 | 0.3011594418656037 |
| 0.8791263517018523 | 0.0926611599558923 | 0.1988405581343964 |
| 0.8791263517018523 | 0.4073388400441078 | 0.6988405581343963 |
| 0.1208736482981477 | 0.9073388400441074 | 0.8011594418656037 |
| 0.1538970118489832 | 0.5862769988064683 | 0.1897449704585556 |
| 0.8461029881510168 | 0.0862769988064683 | 0.3102550295414445 |
| 0.8461029881510168 | 0.4137230011935316 | 0.8102550295414442 |
| 0.1538970118489832 | 0.9137230011935317 | 0.6897449704585558 |
| 0.0786152595146312 | 0.5157446638421052 | 0.2095580624763571 |
| 0.9213847404853688 | 0.0157446638421051 | 0.2904419375236429 |
| 0.9213847404853688 | 0.4842553361578949 | 0.7904419375236429 |
| 0.0786152595146312 | 0.9842553361578948 | 0.7095580624763571 |
| 0.0219103720951838 | 0.6770799056148968 | 0.1662067419008600 |
| 0.9780896279048162 | 0.1770799056149040 | 0.3337932580991400 |
| 0.9780896279048162 | 0.3229200943850961 | 0.8337932580991403 |
| 0.0219103720951838 | 0.8229200943851032 | 0.6662067419008597 |
| 0.0241951137695856 | 0.6916695183718524 | 0.2340013843316418 |
| 0.9758048862304144 | 0.1916695183718524 | 0.2659986156683511 |
| 0.9758048862304144 | 0.3083304816281477 | 0.7659986156683581 |
| 0.0241951137695856 | 0.8083304816281476 | 0.7340013843316419 |
| 0.1465331380628528 | 0.8048418756839234 | 0.2431155474169696 |
| 0.8534668619371470 | 0.3048418756839232 | 0.2568844525830305 |
| 0.8534668619371470 | 0.1951581243160767 | 0.7568844525830303 |
| 0.1465331380628528 | 0.6951581243160766 | 0.7431155474169697 |
| 0.1381086153151130 | 0.7924428198233843 | 0.1745125191905542 |

|                    |                    |                    |
|--------------------|--------------------|--------------------|
| 0.8618913846848868 | 0.2924428198233842 | 0.3254874808094459 |
| 0.8618913846848868 | 0.2075571801766157 | 0.8254874808094458 |
| 0.1381086153151130 | 0.7075571801766157 | 0.6745125191905542 |
| 0.0210737289187932 | 0.8977599234559126 | 0.2304722181688587 |
| 0.9789262710812067 | 0.3977599234559127 | 0.2695277818311412 |
| 0.9789262710812067 | 0.1022400765440874 | 0.7695277818311409 |
| 0.0210737289187932 | 0.6022400765440874 | 0.7304722181688591 |
| 0.0019543379636975 | 0.8738979664810472 | 0.1617989998534452 |
| 0.9980456620363025 | 0.3738979664810471 | 0.3382010001465621 |
| 0.9980456620363025 | 0.1261020335189529 | 0.8382010001465550 |
| 0.0019543379636975 | 0.6261020335189528 | 0.6617989998534450 |
| 0.1378818504426222 | 0.0103033508301106 | 0.2222707143429160 |
| 0.8621181495573779 | 0.5103033508301106 | 0.2777292856570839 |
| 0.8621181495573779 | 0.9896966491698894 | 0.7777292856570839 |
| 0.1378818504426222 | 0.4896966491698895 | 0.7222707143429161 |
| 0.1168276915733533 | 0.9829886344685822 | 0.1538829988980622 |
| 0.8831723084266397 | 0.4829886344685823 | 0.3461170011019379 |
| 0.8831723084266397 | 0.0170113655314177 | 0.8461170011019380 |
| 0.1168276915733533 | 0.5170113655314178 | 0.6538829988980620 |
| 0.9843102903703421 | 0.0696828556669039 | 0.1468141937877902 |
| 0.0156897096296579 | 0.5696828556669041 | 0.3531858062122097 |
| 0.0156897096296579 | 0.9303171443330959 | 0.8531858062122096 |
| 0.9843102903703421 | 0.4303171443330962 | 0.6468141937877904 |
| 0.0117130887835829 | 0.1013029730931463 | 0.2146575831008344 |
| 0.9882869112164173 | 0.6013029730931461 | 0.2853424168991656 |
| 0.9882869112164173 | 0.8986970269068539 | 0.7853424168991657 |
| 0.0117130887835829 | 0.3986970269068538 | 0.7146575831008343 |
| 0.1181859906431960 | 0.2177753646710064 | 0.1983472540852971 |
| 0.8818140093568041 | 0.7177753646709992 | 0.3016527459147030 |
| 0.8818140093568041 | 0.7822246353290008 | 0.8016527459147028 |
| 0.1181859906431960 | 0.2822246353289937 | 0.6983472540852972 |
| 0.0276711181720560 | 0.2585828461369559 | 0.1601480686868555 |
| 0.9723288818279439 | 0.7585828461369561 | 0.3398519313131444 |
| 0.9723288818279439 | 0.7414171538630439 | 0.8398519313131373 |
| 0.0276711181720560 | 0.2414171538630440 | 0.6601480686868627 |
| 0.1505744843593120 | 0.1262744543164701 | 0.1210651846824053 |
| 0.8494255156406879 | 0.6262744543164703 | 0.3789348153175948 |
| 0.8494255156406879 | 0.8737255456835297 | 0.8789348153175948 |
| 0.1505744843593120 | 0.3737255456835298 | 0.6210651846824052 |
| 0.0570996766457199 | 0.1516676607607421 | 0.0826910918898435 |
| 0.9429003233542799 | 0.6516676607607421 | 0.4173089081101566 |
| 0.9429003233542799 | 0.8483323392392579 | 0.9173089081101565 |
| 0.0570996766457199 | 0.3483323392392580 | 0.5826910918898435 |
| 0.1760666501527041 | 0.3246672213932963 | 0.1291224646246229 |

|                    |                    |                    |
|--------------------|--------------------|--------------------|
| 0.8239333498472958 | 0.8246672213932966 | 0.3708775353753772 |
| 0.8239333498472958 | 0.6753327786067034 | 0.8708775353753769 |
| 0.1760666501527041 | 0.1753327786067037 | 0.6291224646246231 |
| 0.0835629758826887 | 0.3493125584140198 | 0.0900897113492412 |
| 0.9164370241173118 | 0.8493125584140195 | 0.4099102886507588 |
| 0.9164370241173118 | 0.6506874415859805 | 0.9099102886507586 |
| 0.0835629758826887 | 0.1506874415859803 | 0.5900897113492414 |
| 0.1186418886570628 | 0.2450405303301351 | 0.0143086736375821 |
| 0.8813581113429376 | 0.7450405303301352 | 0.4856913263624248 |
| 0.8813581113429376 | 0.7549594696698648 | 0.9856913263624179 |
| 0.1186418886570628 | 0.2549594696698650 | 0.5143086736375821 |
| 0.2126257604382872 | 0.2237083646167963 | 0.0537484439682747 |
| 0.7873742395617130 | 0.7237083646167962 | 0.4462515560317254 |
| 0.7873742395617130 | 0.7762916353832038 | 0.9462515560317254 |
| 0.2126257604382872 | 0.2762916353832037 | 0.5537484439682746 |
| 0.1811627084589228 | 0.3555949762956569 | 0.0336446153660402 |
| 0.8188372915410771 | 0.8555949762956575 | 0.4663553846339527 |
| 0.8188372915410771 | 0.6444050237043425 | 0.9663553846339600 |
| 0.1811627084589228 | 0.1444050237043427 | 0.5336446153660400 |
| 0.3919725894457043 | 0.2883779654771018 | 0.6672043658767757 |
| 0.6080274105542954 | 0.7883779654771019 | 0.8327956341232243 |
| 0.6080274105542954 | 0.7116220345228981 | 0.3327956341232245 |
| 0.3919725894457043 | 0.2116220345228981 | 0.1672043658767754 |
| 0.4661423402087929 | 0.3830359697256010 | 0.6666648077493991 |
| 0.5338576597912071 | 0.8830359697256080 | 0.8333351922506009 |
| 0.5338576597912071 | 0.6169640302743920 | 0.3333351922506009 |
| 0.4661423402087929 | 0.1169640302743989 | 0.1666648077493990 |
| 0.3321167899344731 | 0.3415797512354128 | 0.5709975946157587 |
| 0.6678832100655270 | 0.8415797512354130 | 0.9290024053842413 |
| 0.6678832100655270 | 0.6584202487645870 | 0.4290024053842413 |
| 0.3321167899344731 | 0.1584202487645870 | 0.0709975946157588 |
| 0.4025260405912334 | 0.4441691511714532 | 0.5767790607418373 |
| 0.5974739594087669 | 0.9441691511714532 | 0.9232209392581627 |
| 0.5974739594087669 | 0.5558308488285468 | 0.4232209392581628 |
| 0.4025260405912334 | 0.0558308488285468 | 0.0767790607418372 |
| 0.2909154702428229 | 0.4196770545992756 | 0.6515301926279744 |
| 0.7090845297571771 | 0.9196770545992755 | 0.8484698073720256 |
| 0.7090845297571771 | 0.5803229454007245 | 0.3484698073720327 |
| 0.2909154702428229 | 0.0803229454007245 | 0.1515301926279743 |
| 0.3591021686910896 | 0.5231664541192851 | 0.6530653310500684 |
| 0.6408978313089103 | 0.0231664541192851 | 0.8469346689499316 |
| 0.6408978313089103 | 0.4768335458807149 | 0.3469346689499320 |
| 0.3591021686910896 | 0.9768335458807149 | 0.1530653310500683 |
| 0.2204734101917461 | 0.4769189633680077 | 0.5605586441603386 |

|                    |                    |                    |
|--------------------|--------------------|--------------------|
| 0.7795265898082537 | 0.9769189633680077 | 0.9394413558396614 |
| 0.7795265898082537 | 0.5230810366319923 | 0.4394413558396619 |
| 0.2204734101917461 | 0.0230810366319923 | 0.0605586441603383 |
| 0.2897724600642422 | 0.5800031007298054 | 0.5606621563286162 |
| 0.7102275399357648 | 0.0800031007298056 | 0.9393378436713838 |
| 0.7102275399357648 | 0.4199968992701943 | 0.4393378436713838 |
| 0.2897724600642422 | 0.9199968992701946 | 0.0606621563286162 |
| 0.2273512413799438 | 0.5850137589819649 | 0.6058879982426948 |
| 0.7726487586200563 | 0.0850137589819652 | 0.8941120017573052 |
| 0.7726487586200563 | 0.4149862410180348 | 0.3941120017573049 |
| 0.2273512413799438 | 0.9149862410180351 | 0.1058879982426950 |
| 0.4885752057452215 | 0.3418829567103059 | 0.5594752040066708 |
| 0.5114247942547789 | 0.8418829567103060 | 0.9405247959933292 |
| 0.5114247942547789 | 0.6581170432896940 | 0.4405247959933292 |
| 0.4885752057452215 | 0.1581170432896941 | 0.0594752040066708 |
| 0.5604722932301263 | 0.3550156792186104 | 0.6185626924109560 |
| 0.4395277067698736 | 0.8550156792186102 | 0.8814373075890440 |
| 0.4395277067698736 | 0.6449843207813898 | 0.3814373075890443 |
| 0.5604722932301263 | 0.1449843207813896 | 0.1185626924109557 |
| 0.5420584973919028 | 0.1770866642263350 | 0.5347793719369686 |
| 0.4579415026081042 | 0.6770866642263349 | 0.9652206280630314 |
| 0.4579415026081042 | 0.8229133357736651 | 0.4652206280630314 |
| 0.5420584973919028 | 0.3229133357736649 | 0.0347793719369686 |
| 0.6012855583552762 | 0.1573249732762518 | 0.5982541931438499 |
| 0.3987144416447237 | 0.6573249732762517 | 0.9017458068561501 |
| 0.3987144416447237 | 0.8426750267237483 | 0.4017458068561431 |
| 0.6012855583552762 | 0.3426750267237482 | 0.0982541931438568 |
| 0.6803303775041785 | 0.3164529400957338 | 0.5866301038851770 |
| 0.3196696224958216 | 0.8164529400957335 | 0.9133698961148230 |
| 0.3196696224958216 | 0.6835470599042665 | 0.4133698961148232 |
| 0.6803303775041785 | 0.1835470599042662 | 0.0866301038851769 |
| 0.6206851696322692 | 0.3410700916122605 | 0.5236965933949126 |
| 0.3793148303677309 | 0.8410700916122604 | 0.9763034066050874 |
| 0.3793148303677309 | 0.6589299083877396 | 0.4763034066050877 |
| 0.6206851696322692 | 0.1589299083877394 | 0.0236965933949124 |
| 0.6557526083387346 | 0.1647683246062201 | 0.4904654697926029 |
| 0.3442473916612654 | 0.6647683246062199 | 0.0095345302073971 |
| 0.3442473916612654 | 0.8352316753937801 | 0.5095345302073969 |
| 0.6557526083387346 | 0.3352316753937798 | 0.9904654697926031 |
| 0.7111766600838695 | 0.1304119812130057 | 0.5538484007359832 |
| 0.2888233399161307 | 0.6304119812130057 | 0.9461515992640168 |
| 0.2888233399161307 | 0.8695880187869943 | 0.4461515992640242 |
| 0.7111766600838695 | 0.3695880187869944 | 0.0538484007359830 |
| 0.7421582531110881 | 0.2364862675289645 | 0.5174462989992034 |



|                    |                    |                    |
|--------------------|--------------------|--------------------|
| 0.2578417468889116 | 0.7364862675289650 | 0.9825537010007966 |
| 0.2578417468889116 | 0.7635137324710350 | 0.4825537010007969 |
| 0.7421582531110881 | 0.2635137324710355 | 0.0174462989992032 |
| 0.4768287628625571 | 0.1666893154040766 | 0.6953361320624480 |
| 0.5231712371374433 | 0.6666893154040764 | 0.8046638679375520 |
| 0.5231712371374433 | 0.8333106845959236 | 0.3046638679375520 |
| 0.4768287628625571 | 0.3333106845959234 | 0.1953361320624481 |
| 0.5364600130968977 | 0.1071346576087047 | 0.6565504356352452 |
| 0.4635399869031022 | 0.6071346576087049 | 0.8434495643647548 |
| 0.4635399869031022 | 0.8928653423912951 | 0.3434495643647546 |
| 0.5364600130968977 | 0.3928653423912954 | 0.1565504356352453 |
| 0.5729863050119985 | 0.3278613108042109 | 0.7085836255240600 |
| 0.4270136949880015 | 0.8278613108042108 | 0.7914163744759400 |
| 0.4270136949880015 | 0.6721386891957892 | 0.2914163744759400 |
| 0.5729863050119985 | 0.1721386891957891 | 0.2085836255240600 |
| 0.6355228276082381 | 0.2444952100114179 | 0.6817087608026657 |
| 0.3644771723917617 | 0.7444952100114177 | 0.8182912391973343 |
| 0.3644771723917617 | 0.7555047899885823 | 0.3182912391973339 |
| 0.6355228276082381 | 0.2555047899885821 | 0.1817087608026659 |
| 0.5675802411735648 | 0.1944967769130149 | 0.7783196940935280 |
| 0.4324197588264354 | 0.6944967769130148 | 0.7216803059064720 |
| 0.4324197588264354 | 0.8055032230869852 | 0.2216803059064719 |
| 0.5675802411735648 | 0.3055032230869851 | 0.2783196940935281 |
| 0.6280977409300919 | 0.1064460973464003 | 0.7523161836012729 |
| 0.3719022590699081 | 0.6064460973464006 | 0.7476838163987271 |
| 0.3719022590699081 | 0.8935539026535994 | 0.2476838163987267 |
| 0.6280977409300919 | 0.3935539026536068 | 0.2523161836012733 |
| 0.7348261433972881 | 0.2443620349331619 | 0.7693880196820149 |
| 0.2651738566027124 | 0.7443620349331620 | 0.7306119803179851 |
| 0.2651738566027124 | 0.7556379650668380 | 0.2306119803179851 |
| 0.7348261433972881 | 0.2556379650668381 | 0.2693880196820149 |
| 0.7045136811827761 | 0.2152154497524949 | 0.8287788523941517 |
| 0.2954863188172238 | 0.7152154497524948 | 0.6712211476058483 |
| 0.2954863188172238 | 0.7847845502475052 | 0.1712211476058480 |
| 0.7045136811827761 | 0.2847845502475053 | 0.3287788523941521 |
| 0.6728592409787798 | 0.3348415537772348 | 0.7935940996026968 |
| 0.3271407590212203 | 0.8348415537772353 | 0.7064059003973032 |
| 0.3271407590212203 | 0.6651584462227647 | 0.2064059003973033 |
| 0.6728592409787798 | 0.1651584462227650 | 0.2935940996026968 |
| 0.4612330301364426 | 0.1010175777716034 | 0.5782213770749671 |
| 0.5387669698635643 | 0.6010175777716034 | 0.9217786229250329 |
| 0.5387669698635643 | 0.8989824222283966 | 0.4217786229250333 |
| 0.4612330301364426 | 0.3989824222283967 | 0.0782213770749668 |
| 0.3959957133761146 | 0.2034746755715846 | 0.5497148021924829 |

|                    |                    |                    |
|--------------------|--------------------|--------------------|
| 0.6040042866238853 | 0.7034746755715848 | 0.9502851978075171 |
| 0.6040042866238853 | 0.7965253244284152 | 0.4502851978075171 |
| 0.3959957133761146 | 0.2965253244284153 | 0.0497148021924829 |
| 0.3818573395417587 | 0.0855546297959380 | 0.6517732339103387 |
| 0.6181426604582412 | 0.5855546297959378 | 0.8482267660896613 |
| 0.6181426604582412 | 0.9144453702040622 | 0.3482267660896616 |
| 0.3818573395417587 | 0.4144453702040621 | 0.1517732339103456 |
| 0.3112085094438075 | 0.1661815347208718 | 0.6108281121447369 |
| 0.6887914905561858 | 0.6661815347208717 | 0.8891718878552631 |
| 0.6887914905561858 | 0.8338184652791283 | 0.3891718878552631 |
| 0.3112085094438075 | 0.3338184652791283 | 0.1108281121447370 |
| 0.3089426470472594 | 0.0308057905749823 | 0.5362894963705983 |
| 0.6910573529527403 | 0.5308057905749822 | 0.9637105036294017 |
| 0.6910573529527403 | 0.9691942094250178 | 0.4637105036294016 |
| 0.3089426470472594 | 0.4691942094250177 | 0.0362894963705984 |
| 0.3764058796049593 | 0.9525852254120162 | 0.5807960816304568 |
| 0.6235941203950406 | 0.4525852254120166 | 0.9192039183695432 |
| 0.6235941203950406 | 0.0474147745879835 | 0.4192039183695431 |
| 0.3764058796049593 | 0.5474147745879838 | 0.0807960816304570 |
| 0.2439436879755853 | 0.8809741103640819 | 0.5759677872423811 |
| 0.7560563120244148 | 0.3809741103640819 | 0.9240322127576189 |
| 0.7560563120244148 | 0.1190258896359180 | 0.4240322127576190 |
| 0.2439436879755853 | 0.6190258896359181 | 0.0759677872423810 |
| 0.2112071331907248 | 0.0077234640699775 | 0.5935198723185812 |
| 0.7887928668092751 | 0.5077234640699777 | 0.9064801276814188 |
| 0.7887928668092751 | 0.9922765359300223 | 0.4064801276814185 |
| 0.2112071331907248 | 0.4922765359300225 | 0.0935198723185813 |
| 0.2804998540706468 | 0.9341996799181020 | 0.6400218770569790 |
| 0.7195001459293461 | 0.4341996799181018 | 0.8599781229430210 |
| 0.7195001459293461 | 0.0658003200818981 | 0.3599781229430139 |
| 0.2804998540706468 | 0.5658003200818980 | 0.1400218770569859 |

# FREE ENERGIE OF THE ION-ELECTRON SYSTEM (eV)

Free energy TOTEN = -3179.98454709 eV

Energy without entropy = -3179.98454709 energy (sigma->0) = -3179.98454709

Optimized cell vectors and atomic coordinates of (n-Bu<sub>4</sub>N)[2-B<sub>10</sub>Br<sub>9</sub>S(n-C<sub>18</sub>H<sub>37</sub>)<sub>2</sub>]

|                     |                     |                     |
|---------------------|---------------------|---------------------|
| 10.3770106324109097 | 4.9800378019345013  | 2.1484104603020460  |
| -0.1401438288757366 | 11.7331691146867580 | 1.8794548923164045  |
| 0.3765801753295561  | -0.0926627370554378 | 27.5622094444218178 |

|    |   |   |     |    |     |
|----|---|---|-----|----|-----|
| Br | S | N | C   | B  | H   |
| 18 | 2 | 2 | 104 | 20 | 220 |

Direct

|                    |                    |                    |
|--------------------|--------------------|--------------------|
| 0.0808774558166847 | 0.0499398385747906 | 0.8100733562753831 |
| 0.9191143496102260 | 0.9500719144321594 | 0.1899279631316569 |
| 0.9144518229624883 | 0.4009245717348350 | 0.8486512014968524 |
| 0.0855469196693560 | 0.5990750303922924 | 0.1513566055654873 |
| 0.0906541693648453 | 0.0680737733841386 | 0.9502708589060870 |
| 0.9093341731495985 | 0.9319340918736759 | 0.0497248921406679 |
| 0.4290121041494310 | 0.9105575228191042 | 0.8346102760613934 |
| 0.5709871594578242 | 0.0894417023202884 | 0.1653891472078650 |
| 0.1840234719244972 | 0.5102400020278666 | 0.8006773833155875 |
| 0.8159812890215524 | 0.4897660211198312 | 0.1993297342697562 |
| 0.0568363164369554 | 0.3952988997763462 | 0.9586237969653468 |
| 0.9431628459683596 | 0.6046934349952164 | 0.0413776100401890 |
| 0.4126040904704328 | 0.0509585701977210 | 0.9537907215958599 |
| 0.5874031291322627 | 0.9490417220942033 | 0.0462072709737517 |
| 0.5325310604323892 | 0.1762553167433528 | 0.7957331902951230 |
| 0.4674691699358698 | 0.8237373736861714 | 0.2042690810023204 |
| 0.3996753590034181 | 0.3864304309699317 | 0.9052407383086702 |
| 0.6003229155737319 | 0.6135674134302379 | 0.0947620581146446 |
| 0.2586845514508769 | 0.2526312894507925 | 0.7372946478616992 |
| 0.7413117010757461 | 0.7473800364457408 | 0.2627065078757900 |
| 0.8434281399367426 | 0.8280468403440774 | 0.8833479884580747 |
| 0.1565729645911330 | 0.1719522513485235 | 0.1166520660883106 |
| 0.0901929136855196 | 0.3303387893147617 | 0.7283600964433534 |
| 0.9097997434138507 | 0.6696726378365442 | 0.2716427537328211 |
| 0.0699309229272669 | 0.3874823418749926 | 0.6758302002407072 |
| 0.9300637265092666 | 0.6125256670590395 | 0.3241715569076165 |
| 0.9285302805596082 | 0.4333198369939912 | 0.6702109991882188 |
| 0.0714672783984830 | 0.5666824251726548 | 0.3297890216619707 |
| 0.8916699242877444 | 0.5180708504682767 | 0.6230089301454863 |

|                    |                    |                    |
|--------------------|--------------------|--------------------|
| 0.1083289626223575 | 0.4819288759609728 | 0.3769901085608454 |
| 0.7552299760834146 | 0.5506395655274862 | 0.6145549377312609 |
| 0.2447694192170013 | 0.4493589983503931 | 0.3854443010520103 |
| 0.7116342257906949 | 0.6495536075101301 | 0.5715260059378183 |
| 0.2883640640621211 | 0.3504465212021962 | 0.4284731297944474 |
| 0.5337876130609810 | 0.7799672162687227 | 0.5190612892158527 |
| 0.4662117845276399 | 0.2200321843886602 | 0.4809384394165945 |
| 0.4037879036860347 | 0.8047753650750251 | 0.5058402760546212 |
| 0.5962121574138549 | 0.1952228475530572 | 0.4941598008978055 |
| 0.3520699729569278 | 0.9185974214465235 | 0.4688808019305883 |
| 0.6479311910912050 | 0.0813996225364580 | 0.5311195171401522 |
| 0.2203060195281971 | 0.9449111799352027 | 0.4570351104552858 |
| 0.7796956000588376 | 0.0550864648549443 | 0.5429647799645255 |
| 0.1655715320231118 | 0.0602597008426365 | 0.4211013432543340 |
| 0.8344314328405295 | 0.9397374488320276 | 0.5788975164738186 |
| 0.0341715041184460 | 0.0840906888714796 | 0.4095441441995940 |
| 0.9658300747585012 | 0.9159071592850340 | 0.5904547202567216 |
| 0.9804160968048407 | 0.1952106772675457 | 0.3716937997726344 |
| 0.0195850643362457 | 0.8047868572150025 | 0.6283055779726786 |
| 0.8554551564461181 | 0.2102501785473750 | 0.3565938886520030 |
| 0.1445455103439665 | 0.7897478937380159 | 0.6434061927500793 |
| 0.7985204552460921 | 0.3244632353788962 | 0.3203193401352884 |
| 0.2014806154900682 | 0.6755344399597867 | 0.6796809249294460 |
| 0.6804300545118981 | 0.3343474993311122 | 0.3005689485125663 |
| 0.3195706644652337 | 0.6656506173134689 | 0.6994315847837441 |
| 0.7129548963177287 | 0.2421102551752504 | 0.2617013855889798 |
| 0.2870458426863684 | 0.7578884096669425 | 0.7382985899360195 |
| 0.3080949930383609 | 0.0987617763143525 | 0.7145620771248322 |
| 0.6918986403868399 | 0.9012495184920895 | 0.2854364245092628 |
| 0.4383201353662216 | 0.0560548761866022 | 0.6823521359169488 |
| 0.5616767549807703 | 0.9439562866776443 | 0.3176483890559776 |
| 0.4678541063719598 | 0.9398565288399893 | 0.6558685566621071 |
| 0.5321404966634624 | 0.0601515353552304 | 0.3441341131274871 |
| 0.3585136299225571 | 0.9539779947633523 | 0.6293394312005911 |
| 0.6414829394347875 | 0.0460281851900287 | 0.3706625522148728 |
| 0.3110606465901719 | 0.0699531342631532 | 0.5929322642278869 |
| 0.6889377257644707 | 0.9300502283361102 | 0.4070674723065381 |
| 0.1791010746686603 | 0.0993336273877405 | 0.5805271239308190 |
| 0.8208995791551716 | 0.9006665912555667 | 0.4194721541513836 |
| 0.1280278948055314 | 0.2136509140163209 | 0.5439843749028094 |
| 0.8719736677158959 | 0.7863487642632849 | 0.4560140164130795 |
| 0.9938345911692248 | 0.2434764131399373 | 0.5339735928307920 |
| 0.0061688209573972 | 0.7565212702444063 | 0.4660248830172433 |
| 0.9427648375513019 | 0.3541568597143311 | 0.4958513285693418 |

|                    |                    |                    |
|--------------------|--------------------|--------------------|
| 0.0572375608557230 | 0.6458405885199812 | 0.5041468442449851 |
| 0.8117409969593834 | 0.3780086738409891 | 0.4841932302510164 |
| 0.1882600162123603 | 0.6219894872388591 | 0.5158054990028125 |
| 0.7597012783383751 | 0.4882628957229188 | 0.4459800552337557 |
| 0.2402992494952019 | 0.5117352749346015 | 0.5540189133851653 |
| 0.6322695250860092 | 0.5066329222601680 | 0.4323932926093550 |
| 0.3677310572208830 | 0.4933651727840104 | 0.5676059860081694 |
| 0.5780990525983962 | 0.6180633721436694 | 0.3948741333946880 |
| 0.4219019095030445 | 0.3819355699874170 | 0.6051256988056883 |
| 0.4522936375893433 | 0.6340185319525994 | 0.3803642125594101 |
| 0.5477080101041386 | 0.3659804583194558 | 0.6196350550470228 |
| 0.3929187329889304 | 0.7523999962383837 | 0.3466021156320178 |
| 0.6070822404383892 | 0.2475994407264741 | 0.6533973816121793 |
| 0.2671697987400333 | 0.7719422518688021 | 0.3310432698710539 |
| 0.7328309078139692 | 0.2280569497934564 | 0.6689556486912333 |
| 0.2019883228358550 | 0.9005156666310871 | 0.3037793071287098 |
| 0.7980111075504112 | 0.0994837715401248 | 0.6962198770335378 |
| 0.0805674957982817 | 0.9190417751271166 | 0.2851225220641070 |
| 0.9194326787310837 | 0.0809566900299955 | 0.7148769129986727 |
| 0.8866470013994511 | 0.7637863163263097 | 0.8356751435075169 |
| 0.1133512666154270 | 0.2362124942912546 | 0.1643248931969220 |
| 0.7900876961792155 | 0.8144040914490728 | 0.7992876644781918 |
| 0.2099101219480343 | 0.1855952473706284 | 0.2007123947063534 |
| 0.8323190440693810 | 0.7268541250637003 | 0.7576809059807534 |
| 0.1676817069071723 | 0.2731468388491153 | 0.2423184496521071 |
| 0.7346049242175843 | 0.7737244105999068 | 0.7215533484914767 |
| 0.2653952884478148 | 0.2262747508113484 | 0.2784461499631531 |
| 0.8166571280268394 | 0.9653740956750008 | 0.8720110829521434 |
| 0.1833402394488759 | 0.0346252162598846 | 0.1279892907231632 |
| 0.7847769629956766 | 0.0371284020972840 | 0.9172551134042346 |
| 0.2152248271483096 | 0.9628690146282365 | 0.0827451357540557 |
| 0.7563098611103048 | 0.1746607046490196 | 0.9020306479211087 |
| 0.2436903405590709 | 0.8253378570667371 | 0.0979697108773313 |
| 0.7218673193621844 | 0.2466814470093290 | 0.9476102485223722 |
| 0.2781344817904861 | 0.7533155374113365 | 0.0523901933580580 |
| 0.9475359381695125 | 0.7614228251866845 | 0.9165784681847560 |
| 0.0524669424253373 | 0.2385743316116715 | 0.0834206726619863 |
| 0.0729597666651405 | 0.7731123026734684 | 0.8988952163009021 |
| 0.9270415862454024 | 0.2268876583407169 | 0.1011041576768230 |
| 0.1635639244612191 | 0.7049668830266780 | 0.9376226209962382 |
| 0.8364377823977512 | 0.2950309527952517 | 0.0623766663833793 |
| 0.2921941542057060 | 0.7123310613299749 | 0.9221932819180898 |
| 0.7078077664362259 | 0.2876655067171675 | 0.0778061099781531 |
| 0.7210105481106778 | 0.8212938197320916 | 0.9107997482350794 |

|                    |                    |                    |
|--------------------|--------------------|--------------------|
| 0.2789904909452856 | 0.1787035563544699 | 0.0891999553357172 |
| 0.7207335936162228 | 0.6927933895894638 | 0.9183502471286813 |
| 0.2792711543555476 | 0.3072023907610169 | 0.0816515842587608 |
| 0.6052797231311676 | 0.6975053114594822 | 0.9563022815319866 |
| 0.3947232004763278 | 0.3024908772971505 | 0.0436983221349581 |
| 0.6040193139483685 | 0.5692810228112254 | 0.9679460559863833 |
| 0.3959841619688731 | 0.4307150826819859 | 0.0320546617735232 |
| 0.5828514257511637 | 0.6708394886660266 | 0.5581356737084178 |
| 0.4171472465472862 | 0.3291602882859852 | 0.4418637704699609 |
| 0.3177709781424039 | 0.1561905023962524 | 0.9006294010322998 |
| 0.6822288291375650 | 0.8438067601118054 | 0.0993702607338041 |
| 0.3095577427372355 | 0.0838769451052868 | 0.8485917806935734 |
| 0.6904421297608496 | 0.9161239119493523 | 0.1514064104370814 |
| 0.0952588681640328 | 0.2875390564280293 | 0.8531011598569997 |
| 0.9047424259575341 | 0.7124628109032578 | 0.1469022481956132 |
| 0.1681761930697322 | 0.1495703861030292 | 0.8957108331977396 |
| 0.8318252753361871 | 0.8504287958562434 | 0.1042887884242068 |
| 0.3670375956500308 | 0.2056622477365107 | 0.8370570092105781 |
| 0.6329590798236175 | 0.7943406001671953 | 0.1629445558998770 |
| 0.1568308797862006 | 0.1383246454699174 | 0.8366518734028414 |
| 0.8431697619926957 | 0.8616776397026730 | 0.1633485016747857 |
| 0.1681718561438825 | 0.2998843102166037 | 0.9030993594185588 |
| 0.8318295973542350 | 0.7001127475056703 | 0.0969023474324344 |
| 0.2174239923821829 | 0.3489591256219287 | 0.8395519427336410 |
| 0.7825765184874618 | 0.6510448320350251 | 0.1604510009482695 |
| 0.3143443194394278 | 0.3006953739265046 | 0.8836690965440775 |
| 0.6856528452305162 | 0.6993048853045947 | 0.1163339277197265 |
| 0.2371955955125563 | 0.2217604392631233 | 0.8068561810609449 |
| 0.7628019588044618 | 0.7782450269038906 | 0.1931452177155822 |
| 0.0503036770051000 | 0.2607760584554683 | 0.7406778039817757 |
| 0.0464813013771223 | 0.4032706018171908 | 0.7547724442518530 |
| 0.9496812678186614 | 0.7392408502823179 | 0.2593240009545101 |
| 0.9534989134278971 | 0.5967498281594844 | 0.2452266788305164 |
| 0.1307452348854286 | 0.3193105088651577 | 0.6482767004748721 |
| 0.0981155997013100 | 0.4662273746485031 | 0.6681444101356324 |
| 0.8692511832470540 | 0.6806992257971480 | 0.3517254436674839 |
| 0.9018756772121057 | 0.5337834742096478 | 0.3318550393682194 |
| 0.9072820635668912 | 0.3513696972984422 | 0.6711660363206775 |
| 0.8676137965279432 | 0.4843584836530054 | 0.7026415797868526 |
| 0.0927185003251017 | 0.6486309438876703 | 0.3288337191512029 |
| 0.1323807563688109 | 0.5156446619002516 | 0.2973574496629298 |
| 0.9596319617360195 | 0.4726505426405422 | 0.5906820815785355 |
| 0.9023345944513377 | 0.6051002489737104 | 0.6247072426444519 |
| 0.0403690908790585 | 0.5273476307225842 | 0.4093174726190265 |

|                    |                    |                    |
|--------------------|--------------------|--------------------|
| 0.0976627259070542 | 0.3949006081872183 | 0.3752918394108186 |
| 0.6878349860939339 | 0.5839760690174415 | 0.6487146371433266 |
| 0.7493374107112103 | 0.4645106494439609 | 0.6077703557704038 |
| 0.3121636342942237 | 0.4160216046192913 | 0.3512846811769298 |
| 0.2506641011192646 | 0.5354871242131637 | 0.3922281516433507 |
| 0.7060648081079250 | 0.7391002337747448 | 0.5807976372485262 |
| 0.7852181325673270 | 0.6222911737182467 | 0.5385705822428792 |
| 0.2939359575265776 | 0.2608984493723402 | 0.4192020203547739 |
| 0.2147815408495841 | 0.3777077100471115 | 0.4614290947069399 |
| 0.6049565841928560 | 0.7619679460625883 | 0.4852110495339457 |
| 0.5276714022682596 | 0.8657479161911052 | 0.5322935270950001 |
| 0.3950436142089051 | 0.2380305201793653 | 0.5147891317995649 |
| 0.4723294817251179 | 0.1342499018094281 | 0.4677066014790009 |
| 0.4106298642513003 | 0.7208999915029263 | 0.4908686092171884 |
| 0.3335833078911657 | 0.8183402067366111 | 0.5399890506788924 |
| 0.5893708044230715 | 0.2790982134533699 | 0.5091313156766202 |
| 0.6664168867691649 | 0.1816579174583510 | 0.4600109700980742 |
| 0.4205864508869153 | 0.9045838871482306 | 0.4342499886978935 |
| 0.3471485001061766 | 0.0020507971066410 | 0.4836037883354675 |
| 0.5794139970600963 | 0.0954133427075722 | 0.5657499582542418 |
| 0.6528519604023914 | 0.9979477534662832 | 0.5163956898480776 |
| 0.2258946341662212 | 0.8620050854925518 | 0.4416717378364097 |
| 0.1526458850494405 | 0.9566248846330138 | 0.4918600450892340 |
| 0.7741063911857846 | 0.1379924140910463 | 0.5583282267113063 |
| 0.8473536421166921 | 0.0433740706024013 | 0.5081394425571091 |
| 0.2331336069556414 | 0.0489357831455418 | 0.3862439945025741 |
| 0.1590754504050588 | 0.1436204631032252 | 0.4363958047527719 |
| 0.7668698925359743 | 0.9510580810697234 | 0.6137546296567935 |
| 0.8409275170693350 | 0.8563770546471884 | 0.5636025544895059 |
| 0.0406503060590422 | 0.9986865555843739 | 0.3959445281818444 |
| 0.9593511649747107 | 0.0013105747033515 | 0.6040550196952005 |
| 0.9656123137801267 | 0.2822179357958891 | 0.3866484542895562 |
| 0.0343904769158277 | 0.7177789217461529 | 0.6133510651894694 |
| 0.7841601321884849 | 0.2169580264489600 | 0.3900289957094848 |
| 0.8732858884153376 | 0.1241387289579558 | 0.3402828613420112 |
| 0.2158420584715442 | 0.7830399614904358 | 0.6099713340823273 |
| 0.1267144240751225 | 0.8758592724980786 | 0.6597172323052747 |
| 0.7737375432639104 | 0.4101375463618556 | 0.3384812372636604 |
| 0.8728018645223753 | 0.3228209213442583 | 0.2886002663941040 |
| 0.2262634866831962 | 0.5898604532520715 | 0.6615185121095558 |
| 0.1271986541730065 | 0.6771762518933675 | 0.7113998262496147 |
| 0.6124501823258877 | 0.3199196796771665 | 0.3319631679036459 |
| 0.6300905888455652 | 0.4305155434285450 | 0.2841286193757159 |
| 0.3875513591700862 | 0.6800764222309008 | 0.6680372743728366 |

|                    |                     |                    |
|--------------------|---------------------|--------------------|
| 0.3699087510352649 | 0.5694823164875221  | 0.7158717771739241 |
| 0.7720991909337703 | 0.2620047900858226  | 0.2283716465606899 |
| 0.6265397673410324 | 0.2477861974292064  | 0.2494878587889118 |
| 0.7668794034607003 | 0.14425711111448971 | 0.2754194563696991 |
| 0.2279005521159402 | 0.7379949176587081  | 0.7716280504963080 |
| 0.3734604841121484 | 0.7522115239383930  | 0.7505124226630843 |
| 0.2331223506809677 | 0.8557407446884098  | 0.7245803555727762 |
| 0.3061575513213218 | 0.0325738247921719  | 0.7468134788497124 |
| 0.2315093828774101 | 0.1125767298355249  | 0.6937454180903911 |
| 0.6938336643830010 | 0.9674443374331513  | 0.2531884534048054 |
| 0.7684809713205553 | 0.8874449545685830  | 0.3062519191080734 |
| 0.4399482544859592 | 0.1329138582450545  | 0.6548256360975662 |
| 0.5130428944806523 | 0.0362252908716117  | 0.7052510652322811 |
| 0.5600557316939078 | 0.8670929673999516  | 0.3451742735829659 |
| 0.4869513733552240 | 0.9637866598747222  | 0.2947506644785094 |
| 0.4885571553923097 | 0.8573351412506575  | 0.6828737993517094 |
| 0.5564989824876889 | 0.9207930109247320  | 0.6293600178606438 |
| 0.5114354528398050 | 0.1426758682236984  | 0.3171303160191609 |
| 0.4434967754668535 | 0.0792125922440868  | 0.3706440747331848 |
| 0.2769634426894138 | 0.9552606182404326  | 0.6572989615567281 |
| 0.3879575151483265 | 0.8694850361824118  | 0.6099022335905768 |
| 0.7230315440900149 | 0.0447462961320806  | 0.3427025813766562 |
| 0.6120418489164171 | 0.1305184637516514  | 0.3901012774137776 |
| 0.3057223364642399 | 0.1528716833773018  | 0.6082100691256573 |
| 0.3807590355141247 | 0.0568507191026774  | 0.5587786855241832 |
| 0.6942771604539307 | 0.8471325575959134  | 0.3917886950235643 |
| 0.6192412142677673 | 0.9431478463444545  | 0.4412212684932003 |
| 0.1817655258764649 | 0.0169549782112452  | 0.5658548700892218 |
| 0.1105327091235604 | 0.1139491922416990  | 0.6152134698742950 |
| 0.8182351397441451 | 0.9830454489788869  | 0.4341446389265323 |
| 0.8894664536603255 | 0.8860529655757637  | 0.3847852017040502 |
| 0.1942042489553560 | 0.1979269797965392  | 0.5087908314892390 |
| 0.1277092628392399 | 0.2959028691083683  | 0.5580504350312143 |
| 0.8057984078314355 | 0.8020707687937884  | 0.4912080519944998 |
| 0.8722912166355988 | 0.7040979141381046  | 0.4419476153788878 |
| 0.9269645818987691 | 0.2619919902408420  | 0.5690788909642830 |
| 0.9944134866993726 | 0.1596682174169402  | 0.5212666207376210 |
| 0.0730373336959729 | 0.7380053792023640  | 0.4309195831094839 |
| 0.0055897825029399 | 0.8403294040057796  | 0.4787316383641741 |
| 0.9375763941251216 | 0.4394722391811391  | 0.5090934338684623 |
| 0.0624254755841167 | 0.5605253512417104  | 0.4909049739631476 |
| 0.7426685122759767 | 0.3940846509193011  | 0.5187041908567886 |
| 0.8178732455355069 | 0.2925572616370551  | 0.4707675217563986 |
| 0.2573340191242742 | 0.6059122534247482  | 0.4812947863852098 |



|                    |                    |                    |
|--------------------|--------------------|--------------------|
| 0.1821280845144890 | 0.7074408559875767 | 0.5292311865837143 |
| 0.8309556074966629 | 0.4739227850241693 | 0.4121874997606372 |
| 0.7488407678632469 | 0.5749583393056750 | 0.4600140223163238 |
| 0.1690442270413622 | 0.5260759576047238 | 0.5878114812256052 |
| 0.2511606712794545 | 0.4250392833106770 | 0.5399851701236713 |
| 0.6441633933588520 | 0.4203184493497012 | 0.4177773175780791 |
| 0.5615305819650043 | 0.5188443219862786 | 0.4663355651719531 |
| 0.3558370324033950 | 0.5796804166273704 | 0.5822216684874205 |
| 0.4384700811683696 | 0.4811539169335725 | 0.5336637598223088 |
| 0.6492434132264211 | 0.6080560914659137 | 0.3611786727261602 |
| 0.5634691043543754 | 0.7044742098567833 | 0.4103343336326145 |
| 0.3507573263809952 | 0.3919445265797478 | 0.6388212241869227 |
| 0.4365310116982459 | 0.2955245463058526 | 0.5896656015055473 |
| 0.4688033512782942 | 0.5507707407361584 | 0.3621862676385245 |
| 0.3835205085557886 | 0.6365695470441908 | 0.4143027645785034 |
| 0.5311975363461889 | 0.4492285116632727 | 0.6378128267686760 |
| 0.6164795317068181 | 0.3634306467406083 | 0.5856963589146885 |
| 0.3761952005102489 | 0.8344854426700828 | 0.3656326477745379 |
| 0.4620151681009224 | 0.7510603313549319 | 0.3130484611454701 |
| 0.6238041584861302 | 0.1655146409595515 | 0.6343670155232695 |
| 0.5379854235085620 | 0.2489403653560149 | 0.6869507008302610 |
| 0.2850205884780999 | 0.6975974624191018 | 0.3072818435573681 |
| 0.2009522995726390 | 0.7616706856862695 | 0.3641107304542934 |
| 0.7149813251223806 | 0.3024015391374291 | 0.6927168949942538 |
| 0.7990489652372491 | 0.2383271314744645 | 0.6358881378520401 |
| 0.1805578799822196 | 0.9738093408783260 | 0.3284422157903499 |
| 0.2701395560458634 | 0.9133340403666793 | 0.2722927509090616 |
| 0.8194417830618906 | 0.0261895970520140 | 0.6715574113644905 |
| 0.7298597614840099 | 0.0866660253185228 | 0.7277063910606479 |
| 0.0343833716763029 | 0.0129848107547867 | 0.2663080705055327 |
| 0.0093753643587765 | 0.9080275173354074 | 0.3157558482822074 |
| 0.1016544328068512 | 0.8501280962859591 | 0.2585595232151242 |
| 0.9656166175018792 | 0.9870129237594388 | 0.7336916571815493 |
| 0.9906252955288162 | 0.0919698098511854 | 0.6842436408553263 |
| 0.8983458719583944 | 0.1498703437538212 | 0.7414397079307241 |
| 0.9759447942144649 | 0.7717795637161828 | 0.8189231557199987 |
| 0.9112423118043650 | 0.6639829620618253 | 0.8465097240920483 |
| 0.0240543417855415 | 0.2282222124257678 | 0.1810759946053320 |
| 0.0887587691511551 | 0.3360181319990235 | 0.1534894197194435 |
| 0.6948229707885428 | 0.8241241982561545 | 0.8180670932970344 |
| 0.7778593539325407 | 0.9088835633751611 | 0.7831305065757731 |
| 0.3051758316503627 | 0.1758693307643567 | 0.1819334566841749 |
| 0.2221334878894316 | 0.0911167134409575 | 0.2168709389307680 |
| 0.8462641401472778 | 0.6318907347236074 | 0.7740731170774043 |

|                    |                    |                    |
|--------------------|--------------------|--------------------|
| 0.9268224543288921 | 0.7176775618637924 | 0.7377890612654694 |
| 0.1537407708330245 | 0.3681090111560337 | 0.2259254174553549 |
| 0.0731773164930257 | 0.2823276959355632 | 0.2622101373310164 |
| 0.7650042185804433 | 0.7117852838813971 | 0.6913779004868905 |
| 0.7201592613198975 | 0.8682149144791297 | 0.7046537004188369 |
| 0.6408091219400894 | 0.7797944869606082 | 0.7407672722607079 |
| 0.2349980172001780 | 0.2882147058504831 | 0.3086213153690890 |
| 0.2798367187448815 | 0.1317857313330853 | 0.2953465398799709 |
| 0.3591924676175047 | 0.2201997001910127 | 0.2592324150554281 |
| 0.9018581205451321 | 0.9685391704573343 | 0.8481111452272817 |
| 0.0981426474790645 | 0.0314592767933623 | 0.1518887745381748 |
| 0.7005040327294679 | 0.0327073171723418 | 0.9417356153979692 |
| 0.2994946070934149 | 0.9672918875394758 | 0.0582642474510317 |
| 0.8403714268042664 | 0.1817405462050119 | 0.8782956859263800 |
| 0.6766936529019490 | 0.2163465778879856 | 0.8797955283429020 |
| 0.1596296099686945 | 0.8182576933336840 | 0.1217043253036409 |
| 0.3233068435061773 | 0.7836518246883624 | 0.1202052958872338 |
| 0.7024377628107102 | 0.3452990955918527 | 0.9372258734335176 |
| 0.8009582052854469 | 0.2069288424083766 | 0.9698808595413062 |
| 0.6365472020552838 | 0.2423909743157042 | 0.9712463918390987 |
| 0.2975648812788215 | 0.6546978267670648 | 0.0627749918961190 |
| 0.1990435847849643 | 0.7930672654726496 | 0.0301198761148179 |
| 0.3634539233482555 | 0.7576065879833200 | 0.0287539904426261 |
| 0.9052192957929843 | 0.7989374999756305 | 0.9529595695699971 |
| 0.9642349149453583 | 0.6623731095875833 | 0.9207389791215890 |
| 0.0947839375222336 | 0.2010608040096898 | 0.0470400822574866 |
| 0.0357671031835994 | 0.3376259742931818 | 0.0792604848818149 |
| 0.0579953317332499 | 0.8719191923095359 | 0.8933942443204262 |
| 0.1194645420642325 | 0.7311745699968478 | 0.8633368012935630 |
| 0.9420066947803399 | 0.1280795214938016 | 0.1066054170902596 |
| 0.8805369026475084 | 0.2688256750194066 | 0.1366620366296362 |
| 0.1173913737421178 | 0.7461531703112277 | 0.9733510694368335 |
| 0.1781249343513910 | 0.6061212175920629 | 0.9436315587909969 |
| 0.8826105197033953 | 0.2538458850885209 | 0.0266480969900424 |
| 0.8218749131172426 | 0.3938777817473543 | 0.0563678484102841 |
| 0.3388315802369554 | 0.6734005853371137 | 0.8861475473981877 |
| 0.3573161950268169 | 0.6591126963116974 | 0.9494868238976910 |
| 0.2805006119130790 | 0.8098888618151949 | 0.9189197891720533 |
| 0.6611706750755545 | 0.3265966753189308 | 0.1138516114288231 |
| 0.6426860919928357 | 0.3408834283906020 | 0.0505121911226013 |
| 0.7195020931595917 | 0.1901072875580351 | 0.0810797677512738 |
| 0.7062042536684493 | 0.8569857717162356 | 0.9469042153916932 |
| 0.6425935972204858 | 0.8881505919428068 | 0.8907458609092078 |
| 0.2937968178197585 | 0.1430135809790578 | 0.0530962680892729 |

|                    |                    |                    |
|--------------------|--------------------|--------------------|
| 0.3574084530217336 | 0.1118436171598503 | 0.1092544854557362 |
| 0.7161825628954003 | 0.6622692872691993 | 0.8833202535931166 |
| 0.8084757330229742 | 0.6211905307450526 | 0.9321572937805147 |
| 0.2838236704148731 | 0.3377258080146684 | 0.1166809464896948 |
| 0.1915276277117444 | 0.3788071185624761 | 0.0678444623675696 |
| 0.6089754788141846 | 0.7320713531313094 | 0.9905178859667697 |
| 0.5159257987419675 | 0.7658336946091974 | 0.9425448154533550 |
| 0.3910260392943202 | 0.2679257688594245 | 0.0094828780583336 |
| 0.4840779612270100 | 0.2341616542828714 | 0.0574552950877192 |
| 0.5903893420307403 | 0.5366341000716877 | 0.9352177676053718 |
| 0.5261001686261482 | 0.5718665439636355 | 0.9976385987049500 |
| 0.6946309074755722 | 0.4995441857095766 | 0.9801770042998733 |
| 0.4096154883007749 | 0.4633614110397251 | 0.0647826761782523 |
| 0.4739022578529934 | 0.4281299309546915 | 0.0023615668742137 |
| 0.3053716135850101 | 0.5004522295927333 | 0.0198241777212959 |
| 0.5112348391265834 | 0.6876117803978575 | 0.5919099600441131 |
| 0.5912008854776175 | 0.5843542665725260 | 0.5448890758206054 |
| 0.4887658645808313 | 0.3123870880391925 | 0.4080901923597239 |
| 0.4087989775766089 | 0.4156442674304278 | 0.4551109436853005 |
| 0.7362057606365644 | 0.0068163913189387 | 0.8504541088984999 |
| 0.2637941767951401 | 0.9931820022835107 | 0.1495465000062065 |
| 0.0116262356861111 | 0.3371972319519527 | 0.4613385032639223 |
| 0.9883753365339989 | 0.6628009111997266 | 0.5386597028290102 |
| 0.8646938548693320 | 0.9969218051259233 | 0.9391962900722874 |
| 0.1353054401719161 | 0.0030752261754783 | 0.0608042682677046 |
| 0.0525611543162071 | 0.1839135093581736 | 0.3383250964272912 |
| 0.9474401343928408 | 0.8160840378616645 | 0.6616740486626337 |
| 0.9658322839605181 | 0.0989385830964376 | 0.4442355645728516 |
| 0.0341703876099421 | 0.9010585781955586 | 0.5557636908905236 |

#### FREE ENERGIE OF THE ION-ELECTRON SYSTEM (eV)

Free energy TOTEN = -1989.89603557 eV

Energy without entropy = -1989.89603557 energy (sigma->0) = -1989.89603557
